# Supplementary material for: Analysis of the genetic structure and selection signature of Xiangyang Black pigs using whole-genome resequencing data
Source: Research Square preprint supplement (doi:10.21203/rs.3.rs-7454947/v1), 2025-09-17
Supplement: Supplementary file 1 [file 4c9e54a224c9c0b9fcfcfb81.xlsx]

## Sheet: Table S1
Table S1. Potential candidate regions detected by Fst (Xiangyang Black VS Western pig breeds)
Chr	Start	End	WEIGHTED_Fst
1	14250001	14350000	0.484557
1	14300001	14400000	0.517385
1	14350001	14450000	0.52001
1	14400001	14500000	0.45567
1	17100001	17200000	0.457557
1	17150001	17250000	0.454498
1	17200001	17300000	0.456396
1	18250001	18350000	0.452557
1	32400001	32500000	0.542531
1	33900001	34000000	0.455252
1	36600001	36700000	0.556545
1	36650001	36750000	0.475174
1	46400001	46500000	0.475706
1	69700001	69800000	0.527255
1	69750001	69850000	0.48674
1	100350001	100450000	0.49654
1	100400001	100500000	0.524656
1	100450001	100550000	0.520846
1	100500001	100600000	0.477374
1	101700001	101800000	0.455141
1	104600001	104700000	0.502796
1	104650001	104750000	0.458942
1	104750001	104850000	0.517527
1	104800001	104900000	0.445081
1	104850001	104950000	0.44475
1	104900001	105000000	0.53507
1	104950001	105050000	0.558407
1	105000001	105100000	0.554349
1	105050001	105150000	0.546758
1	105100001	105200000	0.605398
1	105150001	105250000	0.637821
1	105200001	105300000	0.596559
1	105250001	105350000	0.509863
1	105800001	105900000	0.453579
1	105850001	105950000	0.497341
1	106250001	106350000	0.495985
1	106300001	106400000	0.498793
1	106350001	106450000	0.475916
1	107000001	107100000	0.475193
1	107150001	107250000	0.446131
1	107200001	107300000	0.445715
1	107300001	107400000	0.451937
1	107350001	107450000	0.476418
1	107400001	107500000	0.49596
1	107450001	107550000	0.477426
1	107500001	107600000	0.45304
1	107650001	107750000	0.44903
1	108400001	108500000	0.448923
1	108450001	108550000	0.458046
1	108500001	108600000	0.524876
1	108550001	108650000	0.524518
1	108600001	108700000	0.499688
1	108800001	108900000	0.495422
1	108850001	108950000	0.524771
1	108900001	109000000	0.447747
1	109400001	109500000	0.452165
1	109700001	109800000	0.449532
1	109750001	109850000	0.51793
1	109800001	109900000	0.476297
1	109850001	109950000	0.482002
1	109900001	110000000	0.535387
1	109950001	110050000	0.546067
1	110000001	110100000	0.579094
1	110050001	110150000	0.54634
1	110100001	110200000	0.530938
1	110150001	110250000	0.52407
1	111000001	111100000	0.4897
1	111050001	111150000	0.53358
1	113800001	113900000	0.460496
1	113850001	113950000	0.499387
1	113900001	114000000	0.472546
1	113950001	114050000	0.453354
1	114000001	114100000	0.464695
1	114050001	114150000	0.465779
1	118900001	119000000	0.479017
1	118950001	119050000	0.502151
1	119000001	119100000	0.486801
1	119050001	119150000	0.486965
1	119100001	119200000	0.505654
1	119150001	119250000	0.514464
1	119700001	119800000	0.480019
1	119750001	119850000	0.445528
1	119950001	120050000	0.45328
1	120000001	120100000	0.539562
1	120050001	120150000	0.587781
1	120100001	120200000	0.578957
1	120150001	120250000	0.525128
1	120200001	120300000	0.478603
1	120250001	120350000	0.519491
1	120300001	120400000	0.520517
1	120500001	120600000	0.495026
1	120550001	120650000	0.479295
1	120700001	120800000	0.472646
1	120900001	121000000	0.453342
1	120950001	121050000	0.467508
1	121700001	121800000	0.473342
1	121750001	121850000	0.541167
1	121800001	121900000	0.509621
1	121850001	121950000	0.467783
1	121900001	122000000	0.448311
1	121950001	122050000	0.455725
1	122000001	122100000	0.463628
1	122050001	122150000	0.478439
1	122100001	122200000	0.456167
1	122250001	122350000	0.458565
1	122550001	122650000	0.464268
1	122600001	122700000	0.508767
1	122650001	122750000	0.453901
1	122750001	122850000	0.448587
1	123000001	123100000	0.482233
1	124750001	124850000	0.489853
1	125700001	125800000	0.499493
1	125750001	125850000	0.511839
1	125800001	125900000	0.479828
1	127350001	127450000	0.468507
1	128150001	128250000	0.476648
1	128200001	128300000	0.465205
1	130150001	130250000	0.494799
1	132650001	132750000	0.479393
1	132700001	132800000	0.483279
1	132750001	132850000	0.527173
1	132800001	132900000	0.565956
1	132850001	132950000	0.561143
1	132900001	133000000	0.560266
1	132950001	133050000	0.556842
1	133000001	133100000	0.459926
1	133300001	133400000	0.495076
1	133350001	133450000	0.469768
1	133450001	133550000	0.50241
1	133500001	133600000	0.545153
1	133550001	133650000	0.478632
1	133700001	133800000	0.449909
1	134200001	134300000	0.450697
1	134550001	134650000	0.537392
1	134600001	134700000	0.522454
1	135000001	135100000	0.464037
1	135200001	135300000	0.485226
1	135250001	135350000	0.465501
1	135300001	135400000	0.47932
1	135600001	135700000	0.501331
1	135650001	135750000	0.563874
1	135700001	135800000	0.609653
1	135750001	135850000	0.594736
1	135800001	135900000	0.546747
1	136600001	136700000	0.501691
1	136650001	136750000	0.476226
1	136700001	136800000	0.463111
1	136750001	136850000	0.53702
1	136800001	136900000	0.585911
1	136850001	136950000	0.495173
1	136950001	137050000	0.447466
1	137000001	137100000	0.466014
1	137050001	137150000	0.464746
1	137100001	137200000	0.475516
1	142100001	142200000	0.523793
1	142150001	142250000	0.517813
1	142200001	142300000	0.475034
1	142250001	142350000	0.505953
1	142300001	142400000	0.524627
1	142350001	142450000	0.514177
1	142400001	142500000	0.513827
1	142450001	142550000	0.491324
1	142500001	142600000	0.477196
1	142550001	142650000	0.464263
1	142600001	142700000	0.475503
1	142650001	142750000	0.487664
1	142700001	142800000	0.47779
1	142750001	142850000	0.483243
1	142800001	142900000	0.470433
1	143450001	143550000	0.485025
1	144550001	144650000	0.464727
1	149850001	149950000	0.486193
1	150600001	150700000	0.542649
1	150650001	150750000	0.498992
1	151200001	151300000	0.49095
1	152750001	152850000	0.452178
1	153200001	153300000	0.447229
1	153250001	153350000	0.451792
1	154350001	154450000	0.467445
1	154400001	154500000	0.568984
1	154450001	154550000	0.50303
1	154500001	154600000	0.462519
1	154550001	154650000	0.464775
1	155850001	155950000	0.451443
1	156950001	157050000	0.490818
1	157100001	157200000	0.453582
1	157150001	157250000	0.480217
1	157200001	157300000	0.481572
1	157250001	157350000	0.460357
1	157300001	157400000	0.493889
1	157350001	157450000	0.449344
1	157650001	157750000	0.467165
1	157700001	157800000	0.505238
1	158100001	158200000	0.453238
1	158150001	158250000	0.447953
1	160600001	160700000	0.508204
1	160650001	160750000	0.526499
1	160700001	160800000	0.567043
1	160750001	160850000	0.546807
1	160800001	160900000	0.521292
1	160850001	160950000	0.453221
1	161100001	161200000	0.505107
1	161150001	161250000	0.477403
1	161850001	161950000	0.46225
1	161900001	162000000	0.468808
1	161950001	162050000	0.455456
1	162350001	162450000	0.503402
1	162400001	162500000	0.495026
1	162750001	162850000	0.45377
1	163500001	163600000	0.493657
1	163550001	163650000	0.513628
1	168550001	168650000	0.447942
1	168600001	168700000	0.479969
1	171550001	171650000	0.490821
1	171600001	171700000	0.499048
1	171750001	171850000	0.488634
1	172000001	172100000	0.555009
1	172050001	172150000	0.450286
1	172800001	172900000	0.475484
1	172850001	172950000	0.493068
1	173000001	173100000	0.492375
1	173050001	173150000	0.507427
1	174400001	174500000	0.549918
1	174450001	174550000	0.574524
1	174500001	174600000	0.471845
1	174550001	174650000	0.48047
1	174600001	174700000	0.455051
1	175550001	175650000	0.495343
1	175900001	176000000	0.461221
1	177350001	177450000	0.464774
1	177550001	177650000	0.458811
1	177600001	177700000	0.508384
1	177650001	177750000	0.521289
1	177700001	177800000	0.492159
1	178650001	178750000	0.516593
1	178700001	178800000	0.562024
1	178750001	178850000	0.461074
1	179300001	179400000	0.583481
1	179350001	179450000	0.607151
1	179400001	179500000	0.60159
1	179450001	179550000	0.573287
1	179500001	179600000	0.549563
1	179550001	179650000	0.562266
1	179600001	179700000	0.6072
1	179650001	179750000	0.586995
1	179700001	179800000	0.512923
1	179750001	179850000	0.492127
1	179800001	179900000	0.485036
1	180150001	180250000	0.483166
1	180600001	180700000	0.45835
1	185800001	185900000	0.548203
1	185850001	185950000	0.520834
1	185900001	186000000	0.500067
1	186150001	186250000	0.500711
1	186200001	186300000	0.533831
1	186250001	186350000	0.449477
1	186350001	186450000	0.522984
1	186400001	186500000	0.489123
1	186450001	186550000	0.462562
1	186700001	186800000	0.504854
1	186750001	186850000	0.450013
1	186800001	186900000	0.463691
1	186900001	187000000	0.45496
1	186950001	187050000	0.489292
1	187000001	187100000	0.509779
1	187050001	187150000	0.497173
1	187400001	187500000	0.482025
1	187450001	187550000	0.520373
1	187500001	187600000	0.478585
1	187650001	187750000	0.475381
1	187700001	187800000	0.471753
1	187750001	187850000	0.489291
1	188900001	189000000	0.480898
1	188950001	189050000	0.483821
1	189000001	189100000	0.456979
1	190050001	190150000	0.483705
1	190100001	190200000	0.516903
1	191200001	191300000	0.453367
1	191800001	191900000	0.500833
1	191850001	191950000	0.452409
1	193700001	193800000	0.467701
1	193750001	193850000	0.457574
1	194450001	194550000	0.445343
1	195800001	195900000	0.452468
1	196350001	196450000	0.464454
1	196450001	196550000	0.55296
1	196500001	196600000	0.56547
1	196650001	196750000	0.543924
1	196700001	196800000	0.600308
1	196750001	196850000	0.523284
1	196800001	196900000	0.466872
1	196850001	196950000	0.510861
1	196900001	197000000	0.519565
1	198050001	198150000	0.551971
1	198100001	198200000	0.541328
1	198150001	198250000	0.482185
1	198200001	198300000	0.451019
1	198250001	198350000	0.45143
1	198300001	198400000	0.512041
1	198350001	198450000	0.478033
1	198400001	198500000	0.446173
1	199150001	199250000	0.462849
1	199250001	199350000	0.456196
1	199400001	199500000	0.50602
1	199450001	199550000	0.498409
1	199600001	199700000	0.455109
1	199700001	199800000	0.449903
1	200250001	200350000	0.483264
1	200300001	200400000	0.49759
1	200350001	200450000	0.486179
1	200500001	200600000	0.461824
1	200550001	200650000	0.448878
1	200600001	200700000	0.468303
1	200650001	200750000	0.545206
1	200700001	200800000	0.532501
1	200750001	200850000	0.506287
1	200800001	200900000	0.464542
1	201250001	201350000	0.453071
1	201300001	201400000	0.458678
1	201450001	201550000	0.462705
1	201950001	202050000	0.453971
1	202400001	202500000	0.495329
1	202450001	202550000	0.469838
1	202500001	202600000	0.53716
1	202550001	202650000	0.557289
1	202600001	202700000	0.461281
1	203150001	203250000	0.499991
1	203200001	203300000	0.540068
1	203250001	203350000	0.508762
1	203500001	203600000	0.463264
1	203650001	203750000	0.60699
1	203700001	203800000	0.690282
1	203750001	203850000	0.643702
1	203800001	203900000	0.589318
1	203850001	203950000	0.51439
1	203900001	204000000	0.482891
1	203950001	204050000	0.483103
1	204000001	204100000	0.46318
1	205350001	205450000	0.449362
1	206000001	206100000	0.447733
1	219350001	219450000	0.445749
1	219400001	219500000	0.444664
1	219850001	219950000	0.478629
1	219900001	220000000	0.453826
1	220000001	220100000	0.475002
1	220150001	220250000	0.516398
1	220200001	220300000	0.484919
1	222150001	222250000	0.470103
1	222300001	222400000	0.445951
1	222800001	222900000	0.45753
1	222850001	222950000	0.479747
1	223100001	223200000	0.477836
1	223200001	223300000	0.444801
1	223250001	223350000	0.510535
1	223300001	223400000	0.578937
1	223350001	223450000	0.583417
1	223400001	223500000	0.513866
1	223450001	223550000	0.447409
1	223500001	223600000	0.473927
1	223650001	223750000	0.457395
1	223700001	223800000	0.49532
1	223750001	223850000	0.474031
1	223950001	224050000	0.547448
1	224000001	224100000	0.576804
1	224050001	224150000	0.556569
1	224100001	224200000	0.494505
1	224250001	224350000	0.465838
1	224350001	224450000	0.445178
1	224600001	224700000	0.449694
1	224650001	224750000	0.47413
1	224800001	224900000	0.470874
1	225500001	225600000	0.484373
1	225550001	225650000	0.622414
1	225600001	225700000	0.663095
1	225650001	225750000	0.648853
1	225700001	225800000	0.642513
1	225750001	225850000	0.62998
1	225800001	225900000	0.544795
1	226500001	226600000	0.474969
1	226600001	226700000	0.498375
1	226650001	226750000	0.48674
1	226750001	226850000	0.464165
1	227250001	227350000	0.516088
1	227300001	227400000	0.471708
1	227350001	227450000	0.499389
1	227400001	227500000	0.527916
1	227750001	227850000	0.452214
1	227800001	227900000	0.468968
1	227850001	227950000	0.485454
1	227900001	228000000	0.518461
1	228100001	228200000	0.515381
1	228150001	228250000	0.551426
1	228200001	228300000	0.587794
1	228250001	228350000	0.582618
1	228300001	228400000	0.485896
1	228350001	228450000	0.466236
1	228550001	228650000	0.449834
1	228600001	228700000	0.452751
1	228700001	228800000	0.470549
1	228750001	228850000	0.520691
1	228800001	228900000	0.552626
1	229150001	229250000	0.447697
1	229200001	229300000	0.474889
1	229750001	229850000	0.452861
1	231000001	231100000	0.451622
1	231050001	231150000	0.49686
1	231400001	231500000	0.526199
1	231450001	231550000	0.577135
1	231650001	231750000	0.457017
1	231700001	231800000	0.477507
1	231750001	231850000	0.475156
1	231800001	231900000	0.446363
1	232100001	232200000	0.469404
1	232150001	232250000	0.609624
1	232200001	232300000	0.568743
1	232250001	232350000	0.46992
1	232300001	232400000	0.499573
1	232350001	232450000	0.533851
1	232400001	232500000	0.489123
1	232550001	232650000	0.502316
1	232600001	232700000	0.494227
1	232650001	232750000	0.56279
1	232700001	232800000	0.606317
1	232750001	232850000	0.512503
1	232850001	232950000	0.486765
1	232900001	233000000	0.629775
1	232950001	233050000	0.604917
1	233000001	233100000	0.607634
1	233050001	233150000	0.607502
1	233100001	233200000	0.586577
1	233150001	233250000	0.582577
1	233200001	233300000	0.549149
1	233250001	233350000	0.624484
1	233300001	233400000	0.632065
1	233350001	233450000	0.487172
1	233400001	233500000	0.621464
1	233450001	233550000	0.606936
1	233900001	234000000	0.562106
1	233950001	234050000	0.584374
1	235700001	235800000	0.493667
1	236350001	236450000	0.473961
1	236400001	236500000	0.480989
1	236500001	236600000	0.461195
1	236550001	236650000	0.501453
1	236600001	236700000	0.486538
1	236650001	236750000	0.464604
1	240050001	240150000	0.480856
1	240100001	240200000	0.451402
1	240350001	240450000	0.478143
1	241150001	241250000	0.46755
1	241200001	241300000	0.487183
1	241250001	241350000	0.467756
1	241300001	241400000	0.509453
1	241350001	241450000	0.575923
1	241400001	241500000	0.52099
1	241650001	241750000	0.489636
1	241700001	241800000	0.534373
1	241750001	241850000	0.541362
1	241800001	241900000	0.534782
1	241850001	241950000	0.502251
1	242400001	242500000	0.459839
1	242450001	242550000	0.578297
1	242500001	242600000	0.576125
1	242550001	242650000	0.453849
1	242700001	242800000	0.480982
1	242750001	242850000	0.585405
1	242800001	242900000	0.62661
1	243800001	243900000	0.452415
1	243850001	243950000	0.473243
1	243900001	244000000	0.490973
1	243950001	244050000	0.51892
1	244000001	244100000	0.585112
1	244050001	244150000	0.6089
1	244100001	244200000	0.529629
1	244150001	244250000	0.484861
1	244350001	244450000	0.469535
1	244400001	244500000	0.450735
1	244600001	244700000	0.444906
1	245750001	245850000	0.496424
1	245800001	245900000	0.516322
1	245850001	245950000	0.475584
1	246050001	246150000	0.496026
1	246250001	246350000	0.457874
1	246300001	246400000	0.508812
1	246350001	246450000	0.531261
1	246400001	246500000	0.517948
1	247000001	247100000	0.497677
1	247350001	247450000	0.524544
2	1250001	1350000	0.547413
2	1300001	1400000	0.541251
2	1750001	1850000	0.461447
2	13650001	13750000	0.512864
2	77000001	77100000	0.483645
2	77050001	77150000	0.4807
2	77100001	77200000	0.458669
2	77550001	77650000	0.446642
2	78200001	78300000	0.444759
2	78350001	78450000	0.468346
2	78400001	78500000	0.465312
2	78600001	78700000	0.448339
2	78700001	78800000	0.454237
2	78750001	78850000	0.507485
2	78950001	79050000	0.489825
2	79000001	79100000	0.48174
2	79650001	79750000	0.508066
2	79800001	79900000	0.496198
2	80050001	80150000	0.450085
2	80100001	80200000	0.54445
2	80150001	80250000	0.487598
2	80300001	80400000	0.446055
2	80350001	80450000	0.474671
2	80850001	80950000	0.48858
2	80900001	81000000	0.527948
2	80950001	81050000	0.538011
2	81000001	81100000	0.515018
2	81050001	81150000	0.500717
2	81100001	81200000	0.548195
2	81150001	81250000	0.50797
2	81500001	81600000	0.523127
2	81550001	81650000	0.490851
2	83250001	83350000	0.476236
2	83400001	83500000	0.507004
2	84400001	84500000	0.511604
2	84450001	84550000	0.536682
2	84500001	84600000	0.4819
2	84700001	84800000	0.492453
2	85250001	85350000	0.463859
2	85300001	85400000	0.497119
2	85350001	85450000	0.498744
2	85800001	85900000	0.480177
2	85850001	85950000	0.524375
2	85950001	86050000	0.453043
2	141200001	141300000	0.51528
2	142150001	142250000	0.487062
2	142300001	142400000	0.451659
2	146500001	146600000	0.449595
3	37250001	37350000	0.456024
3	37300001	37400000	0.448208
3	37450001	37550000	0.448625
3	37500001	37600000	0.458707
3	37550001	37650000	0.503799
3	37600001	37700000	0.457101
3	37750001	37850000	0.453641
3	37950001	38050000	0.459651
3	38000001	38100000	0.507446
3	38050001	38150000	0.502806
3	38100001	38200000	0.451982
3	38750001	38850000	0.45211
3	38800001	38900000	0.482116
3	38850001	38950000	0.477072
3	38900001	39000000	0.450523
3	38950001	39050000	0.458205
3	39000001	39100000	0.520222
3	39050001	39150000	0.569146
3	39100001	39200000	0.562028
3	39150001	39250000	0.574014
3	39200001	39300000	0.572575
3	39250001	39350000	0.572666
3	39300001	39400000	0.574021
3	39350001	39450000	0.58113
3	39400001	39500000	0.582019
3	39450001	39550000	0.576442
3	39500001	39600000	0.571055
3	39550001	39650000	0.568297
3	39600001	39700000	0.584059
3	39650001	39750000	0.559926
3	39700001	39800000	0.537571
3	39750001	39850000	0.527156
3	39800001	39900000	0.517945
3	39850001	39950000	0.536167
3	39900001	40000000	0.534439
3	39950001	40050000	0.510853
3	40000001	40100000	0.524077
3	40050001	40150000	0.555343
3	40100001	40200000	0.551784
3	40150001	40250000	0.530058
3	40200001	40300000	0.535
3	40250001	40350000	0.555189
3	40300001	40400000	0.567784
3	40350001	40450000	0.574022
3	40400001	40500000	0.558918
3	40450001	40550000	0.535055
3	40500001	40600000	0.539472
3	40550001	40650000	0.54221
3	40600001	40700000	0.521474
3	40650001	40750000	0.524971
3	40700001	40800000	0.526488
3	40750001	40850000	0.529115
3	40800001	40900000	0.516828
3	40850001	40950000	0.513055
3	40900001	41000000	0.516214
3	40950001	41050000	0.524956
3	41000001	41100000	0.534465
3	41050001	41150000	0.548756
3	41100001	41200000	0.556565
3	41150001	41250000	0.535062
3	41200001	41300000	0.514529
3	41250001	41350000	0.515378
3	41300001	41400000	0.525552
3	41350001	41450000	0.550201
3	41400001	41500000	0.57783
3	41450001	41550000	0.546547
3	41850001	41950000	0.498694
3	41900001	42000000	0.545474
3	41950001	42050000	0.496818
3	42150001	42250000	0.461879
3	42200001	42300000	0.542461
3	42250001	42350000	0.563648
3	42300001	42400000	0.555498
3	42350001	42450000	0.528995
3	42400001	42500000	0.448912
3	43300001	43400000	0.511135
3	43350001	43450000	0.474984
3	43600001	43700000	0.533585
3	43650001	43750000	0.551078
3	43700001	43800000	0.566987
3	43750001	43850000	0.554303
3	43800001	43900000	0.525093
3	43950001	44050000	0.471086
3	44000001	44100000	0.482495
3	44500001	44600000	0.480786
3	45150001	45250000	0.454615
3	45200001	45300000	0.476947
3	69950001	70050000	0.47001
3	70000001	70100000	0.563519
3	70050001	70150000	0.543686
3	71150001	71250000	0.541934
3	71200001	71300000	0.625172
3	71250001	71350000	0.688302
3	71300001	71400000	0.673583
3	71350001	71450000	0.652364
3	71400001	71500000	0.654047
3	71450001	71550000	0.476039
3	72050001	72150000	0.467548
3	72250001	72350000	0.459437
3	72300001	72400000	0.565644
3	72350001	72450000	0.589531
3	72400001	72500000	0.607017
3	72450001	72550000	0.543339
3	72650001	72750000	0.445047
3	72700001	72800000	0.450362
3	72850001	72950000	0.453332
3	72900001	73000000	0.459311
3	72950001	73050000	0.453167
3	73000001	73100000	0.45749
3	73050001	73150000	0.503583
3	73100001	73200000	0.474801
3	73150001	73250000	0.51718
3	73200001	73300000	0.578029
3	73250001	73350000	0.630179
3	73300001	73400000	0.52307
3	73400001	73500000	0.487672
3	73450001	73550000	0.539361
3	73600001	73700000	0.490775
3	73650001	73750000	0.534519
3	73700001	73800000	0.59068
3	73750001	73850000	0.626924
3	73800001	73900000	0.544422
3	74200001	74300000	0.469818
3	74250001	74350000	0.453572
3	77200001	77300000	0.461438
3	77750001	77850000	0.447661
3	108800001	108900000	0.484428
3	114000001	114100000	0.496074
3	114050001	114150000	0.495063
3	114100001	114200000	0.445909
4	5950001	6050000	0.480805
4	6000001	6100000	0.570735
4	6050001	6150000	0.534532
4	6300001	6400000	0.471429
4	25000001	25100000	0.464419
4	73750001	73850000	0.497842
4	73900001	74000000	0.460172
4	73950001	74050000	0.454572
4	74450001	74550000	0.511521
4	76750001	76850000	0.467414
4	76800001	76900000	0.473085
4	76850001	76950000	0.461217
4	76900001	77000000	0.58662
4	76950001	77050000	0.504791
4	77200001	77300000	0.447024
4	77250001	77350000	0.448885
4	77850001	77950000	0.458984
4	78550001	78650000	0.478258
4	78600001	78700000	0.516878
4	79000001	79100000	0.447701
4	79050001	79150000	0.511065
4	79100001	79200000	0.503279
4	79150001	79250000	0.46738
4	79400001	79500000	0.449588
4	79500001	79600000	0.4827
4	79550001	79650000	0.572623
4	79600001	79700000	0.5705
4	79650001	79750000	0.460476
4	79800001	79900000	0.479579
4	79850001	79950000	0.635787
4	79900001	80000000	0.664055
4	79950001	80050000	0.673409
4	80000001	80100000	0.668665
4	80050001	80150000	0.623508
4	80100001	80200000	0.556415
4	80150001	80250000	0.533693
4	80200001	80300000	0.591588
4	80250001	80350000	0.643212
4	80300001	80400000	0.609066
4	80500001	80600000	0.454867
4	80550001	80650000	0.506714
4	80600001	80700000	0.526449
4	80800001	80900000	0.464547
4	80850001	80950000	0.501004
4	81250001	81350000	0.446582
4	81300001	81400000	0.448029
4	82000001	82100000	0.504834
4	82050001	82150000	0.57105
4	82200001	82300000	0.484814
4	82250001	82350000	0.484401
4	82600001	82700000	0.628536
4	82650001	82750000	0.692985
4	82700001	82800000	0.691966
4	82750001	82850000	0.659045
4	82800001	82900000	0.654091
4	82850001	82950000	0.59492
4	82900001	83000000	0.588555
4	82950001	83050000	0.577406
4	83000001	83100000	0.478141
4	83050001	83150000	0.501789
4	83100001	83200000	0.563622
4	83150001	83250000	0.530536
4	83200001	83300000	0.448312
4	94700001	94800000	0.458545
4	94750001	94850000	0.455189
5	750001	850000	0.475452
5	800001	900000	0.465531
5	3950001	4050000	0.504509
5	4000001	4100000	0.53126
5	12150001	12250000	0.472944
5	12200001	12300000	0.52147
5	12250001	12350000	0.462616
5	12300001	12400000	0.462656
5	58000001	58100000	0.489167
5	58050001	58150000	0.503975
5	58100001	58200000	0.493
5	58150001	58250000	0.444944
5	81700001	81800000	0.452897
5	81850001	81950000	0.495109
5	81900001	82000000	0.508199
5	81950001	82050000	0.459359
5	82100001	82200000	0.477043
5	82150001	82250000	0.446695
5	82200001	82300000	0.449932
5	82250001	82350000	0.497115
5	82300001	82400000	0.473163
5	82350001	82450000	0.445322
5	82400001	82500000	0.473811
5	82450001	82550000	0.468581
5	87700001	87800000	0.454012
5	88400001	88500000	0.491246
5	101400001	101500000	0.479413
5	101450001	101550000	0.475681
6	1	100000	0.560509
6	50001	150000	0.588057
6	100001	200000	0.732906
6	150001	250000	0.868024
6	200001	300000	0.928162
6	250001	350000	0.88617
6	300001	400000	0.584372
6	350001	450000	0.591632
6	400001	500000	0.664616
6	450001	550000	0.646978
6	500001	600000	0.630884
6	550001	650000	0.539405
6	600001	700000	0.533254
6	650001	750000	0.639937
6	700001	800000	0.744009
6	750001	850000	0.720101
6	800001	900000	0.46924
6	900001	1000000	0.505129
6	950001	1050000	0.534788
6	1000001	1100000	0.507546
6	1050001	1150000	0.480443
6	1100001	1200000	0.476944
6	1150001	1250000	0.45854
6	1200001	1300000	0.489109
6	1250001	1350000	0.562144
6	1300001	1400000	0.488472
6	2400001	2500000	0.478224
6	2450001	2550000	0.543253
6	2500001	2600000	0.555687
6	2550001	2650000	0.45765
6	8850001	8950000	0.501541
6	8900001	9000000	0.48998
6	8950001	9050000	0.460888
6	9000001	9100000	0.471375
6	9200001	9300000	0.513513
6	9250001	9350000	0.517268
6	9300001	9400000	0.451091
6	9500001	9600000	0.566603
6	9550001	9650000	0.571924
6	9600001	9700000	0.573343
6	9650001	9750000	0.53106
6	9700001	9800000	0.573887
6	9750001	9850000	0.605201
6	9800001	9900000	0.583173
6	9850001	9950000	0.462528
6	10150001	10250000	0.452849
6	10200001	10300000	0.516624
6	10250001	10350000	0.566097
6	10300001	10400000	0.653473
6	10350001	10450000	0.660108
6	10400001	10500000	0.548897
6	10450001	10550000	0.585632
6	10500001	10600000	0.634578
6	10550001	10650000	0.533877
6	10600001	10700000	0.457714
6	10800001	10900000	0.491855
6	10850001	10950000	0.479446
6	11050001	11150000	0.449622
6	33450001	33550000	0.46366
6	33500001	33600000	0.454822
6	33650001	33750000	0.46482
6	36350001	36450000	0.477528
6	36400001	36500000	0.448778
6	36850001	36950000	0.511991
6	36900001	37000000	0.571464
6	36950001	37050000	0.597038
6	37000001	37100000	0.528394
6	37050001	37150000	0.473782
6	37450001	37550000	0.451724
6	37500001	37600000	0.497552
6	37550001	37650000	0.542135
6	48800001	48900000	0.472106
6	48850001	48950000	0.532025
6	48900001	49000000	0.598293
6	48950001	49050000	0.592177
6	49000001	49100000	0.621584
6	49050001	49150000	0.5213
6	49550001	49650000	0.446229
6	49600001	49700000	0.522013
6	49650001	49750000	0.518041
6	49900001	50000000	0.457519
6	49950001	50050000	0.510949
6	50000001	50100000	0.47197
6	50050001	50150000	0.474519
6	50100001	50200000	0.449763
6	50800001	50900000	0.474163
6	53100001	53200000	0.451517
6	53150001	53250000	0.540662
6	53200001	53300000	0.546524
6	53250001	53350000	0.477426
6	53300001	53400000	0.489111
6	53350001	53450000	0.485438
6	53450001	53550000	0.483817
6	53500001	53600000	0.548654
6	53550001	53650000	0.496667
6	53700001	53800000	0.453033
6	53750001	53850000	0.498624
6	53800001	53900000	0.501757
6	54000001	54100000	0.445869
6	54050001	54150000	0.481145
6	54150001	54250000	0.469899
6	54200001	54300000	0.556299
6	54250001	54350000	0.556319
6	54300001	54400000	0.534633
6	54350001	54450000	0.500233
6	54400001	54500000	0.535261
6	54450001	54550000	0.533439
6	54500001	54600000	0.535326
6	54550001	54650000	0.532107
6	54600001	54700000	0.527786
6	72100001	72200000	0.507454
6	72150001	72250000	0.546612
6	72200001	72300000	0.570754
6	72250001	72350000	0.636668
6	72300001	72400000	0.502132
6	73050001	73150000	0.466831
6	73100001	73200000	0.56664
6	73150001	73250000	0.454158
6	74600001	74700000	0.479198
6	74950001	75050000	0.454888
6	75400001	75500000	0.472677
6	84150001	84250000	0.44895
6	85050001	85150000	0.493077
6	85100001	85200000	0.556205
6	88950001	89050000	0.448031
6	89600001	89700000	0.450518
6	89700001	89800000	0.460028
6	91650001	91750000	0.461509
6	92000001	92100000	0.477508
6	92050001	92150000	0.688936
6	92100001	92200000	0.620556
6	92350001	92450000	0.567339
6	92400001	92500000	0.605918
6	92450001	92550000	0.586622
6	92500001	92600000	0.545768
6	92550001	92650000	0.479171
6	93000001	93100000	0.47959
6	93050001	93150000	0.553667
6	93100001	93200000	0.565325
6	93150001	93250000	0.59271
6	93200001	93300000	0.584029
6	93250001	93350000	0.594088
6	93300001	93400000	0.684407
6	93350001	93450000	0.565955
6	93400001	93500000	0.566096
6	93450001	93550000	0.664025
6	93500001	93600000	0.592696
6	93550001	93650000	0.609381
6	93600001	93700000	0.563498
6	93650001	93750000	0.645138
6	93700001	93800000	0.652581
6	93750001	93850000	0.635479
6	93800001	93900000	0.685222
6	93850001	93950000	0.672434
6	93900001	94000000	0.62424
6	93950001	94050000	0.631525
6	94000001	94100000	0.523163
6	94200001	94300000	0.486905
6	94250001	94350000	0.449148
6	100300001	100400000	0.46177
6	102000001	102100000	0.453511
6	103300001	103400000	0.465589
6	103350001	103450000	0.479026
6	103400001	103500000	0.463737
6	103600001	103700000	0.462536
6	103650001	103750000	0.484523
6	103750001	103850000	0.473511
6	103800001	103900000	0.491277
6	104250001	104350000	0.475732
6	104300001	104400000	0.526185
6	104350001	104450000	0.449775
6	104400001	104500000	0.494574
6	104450001	104550000	0.53804
6	104500001	104600000	0.456307
6	104700001	104800000	0.556904
6	104750001	104850000	0.682936
6	104800001	104900000	0.571585
6	104850001	104950000	0.491606
6	105300001	105400000	0.467327
6	105350001	105450000	0.529953
6	105400001	105500000	0.534513
6	105450001	105550000	0.581347
6	105500001	105600000	0.636727
6	105550001	105650000	0.749233
6	105600001	105700000	0.675543
6	105650001	105750000	0.518749
6	105800001	105900000	0.491353
6	105850001	105950000	0.478722
6	105900001	106000000	0.489284
6	105950001	106050000	0.491743
6	106000001	106100000	0.557212
6	106050001	106150000	0.641965
6	106100001	106200000	0.66794
6	106150001	106250000	0.683531
6	106200001	106300000	0.701086
6	106250001	106350000	0.605035
6	106300001	106400000	0.532347
6	106350001	106450000	0.533786
6	106400001	106500000	0.653197
6	106450001	106550000	0.687053
6	106500001	106600000	0.687575
6	106550001	106650000	0.72551
6	106600001	106700000	0.735941
6	106650001	106750000	0.712267
6	106700001	106800000	0.672237
6	106750001	106850000	0.657196
6	106800001	106900000	0.655931
6	106850001	106950000	0.642475
6	106900001	107000000	0.702142
6	106950001	107050000	0.750329
6	107000001	107100000	0.69728
6	107050001	107150000	0.576441
6	107100001	107200000	0.540103
6	107150001	107250000	0.598398
6	107200001	107300000	0.554869
6	107250001	107350000	0.514122
6	107300001	107400000	0.512056
6	107350001	107450000	0.538943
6	107400001	107500000	0.61564
6	107450001	107550000	0.702694
6	107500001	107600000	0.561335
6	107650001	107750000	0.453958
6	107800001	107900000	0.511241
6	107850001	107950000	0.636958
6	107900001	108000000	0.661188
6	108400001	108500000	0.479271
6	108450001	108550000	0.567716
6	108500001	108600000	0.552912
6	108550001	108650000	0.542082
6	108600001	108700000	0.505312
6	108650001	108750000	0.524308
6	108700001	108800000	0.514787
6	108750001	108850000	0.45268
6	108800001	108900000	0.456798
6	108850001	108950000	0.490533
6	109000001	109100000	0.459003
6	109200001	109300000	0.478269
6	109250001	109350000	0.530368
6	109300001	109400000	0.599553
6	109350001	109450000	0.588627
6	109400001	109500000	0.552262
6	109450001	109550000	0.542824
6	109500001	109600000	0.592563
6	109550001	109650000	0.564361
6	109600001	109700000	0.605965
6	109650001	109750000	0.597351
6	109700001	109800000	0.553448
6	109750001	109850000	0.554752
6	109800001	109900000	0.461391
6	109900001	110000000	0.533233
6	109950001	110050000	0.593305
6	110000001	110100000	0.612756
6	110050001	110150000	0.562719
6	110100001	110200000	0.522968
6	110150001	110250000	0.647998
6	110200001	110300000	0.681649
6	110250001	110350000	0.642046
6	110300001	110400000	0.646579
6	110350001	110450000	0.650296
6	110400001	110500000	0.67559
6	110450001	110550000	0.645645
6	110500001	110600000	0.50544
6	110600001	110700000	0.469663
6	110650001	110750000	0.541585
6	110750001	110850000	0.473565
6	110800001	110900000	0.632372
6	110850001	110950000	0.658301
6	110900001	111000000	0.601569
6	110950001	111050000	0.504516
6	111000001	111100000	0.544471
6	111050001	111150000	0.448416
6	111100001	111200000	0.470505
6	111150001	111250000	0.51263
6	111200001	111300000	0.487788
6	111250001	111350000	0.517699
6	111300001	111400000	0.46
6	111350001	111450000	0.583106
6	111400001	111500000	0.506277
6	111700001	111800000	0.581494
6	111750001	111850000	0.588893
6	111800001	111900000	0.54552
6	111850001	111950000	0.538897
6	111900001	112000000	0.506745
6	111950001	112050000	0.472023
6	112350001	112450000	0.544018
6	112400001	112500000	0.446813
6	112450001	112550000	0.463536
6	112500001	112600000	0.572653
6	112550001	112650000	0.562582
6	112700001	112800000	0.463825
6	112850001	112950000	0.466251
6	113150001	113250000	0.486512
6	113200001	113300000	0.566918
6	113250001	113350000	0.633194
6	113300001	113400000	0.653524
6	113350001	113450000	0.611483
6	113400001	113500000	0.635029
6	113450001	113550000	0.629966
6	113500001	113600000	0.721325
6	113550001	113650000	0.702236
6	113600001	113700000	0.726
6	113650001	113750000	0.736531
6	113700001	113800000	0.695541
6	113750001	113850000	0.653627
6	113800001	113900000	0.667115
6	113850001	113950000	0.629558
6	113900001	114000000	0.593427
6	113950001	114050000	0.484908
6	114000001	114100000	0.478439
6	114050001	114150000	0.487869
6	114500001	114600000	0.510413
6	114550001	114650000	0.484551
6	114800001	114900000	0.470057
6	115000001	115100000	0.489503
6	115150001	115250000	0.489223
6	116950001	117050000	0.532836
6	117000001	117100000	0.523657
6	117400001	117500000	0.535061
6	117450001	117550000	0.586646
6	117500001	117600000	0.512617
6	118100001	118200000	0.536396
6	118150001	118250000	0.602344
6	118200001	118300000	0.459977
6	118250001	118350000	0.47522
6	118300001	118400000	0.493078
6	118350001	118450000	0.456276
6	118400001	118500000	0.462239
6	119400001	119500000	0.521436
6	147800001	147900000	0.451173
7	1	100000	0.510277
7	50001	150000	0.495508
7	100001	200000	0.550961
7	150001	250000	0.59133
7	200001	300000	0.604293
7	250001	350000	0.613875
7	300001	400000	0.609979
7	350001	450000	0.579036
7	400001	500000	0.573429
7	450001	550000	0.5482
7	500001	600000	0.508777
7	550001	650000	0.48576
7	800001	900000	0.470349
7	850001	950000	0.458732
7	900001	1000000	0.478804
7	950001	1050000	0.476751
7	1000001	1100000	0.489393
7	1050001	1150000	0.494437
7	1950001	2050000	0.491971
7	2000001	2100000	0.530163
7	2050001	2150000	0.47438
7	2700001	2800000	0.449835
7	2750001	2850000	0.511731
7	2800001	2900000	0.535649
7	2850001	2950000	0.559463
7	2900001	3000000	0.487
7	7250001	7350000	0.45064
7	7300001	7400000	0.469642
7	8300001	8400000	0.446029
7	42750001	42850000	0.496733
7	42800001	42900000	0.488556
7	48700001	48800000	0.445029
7	49800001	49900000	0.501222
7	53450001	53550000	0.451846
7	53500001	53600000	0.511017
7	53550001	53650000	0.568346
7	53600001	53700000	0.596985
7	53650001	53750000	0.5742
7	53700001	53800000	0.446392
7	53750001	53850000	0.44543
7	53800001	53900000	0.505406
7	53900001	54000000	0.551461
7	53950001	54050000	0.610203
7	54000001	54100000	0.569974
7	54050001	54150000	0.477656
7	54200001	54300000	0.4786
7	54250001	54350000	0.560089
7	54300001	54400000	0.572151
7	54350001	54450000	0.462876
7	54400001	54500000	0.45126
7	54450001	54550000	0.588759
7	54500001	54600000	0.608106
7	54550001	54650000	0.599876
7	54600001	54700000	0.499809
7	54700001	54800000	0.598857
7	54750001	54850000	0.628638
7	54800001	54900000	0.569144
7	54850001	54950000	0.456129
7	54950001	55050000	0.477491
7	55000001	55100000	0.544198
7	55050001	55150000	0.572988
7	55100001	55200000	0.565407
7	55150001	55250000	0.54898
7	55250001	55350000	0.453853
7	55300001	55400000	0.523974
7	55350001	55450000	0.550935
7	55400001	55500000	0.635551
7	55450001	55550000	0.606697
7	55500001	55600000	0.502609
7	55550001	55650000	0.490449
7	55600001	55700000	0.510932
7	55650001	55750000	0.501003
7	55700001	55800000	0.530478
7	55750001	55850000	0.537354
7	55900001	56000000	0.464556
7	56550001	56650000	0.474913
7	56600001	56700000	0.486989
7	56650001	56750000	0.450329
7	56750001	56850000	0.481787
7	56800001	56900000	0.501098
7	56850001	56950000	0.499192
7	56900001	57000000	0.520353
7	56950001	57050000	0.524291
7	57000001	57100000	0.540349
7	57050001	57150000	0.539026
7	57100001	57200000	0.565327
7	57150001	57250000	0.582344
7	57200001	57300000	0.573689
7	57250001	57350000	0.602879
7	57300001	57400000	0.537481
7	57700001	57800000	0.516859
7	57850001	57950000	0.538976
7	57900001	58000000	0.455238
7	57950001	58050000	0.447324
7	58000001	58100000	0.553995
7	58050001	58150000	0.570366
7	58100001	58200000	0.59311
7	58150001	58250000	0.605975
7	58200001	58300000	0.5992
7	58250001	58350000	0.606377
7	58300001	58400000	0.5347
7	58400001	58500000	0.52469
7	58450001	58550000	0.603082
7	58500001	58600000	0.576872
7	58550001	58650000	0.554837
7	58600001	58700000	0.545865
7	58650001	58750000	0.564174
7	58800001	58900000	0.534004
7	58850001	58950000	0.493435
7	58900001	59000000	0.554868
7	58950001	59050000	0.65699
7	59000001	59100000	0.663993
7	59050001	59150000	0.672199
7	59100001	59200000	0.694526
7	59150001	59250000	0.685863
7	59200001	59300000	0.649106
7	59250001	59350000	0.684196
7	59300001	59400000	0.690304
7	59350001	59450000	0.640586
7	59400001	59500000	0.448351
7	59450001	59550000	0.479587
7	59500001	59600000	0.592257
7	59550001	59650000	0.627454
7	59600001	59700000	0.647663
7	59650001	59750000	0.646782
7	59700001	59800000	0.658152
7	59750001	59850000	0.67262
7	60200001	60300000	0.475029
7	60250001	60350000	0.451663
7	60400001	60500000	0.508605
7	60450001	60550000	0.528415
7	60500001	60600000	0.503339
7	60550001	60650000	0.556973
7	60600001	60700000	0.637697
7	60650001	60750000	0.672776
7	60700001	60800000	0.669369
7	60750001	60850000	0.654977
7	60800001	60900000	0.634746
7	60850001	60950000	0.637096
7	60900001	61000000	0.656079
7	60950001	61050000	0.644744
7	61000001	61100000	0.575321
7	61050001	61150000	0.489089
7	61150001	61250000	0.479756
7	61650001	61750000	0.520281
7	61850001	61950000	0.57141
7	61900001	62000000	0.659619
7	61950001	62050000	0.574391
7	62200001	62300000	0.498497
7	62350001	62450000	0.481927
7	62400001	62500000	0.50188
7	62450001	62550000	0.480195
7	62500001	62600000	0.47354
7	62650001	62750000	0.514859
7	62700001	62800000	0.523117
7	62750001	62850000	0.53275
7	62800001	62900000	0.505233
7	62850001	62950000	0.495849
7	62900001	63000000	0.522313
7	62950001	63050000	0.548347
7	63000001	63100000	0.553403
7	63050001	63150000	0.5147
7	63100001	63200000	0.459845
7	63350001	63450000	0.446577
7	63400001	63500000	0.485408
7	63700001	63800000	0.643448
7	63750001	63850000	0.702424
7	63800001	63900000	0.697277
7	63850001	63950000	0.700432
7	63900001	64000000	0.723223
7	63950001	64050000	0.683
7	64000001	64100000	0.657874
7	64050001	64150000	0.659617
7	64100001	64200000	0.656957
7	64150001	64250000	0.664255
7	64200001	64300000	0.657432
7	64250001	64350000	0.599425
7	64300001	64400000	0.49562
7	64350001	64450000	0.470308
7	64450001	64550000	0.471654
7	64500001	64600000	0.602015
7	64550001	64650000	0.570363
7	64600001	64700000	0.587107
7	64650001	64750000	0.577914
7	64700001	64800000	0.598195
7	64750001	64850000	0.588319
7	64800001	64900000	0.55912
7	64850001	64950000	0.499537
7	64900001	65000000	0.480627
7	64950001	65050000	0.572754
7	65000001	65100000	0.53622
7	65150001	65250000	0.534277
7	65200001	65300000	0.553246
7	65250001	65350000	0.460688
7	65350001	65450000	0.565952
7	65400001	65500000	0.600551
7	65450001	65550000	0.476572
7	65650001	65750000	0.498412
7	65700001	65800000	0.490128
7	65750001	65850000	0.48354
7	66250001	66350000	0.560736
7	66300001	66400000	0.50934
7	66350001	66450000	0.464934
7	66400001	66500000	0.51543
7	66450001	66550000	0.555002
7	66500001	66600000	0.470769
7	66650001	66750000	0.481232
7	66700001	66800000	0.531562
7	66800001	66900000	0.486372
7	66850001	66950000	0.551653
7	66900001	67000000	0.543819
7	66950001	67050000	0.491881
7	67000001	67100000	0.561171
7	67050001	67150000	0.475207
7	67100001	67200000	0.445964
7	67300001	67400000	0.573883
7	67350001	67450000	0.608686
7	67400001	67500000	0.499573
7	67800001	67900000	0.448699
7	67850001	67950000	0.539401
7	67900001	68000000	0.540139
7	67950001	68050000	0.468147
7	68000001	68100000	0.477857
7	68050001	68150000	0.471469
7	68200001	68300000	0.504157
7	68250001	68350000	0.513535
7	68300001	68400000	0.45472
7	71750001	71850000	0.446841
7	75250001	75350000	0.471274
7	75300001	75400000	0.481476
7	75350001	75450000	0.495601
7	75400001	75500000	0.457388
7	75550001	75650000	0.474613
7	75700001	75800000	0.468096
7	75800001	75900000	0.462251
7	75850001	75950000	0.523119
7	75900001	76000000	0.529698
7	75950001	76050000	0.514626
7	76000001	76100000	0.46993
7	76050001	76150000	0.493914
7	76100001	76200000	0.48108
7	76850001	76950000	0.505171
7	78500001	78600000	0.50675
7	78550001	78650000	0.471702
7	78600001	78700000	0.448884
7	103400001	103500000	0.46428
7	103450001	103550000	0.449853
7	103500001	103600000	0.445188
7	103550001	103650000	0.475824
7	103600001	103700000	0.464547
7	106550001	106650000	0.45318
7	106950001	107050000	0.46141
8	3050001	3150000	0.450814
8	3100001	3200000	0.489254
8	3150001	3250000	0.444687
8	12700001	12800000	0.45082
8	12750001	12850000	0.496203
8	12800001	12900000	0.660315
8	12850001	12950000	0.700175
8	12900001	13000000	0.652845
8	12950001	13050000	0.648225
8	13000001	13100000	0.504837
8	13150001	13250000	0.448602
8	17700001	17800000	0.456646
8	17750001	17850000	0.559034
8	17800001	17900000	0.594334
8	17850001	17950000	0.617766
8	17900001	18000000	0.484551
8	20650001	20750000	0.46385
8	21150001	21250000	0.457764
8	21200001	21300000	0.463556
8	21300001	21400000	0.523747
8	21350001	21450000	0.697582
8	21400001	21500000	0.692808
8	21450001	21550000	0.629744
8	21500001	21600000	0.506815
8	21550001	21650000	0.522839
8	21600001	21700000	0.580898
8	21650001	21750000	0.604115
8	21700001	21800000	0.577419
8	21750001	21850000	0.507688
8	21800001	21900000	0.47574
8	21850001	21950000	0.496225
8	21900001	22000000	0.521158
8	21950001	22050000	0.500729
8	22000001	22100000	0.500661
8	22050001	22150000	0.510925
8	22100001	22200000	0.573891
8	22150001	22250000	0.537322
8	22600001	22700000	0.48137
8	22850001	22950000	0.45165
8	24550001	24650000	0.463806
8	25000001	25100000	0.460602
8	25150001	25250000	0.44492
8	25900001	26000000	0.477424
8	27250001	27350000	0.448688
8	35750001	35850000	0.495508
8	35800001	35900000	0.519091
8	36000001	36100000	0.490537
8	36050001	36150000	0.520544
8	36100001	36200000	0.494202
8	36150001	36250000	0.531525
8	36200001	36300000	0.54871
8	36250001	36350000	0.542891
8	36300001	36400000	0.476175
8	36350001	36450000	0.459871
8	36400001	36500000	0.449012
8	36550001	36650000	0.456246
8	36600001	36700000	0.499538
8	36650001	36750000	0.49844
8	36700001	36800000	0.483001
8	36750001	36850000	0.494377
8	36800001	36900000	0.495097
8	36850001	36950000	0.511973
8	36900001	37000000	0.491259
8	36950001	37050000	0.548787
8	37000001	37100000	0.575683
8	37050001	37150000	0.618315
8	37100001	37200000	0.648668
8	37150001	37250000	0.638563
8	37200001	37300000	0.581267
8	37250001	37350000	0.509389
8	37300001	37400000	0.624673
8	37350001	37450000	0.630479
8	37400001	37500000	0.578639
8	37450001	37550000	0.516552
8	37650001	37750000	0.629518
8	37700001	37800000	0.7493
8	37750001	37850000	0.73117
8	37800001	37900000	0.530862
8	37950001	38050000	0.539673
8	38000001	38100000	0.557739
8	38050001	38150000	0.469048
8	38100001	38200000	0.463803
8	38150001	38250000	0.477252
8	38200001	38300000	0.59133
8	38250001	38350000	0.589125
8	38550001	38650000	0.52731
8	38600001	38700000	0.488593
8	39050001	39150000	0.458384
8	39350001	39450000	0.456699
8	39500001	39600000	0.48795
8	39550001	39650000	0.459252
8	40150001	40250000	0.449198
8	40550001	40650000	0.449571
8	40600001	40700000	0.629679
8	40650001	40750000	0.697887
8	40700001	40800000	0.553898
8	40800001	40900000	0.449627
8	40850001	40950000	0.527474
8	40900001	41000000	0.638231
8	40950001	41050000	0.665216
8	41000001	41100000	0.593001
8	41050001	41150000	0.518776
8	41100001	41200000	0.507302
8	41150001	41250000	0.665941
8	41200001	41300000	0.762035
8	41250001	41350000	0.719979
8	41300001	41400000	0.619491
8	41350001	41450000	0.605422
8	41400001	41500000	0.692201
8	41450001	41550000	0.706866
8	41500001	41600000	0.595455
8	41550001	41650000	0.445294
8	41600001	41700000	0.505727
8	41650001	41750000	0.597601
8	41700001	41800000	0.484995
8	41750001	41850000	0.596911
8	41800001	41900000	0.651044
8	41850001	41950000	0.679123
8	41900001	42000000	0.627579
8	41950001	42050000	0.519997
8	42000001	42100000	0.587692
8	42050001	42150000	0.685669
8	42100001	42200000	0.744621
8	42150001	42250000	0.736305
8	42200001	42300000	0.788495
8	42250001	42350000	0.824995
8	42300001	42400000	0.80806
8	42350001	42450000	0.783097
8	42400001	42500000	0.82549
8	42450001	42550000	0.758482
8	42500001	42600000	0.567788
8	42550001	42650000	0.582973
8	42600001	42700000	0.621769
8	42750001	42850000	0.494948
8	42800001	42900000	0.508912
8	42950001	43050000	0.450341
8	43000001	43100000	0.481874
8	43050001	43150000	0.57508
8	43100001	43200000	0.633856
8	43150001	43250000	0.562342
8	43200001	43300000	0.537879
8	43250001	43350000	0.656553
8	43300001	43400000	0.662877
8	43350001	43450000	0.645421
8	43400001	43500000	0.676438
8	43450001	43550000	0.637176
8	43500001	43600000	0.584966
8	43550001	43650000	0.66356
8	43600001	43700000	0.641371
8	43650001	43750000	0.506096
8	43700001	43800000	0.625063
8	43750001	43850000	0.625073
8	43800001	43900000	0.544689
8	43850001	43950000	0.568289
8	43900001	44000000	0.591315
8	43950001	44050000	0.626181
8	44000001	44100000	0.674829
8	44050001	44150000	0.602846
8	44100001	44200000	0.56476
8	44150001	44250000	0.676524
8	44200001	44300000	0.745514
8	44250001	44350000	0.684515
8	44300001	44400000	0.549934
8	44350001	44450000	0.60334
8	44400001	44500000	0.607963
8	44450001	44550000	0.611628
8	44500001	44600000	0.61439
8	44550001	44650000	0.633209
8	44600001	44700000	0.650709
8	44650001	44750000	0.611539
8	44850001	44950000	0.471462
8	44900001	45000000	0.471936
8	44950001	45050000	0.557292
8	45000001	45100000	0.62544
8	45050001	45150000	0.570541
8	45100001	45200000	0.583508
8	45150001	45250000	0.486317
8	45250001	45350000	0.459346
8	45300001	45400000	0.448861
8	45350001	45450000	0.501674
8	45400001	45500000	0.490867
8	45450001	45550000	0.529599
8	45500001	45600000	0.592619
8	45550001	45650000	0.699294
8	45600001	45700000	0.716636
8	45650001	45750000	0.498912
8	45700001	45800000	0.499862
8	45750001	45850000	0.753469
8	45800001	45900000	0.726357
8	45850001	45950000	0.447778
8	45900001	46000000	0.445245
8	45950001	46050000	0.479654
8	46000001	46100000	0.567477
8	46050001	46150000	0.539885
8	46100001	46200000	0.583999
8	46150001	46250000	0.62535
8	46200001	46300000	0.683175
8	46250001	46350000	0.728448
8	46300001	46400000	0.738554
8	46350001	46450000	0.695576
8	46400001	46500000	0.653895
8	46450001	46550000	0.710571
8	46500001	46600000	0.716737
8	46550001	46650000	0.722002
8	46600001	46700000	0.658837
8	46650001	46750000	0.584648
8	46700001	46800000	0.692229
8	46750001	46850000	0.780733
8	46800001	46900000	0.789081
8	46850001	46950000	0.709504
8	46900001	47000000	0.694197
8	46950001	47050000	0.717588
8	47000001	47100000	0.664253
8	47050001	47150000	0.644984
8	47100001	47200000	0.668028
8	47150001	47250000	0.66589
8	47200001	47300000	0.721316
8	47250001	47350000	0.779155
8	47300001	47400000	0.733343
8	47350001	47450000	0.566392
8	47400001	47500000	0.528844
8	47550001	47650000	0.52867
8	47600001	47700000	0.474314
8	47650001	47750000	0.477465
8	47700001	47800000	0.664141
8	47750001	47850000	0.736546
8	47800001	47900000	0.622787
8	47850001	47950000	0.581462
8	47900001	48000000	0.531315
8	47950001	48050000	0.505265
8	48000001	48100000	0.487407
8	48050001	48150000	0.577329
8	48100001	48200000	0.592461
8	48150001	48250000	0.568811
8	48300001	48400000	0.516437
8	48350001	48450000	0.786672
8	48400001	48500000	0.798734
8	48450001	48550000	0.777734
8	48500001	48600000	0.7654
8	48550001	48650000	0.803753
8	48600001	48700000	0.772507
8	48650001	48750000	0.690574
8	48700001	48800000	0.67473
8	48750001	48850000	0.647635
8	48800001	48900000	0.6319
8	48850001	48950000	0.77361
8	48900001	49000000	0.770833
8	48950001	49050000	0.732967
8	49000001	49100000	0.648961
8	49050001	49150000	0.642651
8	49100001	49200000	0.695681
8	49150001	49250000	0.699455
8	49200001	49300000	0.727145
8	49250001	49350000	0.768159
8	49300001	49400000	0.771004
8	49350001	49450000	0.774423
8	49400001	49500000	0.755342
8	49450001	49550000	0.705565
8	49500001	49600000	0.701081
8	49550001	49650000	0.70015
8	49600001	49700000	0.511263
8	49700001	49800000	0.579625
8	49750001	49850000	0.77965
8	49800001	49900000	0.77758
8	49850001	49950000	0.773723
8	49900001	50000000	0.769156
8	49950001	50050000	0.698558
8	50000001	50100000	0.593355
8	50050001	50150000	0.560819
8	50100001	50200000	0.617309
8	50150001	50250000	0.6873
8	50200001	50300000	0.668316
8	50250001	50350000	0.59487
8	50300001	50400000	0.499015
8	50400001	50500000	0.55083
8	50450001	50550000	0.695341
8	50500001	50600000	0.719053
8	50550001	50650000	0.612423
8	50750001	50850000	0.468888
8	50800001	50900000	0.589198
8	50850001	50950000	0.650566
8	50900001	51000000	0.656006
8	50950001	51050000	0.687005
8	51000001	51100000	0.727531
8	51050001	51150000	0.710927
8	51100001	51200000	0.69501
8	51150001	51250000	0.631635
8	51200001	51300000	0.640615
8	51250001	51350000	0.690944
8	51300001	51400000	0.694297
8	51350001	51450000	0.689477
8	51400001	51500000	0.753061
8	51450001	51550000	0.777086
8	51500001	51600000	0.785322
8	51550001	51650000	0.772759
8	51600001	51700000	0.693782
8	51650001	51750000	0.614766
8	51700001	51800000	0.462402
8	51750001	51850000	0.660432
8	51800001	51900000	0.670554
8	51850001	51950000	0.520556
8	51900001	52000000	0.484439
8	51950001	52050000	0.506251
8	52000001	52100000	0.539243
8	52050001	52150000	0.556428
8	52100001	52200000	0.568525
8	52150001	52250000	0.706158
8	52200001	52300000	0.733732
8	52250001	52350000	0.754807
8	52300001	52400000	0.774215
8	52350001	52450000	0.784209
8	52400001	52500000	0.763194
8	52450001	52550000	0.751391
8	52500001	52600000	0.74434
8	52550001	52650000	0.721955
8	52600001	52700000	0.716956
8	52650001	52750000	0.718136
8	52700001	52800000	0.722365
8	52750001	52850000	0.70572
8	52800001	52900000	0.577567
8	52850001	52950000	0.529037
8	52900001	53000000	0.480875
8	52950001	53050000	0.497957
8	53000001	53100000	0.538592
8	53050001	53150000	0.53114
8	53100001	53200000	0.552584
8	53150001	53250000	0.582739
8	53200001	53300000	0.589998
8	53250001	53350000	0.493346
8	53650001	53750000	0.476555
8	53700001	53800000	0.541893
8	53750001	53850000	0.533746
8	53800001	53900000	0.549314
8	53850001	53950000	0.564176
8	54200001	54300000	0.772302
8	54250001	54350000	0.468892
8	54300001	54400000	0.488176
8	54350001	54450000	0.715437
8	54400001	54500000	0.759867
8	54450001	54550000	0.676499
8	54500001	54600000	0.618429
8	54550001	54650000	0.617336
8	54600001	54700000	0.50288
8	54650001	54750000	0.582216
8	54700001	54800000	0.814578
8	54750001	54850000	0.818936
8	54800001	54900000	0.824529
8	54850001	54950000	0.815874
8	54900001	55000000	0.778736
8	54950001	55050000	0.796168
8	55000001	55100000	0.823505
8	55050001	55150000	0.770087
8	55100001	55200000	0.617086
8	55150001	55250000	0.511324
8	55200001	55300000	0.468064
8	55250001	55350000	0.520908
8	55300001	55400000	0.675185
8	55350001	55450000	0.732606
8	55400001	55500000	0.542152
8	55450001	55550000	0.480237
8	55550001	55650000	0.480779
8	55600001	55700000	0.482749
8	55800001	55900000	0.46895
8	55850001	55950000	0.544978
8	55900001	56000000	0.585065
8	55950001	56050000	0.640654
8	56000001	56100000	0.645641
8	56050001	56150000	0.578548
8	56100001	56200000	0.615274
8	56150001	56250000	0.684132
8	56200001	56300000	0.695083
8	56250001	56350000	0.700831
8	56300001	56400000	0.792596
8	56350001	56450000	0.843453
8	56400001	56500000	0.813974
8	56450001	56550000	0.684291
8	56500001	56600000	0.567432
8	56550001	56650000	0.56199
8	56600001	56700000	0.620951
8	56650001	56750000	0.632691
8	56700001	56800000	0.626101
8	56750001	56850000	0.619923
8	56800001	56900000	0.586826
8	56850001	56950000	0.603788
8	56900001	57000000	0.634012
8	56950001	57050000	0.655206
8	57000001	57100000	0.698994
8	57050001	57150000	0.758406
8	57100001	57200000	0.766945
8	57150001	57250000	0.706369
8	57200001	57300000	0.599902
8	57250001	57350000	0.658015
8	57300001	57400000	0.76069
8	57350001	57450000	0.765071
8	57400001	57500000	0.72737
8	57450001	57550000	0.725226
8	57500001	57600000	0.70178
8	57550001	57650000	0.664991
8	57600001	57700000	0.646662
8	57650001	57750000	0.628654
8	57700001	57800000	0.624406
8	57750001	57850000	0.619566
8	57800001	57900000	0.612178
8	57850001	57950000	0.599943
8	57900001	58000000	0.565258
8	57950001	58050000	0.501433
8	58000001	58100000	0.515691
8	58050001	58150000	0.613994
8	58100001	58200000	0.651203
8	58150001	58250000	0.632901
8	58200001	58300000	0.53289
8	58250001	58350000	0.470886
8	58300001	58400000	0.485064
8	58350001	58450000	0.545961
8	58400001	58500000	0.660109
8	58450001	58550000	0.711283
8	58500001	58600000	0.679852
8	58550001	58650000	0.621901
8	58600001	58700000	0.654937
8	58650001	58750000	0.660799
8	58700001	58800000	0.676052
8	58750001	58850000	0.637124
8	58800001	58900000	0.596955
8	58850001	58950000	0.636039
8	58900001	59000000	0.624992
8	58950001	59050000	0.596167
8	59000001	59100000	0.605305
8	59050001	59150000	0.644642
8	59100001	59200000	0.622448
8	59150001	59250000	0.465472
8	59200001	59300000	0.610913
8	59250001	59350000	0.664885
8	59300001	59400000	0.656924
8	59350001	59450000	0.58123
8	59800001	59900000	0.516505
8	59850001	59950000	0.615149
8	59900001	60000000	0.625438
8	59950001	60050000	0.595884
8	60000001	60100000	0.634427
8	60050001	60150000	0.674165
8	60100001	60200000	0.656487
8	60150001	60250000	0.577848
8	60250001	60350000	0.493974
8	60300001	60400000	0.585474
8	60350001	60450000	0.545248
8	60400001	60500000	0.581579
8	60450001	60550000	0.456801
8	60800001	60900000	0.503478
8	60850001	60950000	0.51142
8	60900001	61000000	0.506454
8	60950001	61050000	0.501801
8	61000001	61100000	0.666718
8	61050001	61150000	0.674302
8	61100001	61200000	0.679433
8	61150001	61250000	0.722849
8	61200001	61300000	0.776206
8	61250001	61350000	0.666596
8	61300001	61400000	0.491765
8	61700001	61800000	0.635396
8	61750001	61850000	0.584389
8	61800001	61900000	0.4527
8	61850001	61950000	0.477305
8	62300001	62400000	0.533335
8	62350001	62450000	0.462852
8	62700001	62800000	0.532051
8	62750001	62850000	0.540421
8	62850001	62950000	0.519036
8	62900001	63000000	0.630086
8	62950001	63050000	0.591423
8	63300001	63400000	0.680866
8	63350001	63450000	0.648172
8	63400001	63500000	0.622958
8	63450001	63550000	0.628004
8	63500001	63600000	0.56906
8	63550001	63650000	0.483694
8	63850001	63950000	0.556087
8	63900001	64000000	0.620348
8	63950001	64050000	0.64922
8	64000001	64100000	0.64414
8	64050001	64150000	0.634637
8	64100001	64200000	0.625047
8	64150001	64250000	0.701136
8	64200001	64300000	0.765616
8	64250001	64350000	0.659496
8	64300001	64400000	0.718632
8	64350001	64450000	0.719734
8	64400001	64500000	0.700921
8	64450001	64550000	0.678141
8	64500001	64600000	0.454621
8	64650001	64750000	0.493102
8	64850001	64950000	0.484914
8	64900001	65000000	0.558394
8	64950001	65050000	0.589775
8	65000001	65100000	0.589369
8	65100001	65200000	0.639423
8	65150001	65250000	0.789003
8	65200001	65300000	0.844641
8	65250001	65350000	0.863416
8	65300001	65400000	0.855307
8	65350001	65450000	0.856343
8	65400001	65500000	0.867049
8	65450001	65550000	0.875067
8	65500001	65600000	0.867748
8	65550001	65650000	0.792564
8	65600001	65700000	0.777436
8	65650001	65750000	0.80578
8	65700001	65800000	0.749124
8	65750001	65850000	0.453135
8	65800001	65900000	0.695517
8	65850001	65950000	0.668239
8	66250001	66350000	0.556324
8	66300001	66400000	0.549076
8	66350001	66450000	0.593559
8	66400001	66500000	0.747106
8	66450001	66550000	0.797647
8	66500001	66600000	0.784892
8	66550001	66650000	0.813175
8	66600001	66700000	0.819156
8	66650001	66750000	0.655486
8	66800001	66900000	0.611629
8	66850001	66950000	0.754862
8	66900001	67000000	0.716445
8	66950001	67050000	0.757887
8	67000001	67100000	0.838426
8	67050001	67150000	0.828676
8	67100001	67200000	0.845048
8	67150001	67250000	0.894362
8	67200001	67300000	0.862147
8	67250001	67350000	0.859421
8	67300001	67400000	0.72791
8	67350001	67450000	0.653485
8	67400001	67500000	0.713791
8	67450001	67550000	0.583802
8	67550001	67650000	0.544445
8	67600001	67700000	0.689911
8	67650001	67750000	0.697548
8	67700001	67800000	0.67782
8	67750001	67850000	0.663126
8	67800001	67900000	0.681762
8	67850001	67950000	0.775882
8	67900001	68000000	0.77065
8	67950001	68050000	0.763334
8	68000001	68100000	0.781909
8	68050001	68150000	0.722794
8	68100001	68200000	0.666818
8	68150001	68250000	0.776624
8	68200001	68300000	0.817074
8	68250001	68350000	0.744418
8	68300001	68400000	0.497229
8	68800001	68900000	0.501585
8	68850001	68950000	0.493539
8	68950001	69050000	0.483317
8	69000001	69100000	0.446244
8	69200001	69300000	0.530849
8	69250001	69350000	0.602129
8	69300001	69400000	0.615384
8	69350001	69450000	0.619476
8	69400001	69500000	0.615877
8	69450001	69550000	0.576251
8	69600001	69700000	0.525991
8	69650001	69750000	0.572275
8	69700001	69800000	0.464359
8	69750001	69850000	0.46337
8	69800001	69900000	0.469243
8	70050001	70150000	0.518588
8	70100001	70200000	0.507954
8	70300001	70400000	0.46882
8	70350001	70450000	0.497243
8	70450001	70550000	0.493797
8	70500001	70600000	0.490087
8	70600001	70700000	0.512443
8	70650001	70750000	0.575496
8	70700001	70800000	0.543777
8	70850001	70950000	0.519432
8	70900001	71000000	0.472874
8	70950001	71050000	0.559238
8	71000001	71100000	0.585184
8	71050001	71150000	0.480167
8	71100001	71200000	0.463486
8	71150001	71250000	0.475581
8	71200001	71300000	0.503698
8	71250001	71350000	0.503034
8	71300001	71400000	0.452979
8	71350001	71450000	0.544067
8	71400001	71500000	0.459942
8	71800001	71900000	0.509957
8	71850001	71950000	0.550383
8	71900001	72000000	0.509859
8	71950001	72050000	0.555885
8	72000001	72100000	0.517299
8	72100001	72200000	0.448723
8	72150001	72250000	0.447946
8	72750001	72850000	0.464844
8	72850001	72950000	0.456684
8	72900001	73000000	0.501169
8	72950001	73050000	0.474672
8	73000001	73100000	0.456776
8	73750001	73850000	0.452075
8	75300001	75400000	0.447489
8	75550001	75650000	0.471415
8	75600001	75700000	0.534516
8	75650001	75750000	0.530306
8	75700001	75800000	0.448361
8	75750001	75850000	0.470877
8	75800001	75900000	0.445376
8	76250001	76350000	0.466753
8	76300001	76400000	0.483123
8	76550001	76650000	0.483811
8	76600001	76700000	0.507143
8	76650001	76750000	0.451428
8	77400001	77500000	0.458218
8	77450001	77550000	0.461503
8	77500001	77600000	0.539375
8	77550001	77650000	0.530879
8	78200001	78300000	0.498956
8	78350001	78450000	0.48754
8	78400001	78500000	0.640808
8	78450001	78550000	0.592057
8	78500001	78600000	0.486247
8	78550001	78650000	0.479992
8	78900001	79000000	0.480193
8	78950001	79050000	0.513148
8	79000001	79100000	0.541843
8	79050001	79150000	0.592952
8	79100001	79200000	0.623958
8	79150001	79250000	0.580036
8	79200001	79300000	0.524623
8	79250001	79350000	0.51932
8	79300001	79400000	0.465547
8	79350001	79450000	0.491457
8	79450001	79550000	0.468758
8	79500001	79600000	0.57804
8	79550001	79650000	0.531442
8	79600001	79700000	0.561174
8	79650001	79750000	0.559095
8	79800001	79900000	0.50031
8	79850001	79950000	0.463977
8	80900001	81000000	0.46805
8	81550001	81650000	0.457248
8	81600001	81700000	0.522629
8	81650001	81750000	0.456074
8	81950001	82050000	0.470976
8	82000001	82100000	0.450633
8	82100001	82200000	0.462185
8	82150001	82250000	0.447047
8	83250001	83350000	0.455128
8	83650001	83750000	0.520367
8	83700001	83800000	0.576045
8	83750001	83850000	0.487787
8	84150001	84250000	0.47625
8	84200001	84300000	0.527705
8	84250001	84350000	0.518512
8	84300001	84400000	0.571216
8	84350001	84450000	0.525709
8	84400001	84500000	0.478181
8	84800001	84900000	0.454806
8	84850001	84950000	0.470445
8	85050001	85150000	0.502187
[truncated: 266 more rows]

## Sheet: Table S2
Table S2. Potential candidate regions detected by θπ ratio (Xiangyang Black VS Western pig breeds)
Chr	Start	End	θπ ratio
1	1450001	1550000	1.13757
1	1700001	1800000	1.19233
1	22100001	22200000	1.09574
1	25400001	25500000	1.10481
1	25450001	25550000	1.24411
1	28450001	28550000	1.1797
1	28500001	28600000	1.1009
1	29350001	29450000	1.15898
1	38150001	38250000	1.178
1	38200001	38300000	1.33321
1	38250001	38350000	1.12611
1	38900001	39000000	1.10199
1	38950001	39050000	1.42011
1	41600001	41700000	1.19474
1	41650001	41750000	1.20604
1	42500001	42600000	1.29074
1	44400001	44500000	1.10898
1	44450001	44550000	1.40774
1	44500001	44600000	1.15988
1	44600001	44700000	1.21759
1	44650001	44750000	1.17322
1	44700001	44800000	1.14977
1	44750001	44850000	1.14457
1	44850001	44950000	1.16596
1	44900001	45000000	1.4269
1	44950001	45050000	1.33283
1	45000001	45100000	1.31625
1	45050001	45150000	1.30592
1	45100001	45200000	1.16612
1	45150001	45250000	1.24237
1	45200001	45300000	1.34182
1	45250001	45350000	1.25943
1	45300001	45400000	1.15124
1	46150001	46250000	1.28724
1	46200001	46300000	1.15254
1	46550001	46650000	1.91176
1	46600001	46700000	1.67615
1	46650001	46750000	1.51863
1	46700001	46800000	1.21186
1	46750001	46850000	1.2433
1	46800001	46900000	1.32562
1	47250001	47350000	1.10429
1	47300001	47400000	1.55253
1	47350001	47450000	2.00043
1	47400001	47500000	1.71531
1	47450001	47550000	2.32217
1	47500001	47600000	2.51859
1	47550001	47650000	2.66724
1	47600001	47700000	3.18003
1	47650001	47750000	1.95335
1	47700001	47800000	1.38401
1	47900001	48000000	1.68056
1	47950001	48050000	2.51953
1	48000001	48100000	1.94663
1	48050001	48150000	1.99765
1	48100001	48200000	1.65737
1	48150001	48250000	1.18377
1	48400001	48500000	1.39532
1	50100001	50200000	1.13921
1	51800001	51900000	1.16187
1	52100001	52200000	1.20446
1	52300001	52400000	1.23634
1	52350001	52450000	1.13176
1	66950001	67050000	1.15076
1	73850001	73950000	1.21707
1	74500001	74600000	1.20572
1	76600001	76700000	1.18925
1	76650001	76750000	1.12945
1	89050001	89150000	1.18649
1	94900001	95000000	1.2637
1	94950001	95050000	1.20384
1	95450001	95550000	1.19868
1	95600001	95700000	1.19422
1	116750001	116850000	1.13861
1	116800001	116900000	1.20757
1	125950001	126050000	1.41519
1	126000001	126100000	1.15253
1	139700001	139800000	1.12142
1	155100001	155200000	1.18394
1	165650001	165750000	1.16002
1	167150001	167250000	1.1234
1	175150001	175250000	1.20423
1	175200001	175300000	1.28675
1	184500001	184600000	1.1061
1	184550001	184650000	1.51939
1	184600001	184700000	2.05541
1	206200001	206300000	1.55522
1	206250001	206350000	1.99858
1	206300001	206400000	1.23858
1	225150001	225250000	1.21901
1	225200001	225300000	2.17265
1	225250001	225350000	1.18508
1	230850001	230950000	1.16929
1	242050001	242150000	1.10314
1	264500001	264600000	1.49548
1	264550001	264650000	1.49988
1	266150001	266250000	1.17394
1	266200001	266300000	1.10048
1	266850001	266950000	1.18824
1	266900001	267000000	1.45308
2	1250001	1350000	1.28156
2	1300001	1400000	1.19282
2	11550001	11650000	1.10942
2	11600001	11700000	1.11357
2	12800001	12900000	1.12678
2	12900001	13000000	1.1039
2	15650001	15750000	1.16303
2	19950001	20050000	1.18284
2	23450001	23550000	1.1246
2	23500001	23600000	1.34675
2	23550001	23650000	1.10415
2	30800001	30900000	1.15141
2	34550001	34650000	1.14598
2	34600001	34700000	1.1197
2	37150001	37250000	1.34457
2	37200001	37300000	1.35968
2	41900001	42000000	1.30167
2	41950001	42050000	1.10694
2	43450001	43550000	1.22751
2	43500001	43600000	1.20834
2	44350001	44450000	1.19102
2	44400001	44500000	1.2679
2	51750001	51850000	1.24771
2	51800001	51900000	1.48984
2	51900001	52000000	1.31597
2	51950001	52050000	1.86267
2	52250001	52350000	1.19609
2	53850001	53950000	1.95506
2	53900001	54000000	1.33803
2	53950001	54050000	1.19887
2	54100001	54200000	1.2981
2	54550001	54650000	1.57192
2	55050001	55150000	1.28366
2	55100001	55200000	1.1741
2	57650001	57750000	1.13713
2	58100001	58200000	1.52778
2	58150001	58250000	1.60645
2	58200001	58300000	1.26625
2	58400001	58500000	1.2765
2	58450001	58550000	1.22986
2	58500001	58600000	1.20437
2	58550001	58650000	1.09582
2	59100001	59200000	1.21575
2	59150001	59250000	1.24372
2	59200001	59300000	1.23023
2	59250001	59350000	1.21626
2	59300001	59400000	1.19739
2	59350001	59450000	1.32684
2	62400001	62500000	1.24025
2	62450001	62550000	1.30138
2	70150001	70250000	1.19165
2	70200001	70300000	1.13141
2	71800001	71900000	1.09984
2	92100001	92200000	1.43786
2	92450001	92550000	1.20481
2	92500001	92600000	1.52882
2	92550001	92650000	1.10986
2	103850001	103950000	1.10506
2	103900001	104000000	1.19963
2	104450001	104550000	1.09811
2	104800001	104900000	1.11454
2	104850001	104950000	1.24863
2	109100001	109200000	1.10822
2	113650001	113750000	1.11248
2	113700001	113800000	1.2093
2	113950001	114050000	1.14687
2	114000001	114100000	1.13402
2	114100001	114200000	1.14557
2	114150001	114250000	1.39381
2	114200001	114300000	1.17763
2	114300001	114400000	1.14495
2	114350001	114450000	1.12067
2	115000001	115100000	1.10334
2	115950001	116050000	1.15982
2	116050001	116150000	1.11539
2	116100001	116200000	1.16045
2	119350001	119450000	1.11253
2	129800001	129900000	1.10025
2	135250001	135350000	1.70108
2	135300001	135400000	1.5747
2	135350001	135450000	1.10291
2	139000001	139100000	1.10909
2	148950001	149050000	1.21224
3	13400001	13500000	1.29008
3	13850001	13950000	1.12986
3	13950001	14050000	1.70714
3	14000001	14100000	1.45579
3	14050001	14150000	1.23094
3	14100001	14200000	1.16156
3	14150001	14250000	1.40588
3	14200001	14300000	1.33073
3	14450001	14550000	1.39965
3	14700001	14800000	1.10104
3	14750001	14850000	1.3869
3	16950001	17050000	1.17405
3	18550001	18650000	1.15505
3	18600001	18700000	1.19305
3	18750001	18850000	1.30256
3	18800001	18900000	1.18476
3	19550001	19650000	1.26282
3	19750001	19850000	1.15405
3	19850001	19950000	1.09677
3	19900001	20000000	1.31201
3	20050001	20150000	1.19039
3	20100001	20200000	1.13427
3	20150001	20250000	1.10402
3	20200001	20300000	1.11583
3	20250001	20350000	1.18718
3	27650001	27750000	1.17918
3	27700001	27800000	1.10745
3	28950001	29050000	1.15428
3	29000001	29100000	1.3005
3	29050001	29150000	1.30214
3	29100001	29200000	1.14948
3	29450001	29550000	1.11066
3	29500001	29600000	1.14376
3	38250001	38350000	1.60744
3	38300001	38400000	1.51968
3	38350001	38450000	1.55891
3	38400001	38500000	1.60335
3	38450001	38550000	1.28637
3	38500001	38600000	1.16918
3	38550001	38650000	1.14365
3	58600001	58700000	1.35372
3	75950001	76050000	1.10018
3	106800001	106900000	1.13476
3	106850001	106950000	1.11772
3	109200001	109300000	1.24685
3	129400001	129500000	1.1866
3	129450001	129550000	1.24721
3	129700001	129800000	1.10221
3	129850001	129950000	1.10008
3	130000001	130100000	1.09833
3	130050001	130150000	1.09687
3	130250001	130350000	1.13226
3	130300001	130400000	1.26408
3	130350001	130450000	1.3407
3	130400001	130500000	1.44057
3	130450001	130550000	1.35327
3	130700001	130800000	1.11934
4	12150001	12250000	1.1315
4	12550001	12650000	1.28251
4	12600001	12700000	1.33861
4	12650001	12750000	1.1182
4	12700001	12800000	1.20068
4	12750001	12850000	1.17867
4	13150001	13250000	1.11189
4	13400001	13500000	1.15478
4	13450001	13550000	1.10435
4	13850001	13950000	1.20238
4	13900001	14000000	1.11684
4	21350001	21450000	1.1175
4	28450001	28550000	1.19259
4	28500001	28600000	1.2188
4	29150001	29250000	1.15454
4	44250001	44350000	1.0958
4	44300001	44400000	1.4003
4	44350001	44450000	1.18203
4	44400001	44500000	1.27597
4	44450001	44550000	1.21767
4	44850001	44950000	1.14239
4	46500001	46600000	1.37171
4	46550001	46650000	1.62821
4	46600001	46700000	1.58862
4	46650001	46750000	1.24695
4	50550001	50650000	1.18946
4	50750001	50850000	1.41836
4	50800001	50900000	1.28109
4	51000001	51100000	1.98447
4	51050001	51150000	1.29334
4	52200001	52300000	2.55721
4	52250001	52350000	1.90084
4	52550001	52650000	1.13678
4	52900001	53000000	1.12392
4	52950001	53050000	1.19227
4	54200001	54300000	1.27465
4	54250001	54350000	1.38805
4	54300001	54400000	1.27642
4	54650001	54750000	1.1064
4	54700001	54800000	1.67146
4	54750001	54850000	1.27291
4	55100001	55200000	1.12408
4	58300001	58400000	1.13545
4	58350001	58450000	1.10639
4	60000001	60100000	1.10106
4	89950001	90050000	1.20432
4	92350001	92450000	1.18727
4	97750001	97850000	1.22553
4	97800001	97900000	1.1021
4	98700001	98800000	1.12903
4	106100001	106200000	1.12847
4	110700001	110800000	1.10286
4	113350001	113450000	1.44498
4	113400001	113500000	1.61662
4	113450001	113550000	1.6287
4	113500001	113600000	1.35119
4	114300001	114400000	1.15267
4	114350001	114450000	1.16609
4	114400001	114500000	1.40712
4	114450001	114550000	1.31548
4	115350001	115450000	1.10332
4	115550001	115650000	1.13481
4	119900001	120000000	1.33743
4	119950001	120050000	1.1163
4	120200001	120300000	1.12579
4	129700001	129800000	1.11542
5	7750001	7850000	1.09835
5	13250001	13350000	1.31792
5	13450001	13550000	1.22128
5	13500001	13600000	1.10272
5	13550001	13650000	1.13378
5	13600001	13700000	1.2423
5	14650001	14750000	1.13438
5	15050001	15150000	1.18477
5	15100001	15200000	1.17723
5	15700001	15800000	1.14237
5	16000001	16100000	1.15095
5	16050001	16150000	1.09992
5	16100001	16200000	1.12749
5	16150001	16250000	1.30097
5	16200001	16300000	1.20898
5	16300001	16400000	1.37606
5	16350001	16450000	1.32523
5	16750001	16850000	1.1751
5	17100001	17200000	1.09786
5	18100001	18200000	1.16253
5	18350001	18450000	1.13744
5	18400001	18500000	1.35393
5	18450001	18550000	1.15308
5	18600001	18700000	1.2167
5	18650001	18750000	1.12678
5	23300001	23400000	1.11533
5	23700001	23800000	1.33263
5	23750001	23850000	1.28616
5	23900001	24000000	1.39973
5	23950001	24050000	1.44403
5	24550001	24650000	1.2068
5	24700001	24800000	1.15895
5	25050001	25150000	1.1615
5	25100001	25200000	1.10107
5	25150001	25250000	1.22438
5	25200001	25300000	1.22544
5	25450001	25550000	1.11378
5	25500001	25600000	1.68162
5	25550001	25650000	1.35465
5	25750001	25850000	1.10605
5	25800001	25900000	1.63156
5	25850001	25950000	1.32505
5	25900001	26000000	1.11194
5	25950001	26050000	1.09923
5	26350001	26450000	1.11163
5	26650001	26750000	1.10525
5	26700001	26800000	1.16729
5	26750001	26850000	1.16329
5	26950001	27050000	1.62429
5	27000001	27100000	1.83827
5	27050001	27150000	1.3459
5	27100001	27200000	1.1908
5	27250001	27350000	1.20214
5	27300001	27400000	1.10208
5	29100001	29200000	1.12305
5	38600001	38700000	1.43308
5	38650001	38750000	1.53224
5	38700001	38800000	1.48822
5	38750001	38850000	1.26313
5	41900001	42000000	1.20654
5	42650001	42750000	1.16672
5	52950001	53050000	1.67826
5	53000001	53100000	1.18549
5	60850001	60950000	1.14049
5	61100001	61200000	1.15537
5	61150001	61250000	1.32186
5	61200001	61300000	1.42538
5	61250001	61350000	1.39756
5	61300001	61400000	1.25212
5	61350001	61450000	1.10727
5	68200001	68300000	1.19982
5	68350001	68450000	1.31591
5	69050001	69150000	1.19552
5	69250001	69350000	1.22049
5	69300001	69400000	1.12397
5	69800001	69900000	1.13342
5	70550001	70650000	1.10036
5	72250001	72350000	1.27098
5	72800001	72900000	1.10356
5	72950001	73050000	1.19143
5	73850001	73950000	1.10321
5	73900001	74000000	1.10271
5	90000001	90100000	1.21451
5	90750001	90850000	1.1028
5	91050001	91150000	1.11389
5	91100001	91200000	1.2892
5	91150001	91250000	1.4205
5	91200001	91300000	1.47492
5	91250001	91350000	1.31732
5	91300001	91400000	1.29378
5	91350001	91450000	1.37588
5	91400001	91500000	1.46546
5	91450001	91550000	1.75308
5	91500001	91600000	1.56034
5	91550001	91650000	1.62148
5	91600001	91700000	1.75555
5	91650001	91750000	1.52009
5	91700001	91800000	1.13282
5	92300001	92400000	1.10057
5	92350001	92450000	1.12253
5	92600001	92700000	1.22894
5	92650001	92750000	1.2311
5	92700001	92800000	1.31431
5	92750001	92850000	1.43212
5	92800001	92900000	1.55613
5	92850001	92950000	1.51847
5	92900001	93000000	1.37244
5	92950001	93050000	1.5113
5	93000001	93100000	1.35239
5	93400001	93500000	1.21548
5	99550001	99650000	1.11099
5	100300001	100400000	1.09877
5	100400001	100500000	1.10292
5	100450001	100550000	1.10562
5	101900001	102000000	1.11464
5	102050001	102150000	1.12124
5	102100001	102200000	1.21915
5	102150001	102250000	1.24357
5	102200001	102300000	1.22231
5	102250001	102350000	1.11331
5	103350001	103450000	1.11072
5	103400001	103500000	1.24081
5	103450001	103550000	1.20525
5	103900001	104000000	1.18335
5	103950001	104050000	1.40462
5	104000001	104100000	1.42359
6	5200001	5300000	1.13553
6	5500001	5600000	1.22531
6	5550001	5650000	1.12339
6	6250001	6350000	1.10922
6	6300001	6400000	1.09722
6	12750001	12850000	1.1018
6	15350001	15450000	1.23226
6	15400001	15500000	1.14682
6	16450001	16550000	1.11026
6	17650001	17750000	1.16107
6	19250001	19350000	1.09878
6	19300001	19400000	1.37803
6	19350001	19450000	1.12021
6	23650001	23750000	1.35271
6	23700001	23800000	1.10141
6	24750001	24850000	1.21934
6	27900001	28000000	1.23156
6	43950001	44050000	1.26261
6	44700001	44800000	1.11739
6	47950001	48050000	1.09943
6	48100001	48200000	1.12486
6	48150001	48250000	1.17673
6	49150001	49250000	1.68001
6	49200001	49300000	1.12239
6	53200001	53300000	1.26663
6	54250001	54350000	1.30601
6	54300001	54400000	1.57565
6	54350001	54450000	2.33871
6	54400001	54500000	2.33972
6	54450001	54550000	2.76302
6	54500001	54600000	3.49866
6	54550001	54650000	3.364
6	54600001	54700000	3.31331
6	54650001	54750000	1.70483
6	59300001	59400000	1.23284
6	59350001	59450000	1.48452
6	59400001	59500000	1.57502
6	59450001	59550000	1.32599
6	59800001	59900000	1.27059
6	59850001	59950000	1.22989
6	60000001	60100000	1.20961
6	60050001	60150000	1.86221
6	60100001	60200000	2.20808
6	60150001	60250000	2.27394
6	60200001	60300000	1.9389
6	60250001	60350000	1.56029
6	60300001	60400000	1.98967
6	60350001	60450000	2.70206
6	60400001	60500000	1.77119
6	60450001	60550000	1.46739
6	60500001	60600000	1.58505
6	60550001	60650000	1.76911
6	60600001	60700000	1.61879
6	60650001	60750000	1.54359
6	60700001	60800000	1.8797
6	60750001	60850000	2.7269
6	60800001	60900000	3.16206
6	60850001	60950000	1.82478
6	60900001	61000000	1.38472
6	60950001	61050000	2.15071
6	61000001	61100000	3.03057
6	61050001	61150000	1.90203
6	61100001	61200000	1.61946
6	61150001	61250000	1.44922
6	61200001	61300000	1.69558
6	61250001	61350000	1.79515
6	61300001	61400000	2.1285
6	61350001	61450000	2.74243
6	61400001	61500000	2.95777
6	61450001	61550000	2.35525
6	61500001	61600000	1.35165
6	61550001	61650000	1.27082
6	61600001	61700000	1.26356
6	61650001	61750000	1.45644
6	61700001	61800000	1.91655
6	61750001	61850000	1.6309
6	61800001	61900000	1.4679
6	61850001	61950000	1.13378
6	62200001	62300000	1.11967
6	62550001	62650000	1.12636
6	63000001	63100000	1.1733
6	63050001	63150000	1.34001
6	63100001	63200000	1.10266
6	63300001	63400000	1.68323
6	63350001	63450000	1.41864
6	63650001	63750000	1.21212
6	64200001	64300000	1.13617
6	64750001	64850000	1.14894
6	65500001	65600000	1.16428
6	65550001	65650000	1.17412
6	65700001	65800000	1.14817
6	68800001	68900000	1.1032
6	69000001	69100000	1.34144
6	69050001	69150000	1.50631
6	69100001	69200000	1.56459
6	69150001	69250000	1.66433
6	69200001	69300000	1.91394
6	69250001	69350000	1.26986
6	71550001	71650000	1.16631
6	73500001	73600000	1.30573
6	73550001	73650000	1.19981
6	74750001	74850000	1.15547
6	74800001	74900000	1.26944
6	76150001	76250000	1.15536
6	76650001	76750000	1.1996
6	77100001	77200000	1.11226
6	77150001	77250000	1.20875
6	77400001	77500000	1.16382
6	77450001	77550000	1.12786
6	77500001	77600000	1.09635
6	77700001	77800000	1.28531
6	77750001	77850000	1.3104
6	77800001	77900000	1.54212
6	77850001	77950000	1.30839
6	78000001	78100000	1.10586
6	78150001	78250000	1.46658
6	78700001	78800000	1.1617
6	78750001	78850000	1.43694
6	78800001	78900000	1.38814
6	78850001	78950000	1.1771
6	78900001	79000000	1.14514
6	78950001	79050000	1.22034
6	79000001	79100000	1.37051
6	79050001	79150000	1.32039
6	79100001	79200000	1.16241
6	79200001	79300000	1.1315
6	79250001	79350000	1.21584
6	79300001	79400000	1.37653
6	79350001	79450000	1.11451
6	79600001	79700000	1.10698
6	79700001	79800000	1.31568
6	80000001	80100000	1.28279
6	80050001	80150000	1.27877
6	80100001	80200000	1.16752
6	80150001	80250000	1.37185
6	80200001	80300000	1.14693
6	80500001	80600000	1.29852
6	80550001	80650000	1.26938
6	80600001	80700000	1.14367
6	80650001	80750000	1.21239
6	80750001	80850000	1.10436
6	80950001	81050000	1.47512
6	81000001	81100000	1.65674
6	81200001	81300000	1.19803
6	81400001	81500000	1.61539
6	81450001	81550000	1.16295
6	81550001	81650000	1.19855
6	81600001	81700000	1.18789
6	81650001	81750000	1.10014
6	81850001	81950000	1.24019
6	81900001	82000000	1.36862
6	82000001	82100000	1.09939
6	82150001	82250000	1.2609
6	82200001	82300000	1.49981
6	82250001	82350000	1.69206
6	84400001	84500000	1.18229
6	84450001	84550000	1.55761
6	85050001	85150000	1.36847
6	85100001	85200000	1.33225
6	86700001	86800000	1.19031
6	86750001	86850000	1.18624
6	87200001	87300000	1.18209
6	87800001	87900000	1.16331
6	87850001	87950000	1.1623
6	88200001	88300000	1.1148
6	88450001	88550000	1.17593
6	88500001	88600000	1.39446
6	88600001	88700000	1.15517
6	88650001	88750000	1.15835
6	88750001	88850000	1.45086
6	88800001	88900000	1.65058
6	88850001	88950000	1.30324
6	89400001	89500000	1.09556
6	89450001	89550000	1.25024
6	90450001	90550000	1.11872
6	90500001	90600000	1.29363
6	90750001	90850000	1.16745
6	90800001	90900000	1.65579
6	90850001	90950000	1.27605
6	94750001	94850000	1.22238
6	95350001	95450000	1.09883
6	96150001	96250000	1.75783
6	96200001	96300000	1.73558
6	96250001	96350000	1.78165
6	96300001	96400000	1.6133
6	96350001	96450000	1.57412
6	96400001	96500000	1.11381
6	96750001	96850000	1.31394
6	96800001	96900000	1.28135
6	96850001	96950000	1.55504
6	96900001	97000000	1.48704
6	96950001	97050000	1.13465
6	97000001	97100000	1.2891
6	97200001	97300000	1.1604
6	97850001	97950000	1.17189
6	97900001	98000000	1.31137
6	97950001	98050000	1.23132
6	98000001	98100000	1.27688
6	99000001	99100000	1.28135
6	99300001	99400000	1.11076
6	99350001	99450000	1.27776
6	99800001	99900000	1.14158
6	101450001	101550000	1.11309
6	102450001	102550000	1.19103
6	102500001	102600000	1.1031
6	104900001	105000000	1.28724
6	104950001	105050000	1.33269
6	105000001	105100000	1.31519
6	105050001	105150000	1.225
6	105100001	105200000	1.68909
6	105150001	105250000	1.86942
6	105200001	105300000	1.62622
6	105250001	105350000	1.42668
6	121400001	121500000	1.26258
6	121450001	121550000	1.29607
6	121750001	121850000	1.20889
6	122000001	122100000	1.5957
6	122050001	122150000	1.52711
6	122100001	122200000	1.09757
6	122800001	122900000	1.15446
6	122850001	122950000	1.17922
6	124600001	124700000	1.11634
6	125800001	125900000	1.0998
6	125850001	125950000	1.15326
6	126800001	126900000	1.19367
6	127100001	127200000	1.15301
6	127150001	127250000	1.30085
6	127200001	127300000	1.40485
6	127250001	127350000	1.72108
6	127300001	127400000	1.62046
6	127350001	127450000	1.24719
6	127950001	128050000	1.15818
6	128000001	128100000	1.75191
6	128050001	128150000	1.54596
6	128650001	128750000	1.14107
6	128900001	129000000	1.17231
6	130100001	130200000	1.13165
6	130400001	130500000	1.5044
6	130450001	130550000	2.02055
6	130500001	130600000	1.95469
6	130550001	130650000	1.64734
6	130600001	130700000	1.32637
6	130650001	130750000	1.32433
6	130700001	130800000	1.44623
6	130750001	130850000	1.28488
6	130800001	130900000	1.17993
6	132350001	132450000	1.49304
6	132400001	132500000	1.29511
6	132450001	132550000	1.18116
6	132500001	132600000	1.34471
6	132550001	132650000	1.59145
6	132600001	132700000	1.46328
6	132650001	132750000	1.26034
6	134050001	134150000	1.11373
6	139600001	139700000	1.16778
6	139650001	139750000	1.10391
6	141950001	142050000	1.22137
6	149500001	149600000	1.17172
6	149550001	149650000	1.14875
6	149600001	149700000	1.12468
6	158350001	158450000	1.28471
6	158400001	158500000	1.10312
6	158750001	158850000	1.0964
6	158800001	158900000	1.32081
6	168800001	168900000	1.15437
7	13550001	13650000	1.40071
7	13600001	13700000	1.23044
7	15000001	15100000	1.51935
7	15050001	15150000	1.32968
7	15100001	15200000	1.18627
7	15150001	15250000	1.10033
7	15350001	15450000	1.15795
7	15400001	15500000	1.1499
7	15550001	15650000	1.11164
7	15600001	15700000	1.11777
7	15650001	15750000	1.21408
7	15700001	15800000	1.32853
7	15750001	15850000	1.17096
7	15900001	16000000	1.34801
7	15950001	16050000	1.20031
7	16000001	16100000	1.13668
7	16050001	16150000	1.14069
7	16350001	16450000	1.16101
7	16500001	16600000	1.25052
7	16550001	16650000	1.24208
7	16600001	16700000	1.09866
7	16650001	16750000	1.32459
7	16700001	16800000	1.54384
7	16750001	16850000	1.38314
7	16800001	16900000	1.20618
7	17200001	17300000	1.14139
7	17250001	17350000	1.31808
7	19500001	19600000	1.11208
7	22100001	22200000	1.21879
7	22300001	22400000	1.24753
7	24450001	24550000	1.17525
7	25550001	25650000	1.11815
7	28650001	28750000	1.32251
7	28700001	28800000	1.3634
7	28750001	28850000	1.26085
7	28900001	29000000	1.10892
7	31000001	31100000	1.17423
7	31050001	31150000	1.35127
7	32050001	32150000	1.31614
7	32100001	32200000	1.35322
7	32150001	32250000	1.33529
7	32200001	32300000	1.31865
7	32250001	32350000	1.17696
7	32350001	32450000	1.14148
7	45450001	45550000	1.10873
7	47500001	47600000	1.11943
7	47750001	47850000	1.10521
7	47900001	48000000	1.13682
7	47950001	48050000	1.11486
7	48000001	48100000	1.16177
7	48050001	48150000	1.36888
7	48100001	48200000	1.25236
7	48150001	48250000	1.16648
7	48200001	48300000	1.13004
7	48600001	48700000	1.12339
7	48650001	48750000	1.17463
7	49900001	50000000	1.14312
7	50200001	50300000	1.13469
7	50250001	50350000	1.18115
7	51150001	51250000	1.13928
7	51200001	51300000	1.13044
7	51400001	51500000	1.10372
7	51450001	51550000	1.24221
7	51600001	51700000	1.12839
7	52700001	52800000	1.39518
7	52750001	52850000	1.32805
7	52800001	52900000	1.15385
7	52850001	52950000	1.5141
7	52900001	53000000	1.3221
7	52950001	53050000	1.11164
7	53000001	53100000	1.12509
7	58700001	58800000	1.11389
7	68650001	68750000	1.35041
7	68850001	68950000	1.30481
7	68900001	69000000	1.30204
7	69100001	69200000	1.24997
7	69500001	69600000	1.2366
7	69900001	70000000	1.19882
7	70050001	70150000	1.18923
7	70100001	70200000	1.15283
7	71300001	71400000	1.15159
7	71900001	72000000	1.14842
7	72300001	72400000	1.35348
7	72350001	72450000	1.79809
7	72400001	72500000	1.68705
7	72750001	72850000	1.25261
7	72800001	72900000	1.2213
7	72850001	72950000	1.26931
7	73800001	73900000	1.29406
7	73850001	73950000	1.20176
7	73900001	74000000	1.40326
7	73950001	74050000	1.1302
7	74500001	74600000	1.11683
7	74550001	74650000	1.1292
7	83350001	83450000	1.11727
7	84150001	84250000	1.15573
7	84200001	84300000	1.15892
7	84700001	84800000	1.1248
7	85350001	85450000	1.12464
7	85600001	85700000	1.12166
7	85650001	85750000	1.24391
7	85700001	85800000	1.20798
7	86250001	86350000	1.13689
7	86850001	86950000	1.1038
7	86900001	87000000	1.26924
7	86950001	87050000	1.25559
7	87200001	87300000	1.12838
7	87250001	87350000	1.11303
7	87450001	87550000	1.19309
7	87500001	87600000	1.19934
7	87550001	87650000	1.11196
7	87600001	87700000	1.1258
7	87750001	87850000	1.23427
7	88050001	88150000	1.52976
7	88100001	88200000	1.5383
7	88150001	88250000	1.11591
7	89900001	90000000	1.13295
7	90100001	90200000	1.11255
7	91150001	91250000	1.11041
7	91250001	91350000	1.10943
7	92400001	92500000	1.10391
7	93250001	93350000	1.14634
7	93300001	93400000	1.11682
7	93650001	93750000	1.1855
7	93800001	93900000	1.62774
7	93850001	93950000	2.15742
7	93900001	94000000	2.0913
7	93950001	94050000	2.91963
7	94000001	94100000	1.86138
7	94050001	94150000	1.38336
7	94100001	94200000	1.42118
7	94150001	94250000	1.41136
7	95100001	95200000	1.11773
7	97150001	97250000	1.2792
7	97200001	97300000	1.27188
7	97250001	97350000	1.15085
7	105150001	105250000	1.09727
7	110600001	110700000	1.14197
7	112250001	112350000	1.30623
7	112300001	112400000	1.37988
7	113200001	113300000	1.15241
7	113250001	113350000	1.17071
7	113950001	114050000	1.12242
7	114000001	114100000	1.25826
7	114050001	114150000	1.50884
7	114100001	114200000	1.10622
7	114550001	114650000	1.4692
7	114600001	114700000	2.99472
7	114650001	114750000	2.38011
7	114700001	114800000	1.46938
7	114750001	114850000	1.33486
7	114800001	114900000	1.10393
8	8950001	9050000	1.20818
8	9000001	9100000	1.34611
8	9050001	9150000	1.32417
8	20300001	20400000	1.1178
8	20450001	20550000	1.23204
8	20500001	20600000	1.13452
8	23100001	23200000	1.12653
8	23900001	24000000	1.30984
8	23950001	24050000	1.41057
8	24050001	24150000	1.13038
8	24100001	24200000	1.26581
8	25300001	25400000	1.19016
8	25500001	25600000	1.26641
8	25550001	25650000	1.35035
8	25750001	25850000	1.20327
8	27650001	27750000	1.13786
8	27700001	27800000	1.27199
8	27750001	27850000	1.24864
8	28950001	29050000	1.14918
8	30000001	30100000	1.15787
8	30450001	30550000	1.15414
8	30500001	30600000	1.38159
8	30550001	30650000	1.50921
8	30950001	31050000	1.26981
8	31000001	31100000	1.25178
8	31800001	31900000	1.1865
8	33200001	33300000	1.18189
8	34150001	34250000	1.2682
8	39000001	39100000	1.2322
8	39050001	39150000	1.29087
8	45050001	45150000	1.13261
8	45100001	45200000	1.15643
8	48250001	48350000	1.09815
8	48300001	48400000	1.10643
8	51900001	52000000	1.10219
8	53700001	53800000	1.3504
8	53750001	53850000	1.54599
8	53800001	53900000	1.18242
8	55100001	55200000	1.98828
8	55150001	55250000	2.96518
8	55200001	55300000	3.48028
8	55250001	55350000	3.13717
8	55300001	55400000	1.29936
8	64550001	64650000	1.3928
8	64900001	65000000	1.70322
8	64950001	65050000	2.28965
8	65000001	65100000	1.13775
8	65400001	65500000	1.29855
8	65450001	65550000	1.23468
8	66550001	66650000	1.19611
8	66600001	66700000	1.60493
8	66650001	66750000	3.13142
8	66700001	66800000	3.45413
8	66750001	66850000	1.58416
8	66850001	66950000	1.18371
8	66900001	67000000	1.24153
8	66950001	67050000	1.3422
8	67000001	67100000	2.70642
8	67050001	67150000	2.78629
8	67100001	67200000	1.83865
8	67200001	67300000	1.52498
8	67250001	67350000	1.5455
8	67300001	67400000	2.24845
8	67350001	67450000	1.23373
8	67450001	67550000	1.35323
8	67500001	67600000	1.57563
8	67550001	67650000	1.24689
8	67600001	67700000	1.18549
8	67850001	67950000	1.3407
8	67900001	68000000	1.96743
8	67950001	68050000	1.18716
8	68000001	68100000	1.37666
8	68200001	68300000	5.03294
8	68250001	68350000	2.33864
8	68450001	68550000	2.32538
8	68500001	68600000	1.31668
8	69150001	69250000	1.13992
8	69200001	69300000	1.72997
8	69250001	69350000	3.32266
8	69300001	69400000	4.63781
8	69350001	69450000	3.26574
8	69400001	69500000	3.1863
8	69450001	69550000	1.99715
8	71050001	71150000	1.10857
8	78900001	79000000	1.11101
8	78950001	79050000	1.2321
8	79000001	79100000	1.41831
8	79050001	79150000	1.16312
8	79300001	79400000	1.63074
8	79350001	79450000	1.79519
8	79400001	79500000	1.45156
8	79450001	79550000	1.19823
8	82800001	82900000	1.40272
8	82850001	82950000	1.66355
8	84450001	84550000	1.42192
8	84500001	84600000	1.45277
8	84550001	84650000	1.63531
8	84600001	84700000	1.78098
8	84650001	84750000	1.67443
8	85550001	85650000	1.1303
8	85600001	85700000	1.20096
8	86500001	86600000	1.10015
8	86550001	86650000	1.20175
8	87400001	87500000	1.21462
8	87450001	87550000	1.15587
8	87500001	87600000	1.13237
8	87600001	87700000	1.13329
8	87700001	87800000	1.14893
8	87750001	87850000	1.27446
8	87800001	87900000	1.16896
8	88450001	88550000	1.1889
8	88500001	88600000	1.20592
8	88550001	88650000	1.24043
8	90450001	90550000	1.1343
8	90750001	90850000	1.6572
8	90800001	90900000	1.55455
8	90850001	90950000	1.09697
8	91450001	91550000	1.12152
8	91800001	91900000	1.14206
8	92550001	92650000	1.09975
8	92600001	92700000	1.1206
8	93800001	93900000	1.36575
8	93850001	93950000	1.2826
8	94000001	94100000	1.17889
8	94050001	94150000	1.10155
8	94250001	94350000	2.61489
8	94300001	94400000	3.78931
8	94350001	94450000	2.05694
8	94400001	94500000	1.31528
8	94450001	94550000	1.33772
8	94500001	94600000	1.55843
8	94550001	94650000	1.61312
8	94600001	94700000	1.39389
8	95800001	95900000	1.15563
8	96000001	96100000	1.14275
8	96500001	96600000	1.12527
8	96750001	96850000	1.40386
8	96800001	96900000	1.44882
8	96850001	96950000	1.46961
8	96900001	97000000	1.29996
8	97050001	97150000	1.10243
8	98350001	98450000	1.31316
8	98450001	98550000	1.18837
8	98500001	98600000	1.26864
8	99600001	99700000	1.1428
8	99650001	99750000	1.36243
8	99700001	99800000	1.29631
8	99750001	99850000	1.29574
8	99800001	99900000	1.27827
8	99850001	99950000	1.30212
8	99900001	100000000	1.42066
8	99950001	100050000	1.58691
8	100000001	100100000	1.1642
8	100050001	100150000	1.22025
8	100550001	100650000	1.38887
8	100950001	101050000	1.18366
8	101000001	101100000	1.37583
8	101050001	101150000	1.62395
8	101100001	101200000	1.4246
8	101250001	101350000	1.16034
8	101600001	101700000	1.20536
8	101650001	101750000	1.18368
8	101850001	101950000	1.20184
8	101900001	102000000	1.33982
8	101950001	102050000	1.1885
8	102100001	102200000	1.14482
8	102150001	102250000	1.2219
8	102200001	102300000	1.20701
8	102250001	102350000	1.28574
8	102300001	102400000	1.16517
8	102550001	102650000	1.10094
8	102800001	102900000	1.13663
8	102850001	102950000	1.48057
8	102900001	103000000	1.21062
8	102950001	103050000	1.13097
8	103000001	103100000	1.26555
8	103050001	103150000	1.18032
8	103100001	103200000	1.15354
8	103150001	103250000	1.15737
8	103250001	103350000	1.11088
8	103300001	103400000	1.10661
8	103650001	103750000	1.21185
8	104400001	104500000	1.15266
8	105350001	105450000	1.17143
8	105400001	105500000	1.11921
8	105700001	105800000	1.09851
8	105900001	106000000	1.11056
8	105950001	106050000	1.29385
8	106000001	106100000	1.26043
8	106450001	106550000	1.0955
8	116300001	116400000	1.15451
8	116350001	116450000	1.18511
8	116400001	116500000	1.12014
8	116750001	116850000	1.09814
8	116900001	117000000	1.30385
8	116950001	117050000	1.44131
8	117000001	117100000	1.20755
8	117200001	117300000	1.2789
8	117250001	117350000	1.28927
8	117650001	117750000	1.18941
8	117700001	117800000	1.17706
8	117850001	117950000	1.12641
8	118050001	118150000	1.22942
8	118100001	118200000	1.23634
8	118750001	118850000	1.19914
8	121250001	121350000	1.1378
8	121300001	121400000	1.56856
8	121350001	121450000	1.34136
8	123650001	123750000	1.13636
8	136650001	136750000	1.10167
8	137850001	137950000	1.14269
8	137900001	138000000	1.18575
8	137950001	138050000	1.55026
8	138000001	138100000	2.6751
8	138050001	138150000	1.68904
8	138750001	138850000	1.27425
8	138800001	138900000	1.47534
8	138850001	138950000	1.35571
9	11800001	11900000	1.18232
9	12400001	12500000	1.09869
9	13050001	13150000	1.1692
9	13100001	13200000	1.18391
9	13600001	13700000	1.12048
9	17300001	17400000	1.09952
9	17350001	17450000	1.11004
9	17650001	17750000	1.18619
9	17700001	17800000	1.41196
9	17750001	17850000	1.39655
9	17800001	17900000	1.42089
9	17850001	17950000	1.39264
9	17900001	18000000	1.14781
9	17950001	18050000	1.11182
9	18000001	18100000	1.23209
9	18050001	18150000	1.19437
9	18100001	18200000	1.11276
9	18150001	18250000	1.10605
9	18200001	18300000	1.18824
9	18250001	18350000	1.15585
9	21100001	21200000	1.28036
9	21150001	21250000	1.12444
9	21250001	21350000	1.14181
9	21300001	21400000	1.19425
9	21550001	21650000	1.19498
9	21600001	21700000	1.27846
9	21650001	21750000	1.19912
9	21900001	22000000	1.15567
9	21950001	22050000	1.10227
9	23050001	23150000	1.102
9	23100001	23200000	1.642
9	23150001	23250000	1.15773
9	23400001	23500000	1.24895
9	23450001	23550000	1.91459
9	23500001	23600000	1.64754
9	26650001	26750000	1.44003
9	26700001	26800000	1.23391
9	28400001	28500000	1.11357
9	29650001	29750000	1.1354
9	30900001	31000000	1.10357
9	30950001	31050000	1.17261
9	31300001	31400000	1.09894
9	31350001	31450000	1.10329
9	32250001	32350000	1.23259
9	37600001	37700000	1.10909
9	38600001	38700000	1.80111
9	38650001	38750000	1.32988
9	38850001	38950000	1.19934
9	39300001	39400000	1.39975
9	39350001	39450000	1.54312
9	44300001	44400000	1.12999
9	52150001	52250000	1.13164
9	52950001	53050000	1.26583
9	53000001	53100000	1.10374
9	53050001	53150000	1.09799
9	53100001	53200000	1.13955
9	55400001	55500000	1.1917
9	55450001	55550000	1.15762
9	69300001	69400000	1.15431
9	69350001	69450000	1.30033
9	69400001	69500000	1.4475
9	69650001	69750000	1.10066
9	70050001	70150000	1.57959
9	70800001	70900000	1.2222
9	71750001	71850000	1.19804
9	77100001	77200000	1.28073
9	77150001	77250000	1.3432
9	77500001	77600000	1.31447
9	77650001	77750000	1.11102
9	78550001	78650000	1.2237
9	78600001	78700000	1.29576
9	79400001	79500000	1.25564
9	79550001	79650000	1.44332
9	79600001	79700000	1.53435
9	79850001	79950000	1.3805
9	79900001	80000000	1.40491
9	80950001	81050000	1.23675
9	82500001	82600000	1.54049
9	82550001	82650000	1.2141
9	83150001	83250000	1.17694
9	83750001	83850000	1.1477
9	83800001	83900000	1.39473
9	83850001	83950000	1.45013
9	84600001	84700000	1.31305
9	84650001	84750000	1.34734
9	84700001	84800000	1.29761
9	84750001	84850000	1.3327
9	84900001	85000000	1.16469
9	85650001	85750000	1.13507
9	85700001	85800000	1.72843
9	85750001	85850000	1.61075
9	85800001	85900000	1.14005
9	95150001	95250000	1.48908
9	97250001	97350000	1.12742
9	100250001	100350000	1.23918
9	102250001	102350000	1.21706
9	102300001	102400000	1.15034
9	102400001	102500000	1.63512
9	102450001	102550000	1.70399
9	102500001	102600000	1.19993
9	104250001	104350000	1.17108
9	113850001	113950000	1.3316
9	113900001	114000000	1.29375
9	113950001	114050000	1.4245
9	116900001	117000000	1.09565
9	122300001	122400000	1.23517
9	137900001	138000000	1.13349
9	138900001	139000000	1.14284
9	138950001	139050000	1.48328
9	139000001	139100000	1.60113
9	139050001	139150000	1.28445
9	139100001	139200000	1.42
9	139150001	139250000	1.26133
9	139200001	139300000	1.10168
10	27250001	27350000	1.10933
10	32300001	32400000	1.17473
10	32350001	32450000	1.11235
10	34800001	34900000	1.186
10	35050001	35150000	1.14291
10	35100001	35200000	1.22283
10	35700001	35800000	1.19353
10	45800001	45900000	1.11621
11	7350001	7450000	1.13272
11	15950001	16050000	1.40005
11	16000001	16100000	1.36927
11	29600001	29700000	1.13549
11	29750001	29850000	1.3882
11	30250001	30350000	1.44806
11	30750001	30850000	1.26388
11	31850001	31950000	1.09611
11	31900001	32000000	1.77737
11	31950001	32050000	1.58252
11	32250001	32350000	1.15277
11	32300001	32400000	1.26532
11	32350001	32450000	1.17041
11	32400001	32500000	1.2855
11	32450001	32550000	1.21374
11	32500001	32600000	1.35126
11	32550001	32650000	1.75182
11	32600001	32700000	1.33352
11	32650001	32750000	1.27468
11	32700001	32800000	1.69064
11	32950001	33050000	1.16635
11	33000001	33100000	1.16298
11	33400001	33500000	1.10178
11	33500001	33600000	1.15062
11	33550001	33650000	1.40253
11	33600001	33700000	1.16461
11	33650001	33750000	1.32736
11	33700001	33800000	1.46051
11	33850001	33950000	1.11498
11	33900001	34000000	1.12028
11	38650001	38750000	1.10052
11	39600001	39700000	1.21761
11	39650001	39750000	1.69424
11	39700001	39800000	1.31719
11	40000001	40100000	1.10053
11	42600001	42700000	1.33089
11	42650001	42750000	1.32955
11	43000001	43100000	1.30086
11	43650001	43750000	1.27438
11	43700001	43800000	1.45781
11	44800001	44900000	1.13285
11	45600001	45700000	1.14412
11	56500001	56600000	1.22612
11	64550001	64650000	1.11334
11	66700001	66800000	1.16764
11	66750001	66850000	1.13439
11	67550001	67650000	1.1285
11	68050001	68150000	1.17454
11	68200001	68300000	1.1108
11	68450001	68550000	1.17215
11	68500001	68600000	1.22368
11	70300001	70400000	1.15675
11	70350001	70450000	1.2297
11	71850001	71950000	1.14108
11	71900001	72000000	1.23477
11	71950001	72050000	1.22782
11	72000001	72100000	1.11897
11	72350001	72450000	1.18625
11	73150001	73250000	1.13562
11	73200001	73300000	1.12159
11	73300001	73400000	1.14859
11	73350001	73450000	1.1533
11	73400001	73500000	1.39979
11	73450001	73550000	1.47411
11	73500001	73600000	1.22348
11	73550001	73650000	1.30041
11	73600001	73700000	1.32503
11	73650001	73750000	1.36674
11	73700001	73800000	1.73957
11	73750001	73850000	1.29309
11	74900001	75000000	1.17381
11	74950001	75050000	1.26403
11	75000001	75100000	1.25971
11	75050001	75150000	1.37926
11	75100001	75200000	1.19075
12	13500001	13600000	1.38252
12	13550001	13650000	1.38805
12	14500001	14600000	1.49887
12	17250001	17350000	1.13127
12	17300001	17400000	1.12993
12	27050001	27150000	1.18228
12	27300001	27400000	1.10829
12	27600001	27700000	1.11056
12	27800001	27900000	1.1895
12	27850001	27950000	1.31613
12	28950001	29050000	1.11736
12	29000001	29100000	1.10075
12	29200001	29300000	1.22213
12	30600001	30700000	1.16955
12	30650001	30750000	1.16127
12	31200001	31300000	1.20045
12	31250001	31350000	1.21431
12	31350001	31450000	1.10449
12	31800001	31900000	1.15005
12	32200001	32300000	1.11246
12	32250001	32350000	1.18499
12	44350001	44450000	1.21766
12	44400001	44500000	1.35201
12	44900001	45000000	1.12679
12	45600001	45700000	1.61515
12	45650001	45750000	2.06288
12	50750001	50850000	1.10818
12	55550001	55650000	1.1065
12	55600001	55700000	1.11231
12	56150001	56250000	1.1838
12	56700001	56800000	1.12927
12	56850001	56950000	1.14276
12	60850001	60950000	1.13565
12	61250001	61350000	1.1424
12	61300001	61400000	1.12356
13	15250001	15350000	1.35144
13	15300001	15400000	1.43496
13	15450001	15550000	1.20951
13	16300001	16400000	1.1488
13	16350001	16450000	1.25623
13	16800001	16900000	1.18438
13	17050001	17150000	1.12175
13	17100001	17200000	1.19805
13	17150001	17250000	1.2247
13	17400001	17500000	1.10093
13	18200001	18300000	1.10105
13	18350001	18450000	1.10375
13	18400001	18500000	1.14127
13	20100001	20200000	1.10285
13	20150001	20250000	1.1582
13	20200001	20300000	1.57663
13	20250001	20350000	1.23308
13	23350001	23450000	1.10023
13	23400001	23500000	1.1354
13	23450001	23550000	1.45875
13	23500001	23600000	1.34611
13	23600001	23700000	1.1665
13	23650001	23750000	1.65422
13	23700001	23800000	1.85889
13	23750001	23850000	1.62263
13	23800001	23900000	1.37354
13	23850001	23950000	1.16127
13	24200001	24300000	1.42393
13	24250001	24350000	1.24324
13	24500001	24600000	1.23954
13	24550001	24650000	1.09711
13	24600001	24700000	1.33127
13	24650001	24750000	1.24445
13	24900001	25000000	1.21913
13	24950001	25050000	1.23878
13	25000001	25100000	1.15434
13	25050001	25150000	1.10439
13	25100001	25200000	1.11674
13	25150001	25250000	1.21151
13	25200001	25300000	1.26789
13	25250001	25350000	1.11168
13	25300001	25400000	1.09744
13	25350001	25450000	1.15095
13	27650001	27750000	1.10409
13	27700001	27800000	1.18899
13	27850001	27950000	1.37293
13	27900001	28000000	2.11236
13	27950001	28050000	1.76921
13	28000001	28100000	1.66041
13	28050001	28150000	1.41086
13	28100001	28200000	1.87428
13	28150001	28250000	1.88983
13	28200001	28300000	1.27254
13	28250001	28350000	1.15592
13	28450001	28550000	1.16833
13	28500001	28600000	1.26899
13	28550001	28650000	1.19336
13	28750001	28850000	1.11654
13	30400001	30500000	1.16659
13	30450001	30550000	1.42065
13	30500001	30600000	1.26914
13	30850001	30950000	1.10942
13	30900001	31000000	1.11655
13	31300001	31400000	1.10075
13	31350001	31450000	1.26103
13	31600001	31700000	1.15339
13	31650001	31750000	1.60435
13	31700001	31800000	1.22011
13	35350001	35450000	1.23493
13	41000001	41100000	1.11533
13	41050001	41150000	1.191
13	41100001	41200000	1.13052
13	41250001	41350000	1.21114
13	41800001	41900000	1.17474
13	41950001	42050000	1.30116
13	42250001	42350000	1.10501
13	42450001	42550000	1.11062
13	42500001	42600000	1.13126
13	42550001	42650000	1.1175
13	42850001	42950000	1.22799
13	42900001	43000000	1.30701
13	42950001	43050000	1.21517
13	47000001	47100000	1.19737
13	47050001	47150000	1.09703
13	48250001	48350000	1.21845
13	48300001	48400000	1.28641
13	48350001	48450000	1.15455
13	48800001	48900000	1.0956
13	49050001	49150000	1.30361
13	49100001	49200000	1.19774
13	49400001	49500000	1.1261
13	49550001	49650000	1.16246
13	49600001	49700000	1.18977
13	50000001	50100000	1.15354
13	50050001	50150000	1.10894
13	50250001	50350000	1.19117
13	50450001	50550000	1.10402
13	51000001	51100000	1.09591
13	51450001	51550000	1.16286
13	51500001	51600000	1.46335
13	51550001	51650000	1.47604
13	51600001	51700000	1.20772
13	51800001	51900000	1.10331
13	51850001	51950000	1.14977
13	51900001	52000000	1.2831
13	51950001	52050000	1.18116
13	52000001	52100000	1.18791
13	52050001	52150000	1.30744
13	52100001	52200000	1.11384
13	52300001	52400000	1.25754
13	52350001	52450000	1.53649
13	52400001	52500000	1.31394
13	52450001	52550000	1.21978
13	52650001	52750000	1.10266
13	52750001	52850000	1.1454
13	52800001	52900000	1.36612
13	52850001	52950000	1.40471
13	52900001	53000000	1.41752
13	52950001	53050000	1.28639
13	53000001	53100000	1.23568
13	53050001	53150000	1.23809
13	53100001	53200000	1.25721
13	53150001	53250000	1.31843
13	53200001	53300000	1.47447
13	53250001	53350000	1.52362
13	53300001	53400000	1.55818
13	53350001	53450000	1.55701
13	53400001	53500000	1.23826
13	53450001	53550000	1.17967
13	53500001	53600000	1.49876
13	53550001	53650000	1.63136
13	53600001	53700000	1.10751
13	53900001	54000000	1.15203
13	53950001	54050000	1.15873
13	54000001	54100000	1.16316
13	54050001	54150000	1.13943
13	54100001	54200000	1.16002
13	54150001	54250000	1.2751
13	54200001	54300000	1.29132
13	54250001	54350000	1.17724
13	54400001	54500000	1.14484
13	54500001	54600000	1.19737
13	54550001	54650000	1.31881
13	54600001	54700000	1.10582
13	54650001	54750000	1.1744
13	54700001	54800000	1.18567
13	54750001	54850000	1.26894
13	54800001	54900000	1.22318
13	54850001	54950000	1.29326
13	54900001	55000000	1.5497
13	54950001	55050000	1.38654
13	55000001	55100000	1.61334
13	55050001	55150000	1.37779
13	55200001	55300000	1.22673
13	55250001	55350000	1.34866
13	55300001	55400000	1.39268
13	55350001	55450000	1.38748
13	55400001	55500000	1.48524
13	55450001	55550000	1.52215
13	55500001	55600000	1.25243
13	55600001	55700000	1.141
13	55650001	55750000	1.3539
13	55700001	55800000	1.31532
13	55750001	55850000	1.22451
13	55800001	55900000	1.30524
13	55850001	55950000	1.54913
13	55900001	56000000	1.48608
13	55950001	56050000	1.20214
13	56350001	56450000	1.27656
13	56400001	56500000	1.50947
13	56450001	56550000	1.18813
13	56750001	56850000	1.65932
13	56800001	56900000	1.97996
13	56850001	56950000	1.62904
13	56900001	57000000	1.21089
13	57050001	57150000	1.28173
13	57100001	57200000	1.18989
13	57150001	57250000	1.13309
13	57200001	57300000	1.23098
13	57250001	57350000	1.23485
13	57300001	57400000	1.24905
13	57350001	57450000	1.23464
13	57400001	57500000	1.2545
13	57450001	57550000	1.19261
13	57550001	57650000	1.09541
13	57750001	57850000	1.10555
13	57800001	57900000	1.14304
13	57850001	57950000	1.18634
13	57900001	58000000	1.13856
13	57950001	58050000	1.13872
13	58000001	58100000	1.18151
13	58100001	58200000	1.1081
13	58150001	58250000	1.25905
13	58200001	58300000	1.20359
13	58300001	58400000	1.18012
13	58350001	58450000	1.92201
13	58400001	58500000	2.34993
13	58450001	58550000	2.13976
13	58500001	58600000	1.71627
13	58550001	58650000	1.13407
13	58600001	58700000	1.99363
13	58650001	58750000	1.76776
13	58700001	58800000	1.77742
13	58750001	58850000	1.67113
13	58800001	58900000	1.19051
13	58850001	58950000	1.12474
13	58900001	59000000	1.1811
13	58950001	59050000	1.14212
13	59200001	59300000	1.12007
13	59350001	59450000	1.23957
13	59400001	59500000	1.15586
13	59450001	59550000	1.18255
13	59600001	59700000	1.10357
13	59650001	59750000	1.38596
13	59700001	59800000	1.09662
13	60800001	60900000	1.28502
13	60850001	60950000	1.60439
13	60900001	61000000	1.19372
13	62550001	62650000	1.14018
13	62600001	62700000	1.10506
13	63200001	63300000	1.17785
13	64250001	64350000	1.23207
13	64300001	64400000	1.17936
13	64650001	64750000	1.20974
13	64700001	64800000	1.36977
13	65550001	65650000	1.10398
13	65900001	66000000	1.20011
13	65950001	66050000	1.18448
13	66000001	66100000	1.21434
13	66050001	66150000	1.3944
13	66100001	66200000	1.54017
13	66150001	66250000	1.31065
13	66200001	66300000	1.18452
13	66250001	66350000	1.3917
13	66300001	66400000	1.31127
13	66500001	66600000	1.14401
13	66550001	66650000	1.12333
13	66600001	66700000	1.19811
13	66650001	66750000	1.29279
13	66700001	66800000	1.38033
13	66750001	66850000	1.40906
13	66800001	66900000	1.32342
13	66850001	66950000	1.71927
13	66900001	67000000	1.6624
13	66950001	67050000	1.15521
13	67000001	67100000	1.24343
13	67200001	67300000	1.30896
13	67250001	67350000	1.50418
13	67300001	67400000	1.30029
13	67350001	67450000	1.2908
13	67400001	67500000	1.32798
13	67450001	67550000	1.22715
13	67500001	67600000	1.21467
13	67550001	67650000	1.30639
13	67600001	67700000	1.29893
13	67650001	67750000	1.36461
13	67700001	67800000	1.46127
13	67750001	67850000	1.91683
13	67800001	67900000	1.66811
13	67850001	67950000	1.27096
13	67900001	68000000	1.27991
13	67950001	68050000	1.34097
13	68000001	68100000	1.34374
13	68050001	68150000	1.32517
13	68100001	68200000	1.4104
13	68150001	68250000	1.35328
13	68200001	68300000	1.28985
13	68250001	68350000	1.20405
13	68300001	68400000	1.1529
13	68400001	68500000	1.1606
13	68450001	68550000	1.41195
13	68500001	68600000	1.40624
13	68550001	68650000	1.29773
13	68600001	68700000	1.3585
13	68650001	68750000	1.27612
13	68700001	68800000	1.18703
13	68750001	68850000	1.17223
13	68800001	68900000	1.3194
13	68850001	68950000	1.38592
13	68900001	69000000	1.41483
13	68950001	69050000	1.70438
13	69000001	69100000	2.07704
13	69050001	69150000	2.7649
13	69100001	69200000	2.02397
13	69150001	69250000	1.3717
13	69200001	69300000	1.7024
13	69250001	69350000	1.7249
13	69300001	69400000	1.1499
13	69350001	69450000	1.11755
13	69900001	70000000	1.14985
13	78750001	78850000	1.15601
13	79350001	79450000	1.19146
13	79500001	79600000	1.30643
13	79550001	79650000	1.46793
13	79600001	79700000	1.49991
13	79650001	79750000	1.19905
13	84450001	84550000	1.12005
13	84500001	84600000	1.63551
13	90500001	90600000	1.12464
13	90550001	90650000	1.22637
13	92100001	92200000	1.12765
13	93500001	93600000	1.1757
13	93550001	93650000	1.15472
13	94750001	94850000	1.14634
13	94800001	94900000	1.10836
13	95650001	95750000	1.09575
13	96350001	96450000	1.10361
13	97000001	97100000	1.10581
13	97050001	97150000	1.30655
13	97100001	97200000	1.27452
13	97200001	97300000	1.16726
13	97250001	97350000	1.88173
13	97300001	97400000	1.37868
13	97450001	97550000	1.2728
13	99050001	99150000	1.09754
13	99100001	99200000	1.18587
13	99750001	99850000	1.37478
13	99800001	99900000	1.70867
13	99850001	99950000	1.76099
13	99900001	100000000	1.66271
13	99950001	100050000	1.33554
13	100000001	100100000	1.11026
13	100050001	100150000	1.16187
13	100450001	100550000	1.1047
13	100950001	101050000	1.40197
13	101000001	101100000	1.13748
13	101400001	101500000	1.14811
13	101550001	101650000	1.19909
13	101600001	101700000	1.16093
13	101650001	101750000	1.13178
13	101700001	101800000	1.30705
13	102600001	102700000	1.23782
13	102750001	102850000	1.22537
13	102800001	102900000	1.32875
13	102850001	102950000	1.40148
13	102900001	103000000	1.49379
13	102950001	103050000	1.24723
13	103400001	103500000	1.29058
13	103600001	103700000	1.57766
13	103650001	103750000	1.34794
13	103800001	103900000	1.11694
13	103850001	103950000	1.14106
13	104050001	104150000	1.12214
13	104100001	104200000	1.19241
13	104300001	104400000	1.18428
13	104350001	104450000	1.14527
13	104800001	104900000	1.15102
13	104850001	104950000	1.56801
13	104900001	105000000	1.55422
13	104950001	105050000	1.33274
13	105000001	105100000	1.29947
13	105700001	105800000	1.32513
13	105750001	105850000	1.26042
13	105800001	105900000	1.10631
13	107300001	107400000	1.15692
13	107350001	107450000	1.38645
13	107400001	107500000	1.35299
13	108400001	108500000	1.20327
13	108450001	108550000	1.68087
13	108500001	108600000	1.23376
13	108700001	108800000	1.10141
13	109450001	109550000	1.21479
13	112450001	112550000	1.11194
13	125900001	126000000	1.1936
13	134400001	134500000	1.3687
13	134450001	134550000	2.46438
13	134500001	134600000	2.13789
13	134550001	134650000	1.3762
13	140400001	140500000	1.11317
13	146000001	146100000	1.57454
13	146050001	146150000	1.15388
13	147250001	147350000	1.10371
13	151700001	151800000	1.4018
13	151750001	151850000	1.43242
13	153400001	153500000	1.14545
13	153550001	153650000	1.1283
13	153600001	153700000	1.42974
13	153650001	153750000	1.28737
13	153800001	153900000	1.31273
13	153850001	153950000	1.19855
13	154450001	154550000	1.18973
13	154500001	154600000	1.58303
13	154550001	154650000	1.23377
13	154700001	154800000	1.11288
13	155000001	155100000	1.54801
13	155050001	155150000	1.74433
13	155100001	155200000	1.64739
13	155150001	155250000	1.56217
13	155200001	155300000	1.52865
13	155250001	155350000	1.61371
13	155300001	155400000	1.60118
13	155350001	155450000	1.20972
13	155400001	155500000	1.30331
13	155450001	155550000	1.38917
13	155500001	155600000	1.25607
13	156050001	156150000	1.15714
13	156100001	156200000	1.35547
13	156300001	156400000	1.10642
13	156850001	156950000	1.50255
13	156900001	157000000	1.22493
13	156950001	157050000	1.17843
13	157450001	157550000	1.16371
13	157500001	157600000	1.21132
13	157550001	157650000	1.26246
13	157600001	157700000	1.22565
13	157650001	157750000	1.17693
13	158000001	158100000	1.11568
13	158750001	158850000	1.1013
13	159000001	159100000	1.24802
13	159050001	159150000	1.3338
13	159150001	159250000	1.13234
13	159500001	159600000	1.22403
13	159550001	159650000	1.15662
13	159600001	159700000	1.14751
13	159650001	159750000	1.16308
13	159700001	159800000	1.14406
13	159750001	159850000	1.64954
13	159800001	159900000	1.50934
13	159850001	159950000	1.2508
13	159900001	160000000	1.25273
13	160050001	160150000	1.42126
13	160100001	160200000	1.15319
13	164500001	164600000	1.17096
13	166500001	166600000	1.44882
13	167050001	167150000	1.13556
13	168900001	169000000	1.15132
13	168950001	169050000	1.22038
13	169250001	169350000	1.11941
13	169900001	170000000	1.21072
13	170100001	170200000	1.32172
13	170150001	170250000	1.55418
13	170350001	170450000	2.34317
13	170400001	170500000	1.6926
13	172100001	172200000	1.33138
13	172150001	172250000	1.11429
13	172750001	172850000	1.17039
13	173600001	173700000	1.11526
13	173650001	173750000	1.35731
13	173700001	173800000	1.25171
13	173750001	173850000	1.34086
13	173800001	173900000	1.20265
13	173850001	173950000	1.09995
13	174000001	174100000	1.23149
13	174050001	174150000	1.83948
13	174100001	174200000	2.05144
13	174150001	174250000	1.80164
13	174200001	174300000	1.51371
13	174250001	174350000	1.39328
13	174300001	174400000	1.35859
13	174350001	174450000	1.43278
13	174400001	174500000	1.59568
13	174450001	174550000	2.25896
13	174500001	174600000	1.6416
13	174750001	174850000	1.11298
13	174850001	174950000	1.17804
13	174900001	175000000	1.84322
13	174950001	175050000	1.38084
13	175200001	175300000	1.20981
13	175250001	175350000	1.13437
13	176200001	176300000	1.13094
13	176550001	176650000	1.23919
13	176600001	176700000	1.09927
13	185250001	185350000	1.14683
13	185300001	185400000	1.19779
13	188350001	188450000	1.17717
13	188400001	188500000	1.3481
14	5100001	5200000	1.11691
14	6000001	6100000	1.18486
14	9350001	9450000	1.14929
14	9400001	9500000	1.90471
14	9450001	9550000	1.36606
14	15050001	15150000	1.14439
14	15100001	15200000	1.17676
14	15150001	15250000	1.10168
14	39950001	40050000	1.13595
14	40400001	40500000	1.31732
14	40450001	40550000	1.1876
14	47200001	47300000	1.23616
14	47250001	47350000	1.49998
14	47300001	47400000	1.49172
14	47350001	47450000	1.66602
14	47400001	47500000	1.47528
14	47450001	47550000	1.4519
14	47500001	47600000	1.1234
14	47550001	47650000	1.12172
14	48050001	48150000	1.11833
14	48100001	48200000	1.2792
14	48150001	48250000	1.46787
14	48200001	48300000	1.47496
14	48250001	48350000	1.48296
14	48300001	48400000	1.32664
14	48350001	48450000	1.09584
14	48550001	48650000	1.14971
14	48600001	48700000	1.13016
14	49850001	49950000	1.32124
14	49900001	50000000	1.60463
14	50050001	50150000	1.10633
14	50100001	50200000	1.30215
14	50150001	50250000	1.90946
14	50200001	50300000	2.2866
14	50250001	50350000	1.51554
14	50300001	50400000	2.26842
14	50350001	50450000	3.43018
14	50400001	50500000	2.51446
14	50450001	50550000	2.76768
14	50500001	50600000	3.31072
14	50550001	50650000	2.63168
14	50600001	50700000	2.23605
14	50650001	50750000	1.42285
14	51750001	51850000	1.12634
14	51800001	51900000	1.26288
14	51850001	51950000	1.12106
14	57500001	57600000	1.20321
14	58100001	58200000	1.21127
14	58150001	58250000	1.10962
14	60600001	60700000	1.3292
14	60650001	60750000	1.33478
14	60700001	60800000	1.29296
14	60750001	60850000	1.6188
14	60800001	60900000	1.70128
14	60850001	60950000	1.3342
14	61000001	61100000	1.28432
14	61050001	61150000	1.65597
14	61100001	61200000	1.72872
14	61150001	61250000	1.75756
14	61200001	61300000	1.35134
14	61250001	61350000	1.32509
14	61300001	61400000	1.74363
14	61350001	61450000	2.31219
14	61400001	61500000	1.47662
14	61450001	61550000	1.16874
14	61550001	61650000	1.13273
14	61600001	61700000	1.38436
14	61650001	61750000	1.38448
14	61700001	61800000	1.17816
14	62000001	62100000	1.1715
14	62100001	62200000	1.20644
14	62150001	62250000	1.43403
14	62200001	62300000	1.44382
14	62250001	62350000	1.7106
14	62300001	62400000	1.73732
14	62550001	62650000	1.1416
14	62750001	62850000	1.20506
14	62850001	62950000	1.25925
14	62900001	63000000	1.38595
14	62950001	63050000	1.49174
14	63000001	63100000	1.58465
14	63050001	63150000	1.32983
14	63100001	63200000	1.21604
14	63150001	63250000	1.59834
14	63200001	63300000	1.64487
14	63750001	63850000	1.10265
14	63900001	64000000	1.10545
14	64450001	64550000	1.16516
14	64600001	64700000	1.22664
14	66050001	66150000	1.1657
14	66100001	66200000	1.14442
14	67650001	67750000	1.13683
14	79350001	79450000	1.12596
14	79400001	79500000	1.14086
14	82100001	82200000	1.54413
14	82150001	82250000	1.47419
14	82900001	83000000	1.78887
14	82950001	83050000	1.64036
14	83000001	83100000	1.67947
14	83050001	83150000	1.2116
14	83300001	83400000	1.10953
14	84500001	84600000	1.12814
14	86350001	86450000	1.12207
14	86400001	86500000	1.35952
14	90600001	90700000	1.50512
14	90650001	90750000	1.90625
14	91550001	91650000	1.10696
14	93350001	93450000	1.23029
14	93500001	93600000	1.16887
14	93550001	93650000	1.20427
14	94450001	94550000	1.20891
14	95650001	95750000	1.14827
14	95900001	96000000	1.23701
14	96350001	96450000	1.10916
14	96500001	96600000	1.19408
14	96550001	96650000	1.75438
14	97700001	97800000	1.16525
14	101850001	101950000	1.27031
14	101900001	102000000	1.35976
14	101950001	102050000	1.1601
14	103950001	104050000	1.2607
14	104000001	104100000	1.22776
14	104100001	104200000	1.52898
14	104150001	104250000	1.33479
14	104200001	104300000	1.16786
14	104250001	104350000	1.12263
14	104500001	104600000	1.12643
14	105150001	105250000	1.19385
14	110850001	110950000	1.15757
14	114200001	114300000	1.33471
14	116400001	116500000	1.45225
14	116450001	116550000	1.4882
14	116500001	116600000	1.09734
14	116800001	116900000	1.11208
14	116850001	116950000	1.29308
14	116900001	117000000	1.38218
14	118400001	118500000	1.23889
14	118550001	118650000	1.16016
14	118600001	118700000	1.33108
14	121150001	121250000	1.38495
14	121200001	121300000	1.37999
14	121250001	121350000	1.24398
14	121300001	121400000	1.16388
14	121350001	121450000	1.12317
14	121750001	121850000	1.1258
14	121800001	121900000	1.11448
14	123150001	123250000	1.21369
14	123200001	123300000	1.17406
14	127150001	127250000	1.25647
15	7400001	7500000	1.14958
15	7450001	7550000	1.13192
15	16250001	16350000	1.14732
15	17150001	17250000	1.25163
15	17200001	17300000	1.10122
15	18200001	18300000	1.10025
15	18250001	18350000	1.15054
15	19800001	19900000	1.18248
15	19850001	19950000	1.18677
15	20050001	20150000	1.14656
15	20100001	20200000	1.1778
15	32600001	32700000	1.14044
15	32650001	32750000	1.45725
15	32700001	32800000	1.24527
15	35600001	35700000	1.10221
15	67850001	67950000	1.30745
15	67900001	68000000	1.21628
15	67950001	68050000	1.23899
15	68000001	68100000	1.13576
15	68300001	68400000	1.20745
15	69400001	69500000	1.10238
15	69450001	69550000	1.48095
15	69500001	69600000	1.09648
15	69850001	69950000	1.14156
15	71200001	71300000	1.81342
15	71250001	71350000	1.38022
15	75100001	75200000	1.25161
15	75150001	75250000	1.16192
15	75200001	75300000	1.15596
15	75250001	75350000	1.10686
15	75550001	75650000	1.1897
15	76950001	77050000	1.1845
15	77000001	77100000	1.26809
15	77800001	77900000	1.16047
15	78100001	78200000	1.10351
15	78150001	78250000	1.14443
15	78200001	78300000	1.20421
15	78250001	78350000	1.20567
15	78650001	78750000	1.17294
15	78700001	78800000	1.16034
15	89000001	89100000	1.14351
15	89050001	89150000	1.16981
15	97100001	97200000	1.20931
15	97150001	97250000	2.32454
15	97200001	97300000	2.4733
15	97250001	97350000	2.31371
15	97300001	97400000	2.27208
15	97350001	97450000	1.76001
15	97450001	97550000	1.27674
15	97500001	97600000	1.35789
15	98650001	98750000	1.18851
15	98700001	98800000	1.82047
15	98950001	99050000	1.14682
15	99000001	99100000	2.11372
15	99050001	99150000	2.95029
15	99100001	99200000	1.14348
15	101800001	101900000	1.21365
15	107400001	107500000	1.11044
15	107450001	107550000	1.13997
15	124850001	124950000	1.15125
15	124900001	125000000	1.30435
15	124950001	125050000	1.31386
15	125000001	125100000	1.22236
15	140200001	140300000	1.50675
15	140250001	140350000	1.37834
15	140300001	140400000	1.42472
15	140350001	140450000	1.79894
15	140400001	140500000	2.09521
16	2450001	2550000	1.13887
16	2500001	2600000	1.11106
16	13150001	13250000	1.12116
16	18900001	19000000	1.12397
16	18950001	19050000	1.32272
16	19000001	19100000	1.70114
16	19050001	19150000	2.00771
16	19100001	19200000	1.97328
16	19150001	19250000	1.95802
16	19200001	19300000	2.08575
16	19250001	19350000	2.12847
16	19300001	19400000	1.8161
16	28400001	28500000	1.35145
16	28450001	28550000	1.19047
16	35000001	35100000	1.13891
16	35050001	35150000	1.11336
[truncated: 266 more rows]

## Sheet: Table S3
Table S3. Potential candidate regions detected by XP-EHH (Xiangyang Black VS Western pig breeds)
Chr	Start	End	XP-EHH
1	300001	400000	0.193087
1	350001	450000	0.196042
1	1150001	1250000	0.195899
1	1300001	1400000	0.251489
1	1350001	1450000	0.242863
1	1400001	1500000	0.195501
1	1450001	1550000	0.207065
1	1650001	1750000	0.219163
1	1700001	1800000	0.271901
1	1950001	2050000	0.293364
1	2500001	2600000	0.248554
1	2550001	2650000	0.29383
1	10600001	10700000	0.212582
1	12350001	12450000	0.260783
1	20100001	20200000	0.203313
1	20150001	20250000	0.201759
1	21900001	22000000	0.243913
1	25450001	25550000	0.250411
1	27650001	27750000	0.190976
1	28450001	28550000	0.224656
1	42500001	42600000	0.230804
1	47300001	47400000	0.320961
1	47350001	47450000	0.412505
1	47400001	47500000	0.36777
1	47450001	47550000	0.416214
1	47500001	47600000	0.568475
1	47550001	47650000	0.586452
1	47600001	47700000	0.525022
1	47650001	47750000	0.386102
1	47950001	48050000	0.216577
1	48400001	48500000	0.290268
1	52300001	52400000	0.297355
1	52350001	52450000	0.23886
1	80450001	80550000	0.254365
1	80500001	80600000	0.226881
1	80800001	80900000	0.188387
1	95600001	95700000	0.206188
1	206100001	206200000	0.193543
1	266650001	266750000	0.209957
1	266700001	266800000	0.21637
1	266750001	266850000	0.395197
1	266800001	266900000	0.426154
1	266850001	266950000	0.44977
1	266900001	267000000	0.512563
1	266950001	267050000	0.387167
1	273750001	273850000	0.236006
2	200001	300000	0.235963
2	250001	350000	0.233678
2	500001	600000	0.233913
2	10100001	10200000	0.192902
2	10450001	10550000	0.220133
2	10500001	10600000	0.201965
2	12800001	12900000	0.230056
2	12850001	12950000	0.189875
2	12900001	13000000	0.223157
2	12950001	13050000	0.202727
2	14850001	14950000	0.190766
2	16750001	16850000	0.242802
2	21000001	21100000	0.213477
2	22100001	22200000	0.186504
2	22350001	22450000	0.191043
2	22800001	22900000	0.19362
2	23450001	23550000	0.215429
2	23500001	23600000	0.290595
2	23550001	23650000	0.229577
2	30800001	30900000	0.191223
2	34100001	34200000	0.237052
2	34550001	34650000	0.188411
2	39250001	39350000	0.245904
2	39300001	39400000	0.30196
2	41900001	42000000	0.214319
2	43300001	43400000	0.216395
2	43450001	43550000	0.304124
2	43500001	43600000	0.394228
2	46100001	46200000	0.208573
2	107500001	107600000	0.262577
2	114200001	114300000	0.185792
2	115000001	115100000	0.231504
2	115050001	115150000	0.323431
2	115100001	115200000	0.312088
2	115150001	115250000	0.193778
2	119350001	119450000	0.323413
2	119400001	119500000	0.248231
2	119500001	119600000	0.186879
2	148900001	149000000	0.226859
2	150850001	150950000	0.192964
3	800001	900000	0.332628
3	850001	950000	0.372305
3	900001	1000000	0.267904
3	2000001	2100000	0.202132
3	2050001	2150000	0.22427
3	11700001	11800000	0.209363
3	13850001	13950000	0.293583
3	13900001	14000000	0.326568
3	13950001	14050000	0.467541
3	14000001	14100000	0.482023
3	14050001	14150000	0.473003
3	14100001	14200000	0.420094
3	14150001	14250000	0.349955
3	14200001	14300000	0.237787
3	20050001	20150000	0.285859
3	20100001	20200000	0.31377
3	20150001	20250000	0.295343
3	20200001	20300000	0.256266
3	20250001	20350000	0.287868
3	24800001	24900000	0.19934
3	27400001	27500000	0.21493
3	27450001	27550000	0.262813
3	27650001	27750000	0.227419
3	27700001	27800000	0.195206
3	28050001	28150000	0.198016
3	28100001	28200000	0.191541
3	28650001	28750000	0.208122
3	28700001	28800000	0.2069
3	29050001	29150000	0.291163
3	29100001	29200000	0.185901
3	41650001	41750000	0.239771
3	106750001	106850000	0.188084
3	106800001	106900000	0.223438
3	125500001	125600000	0.215557
3	129250001	129350000	0.224903
3	129300001	129400000	0.207495
3	129350001	129450000	0.197753
3	129400001	129500000	0.296712
3	129450001	129550000	0.305979
3	129500001	129600000	0.249262
3	129550001	129650000	0.217615
3	129600001	129700000	0.219232
3	129650001	129750000	0.262261
3	129700001	129800000	0.245788
3	129750001	129850000	0.185883
3	129800001	129900000	0.210771
3	129850001	129950000	0.260997
3	129900001	130000000	0.247971
3	129950001	130050000	0.206037
3	130000001	130100000	0.229386
3	130050001	130150000	0.211515
3	130200001	130300000	0.238788
3	130250001	130350000	0.304703
3	130300001	130400000	0.30317
3	130350001	130450000	0.28553
3	130400001	130500000	0.29414
3	130450001	130550000	0.325066
3	130500001	130600000	0.331607
3	130550001	130650000	0.33211
3	130600001	130700000	0.328321
3	130650001	130750000	0.243172
3	131750001	131850000	0.230911
3	131950001	132050000	0.203701
3	132000001	132100000	0.207226
3	132500001	132600000	0.189344
4	4750001	4850000	0.189205
4	5300001	5400000	0.259084
4	12150001	12250000	0.384526
4	12200001	12300000	0.356071
4	12250001	12350000	0.206358
4	12500001	12600000	0.253635
4	12550001	12650000	0.414984
4	12600001	12700000	0.406399
4	12650001	12750000	0.245401
4	12700001	12800000	0.295473
4	12750001	12850000	0.378852
4	12800001	12900000	0.263469
4	13100001	13200000	0.194481
4	13150001	13250000	0.23527
4	13400001	13500000	0.225355
4	13450001	13550000	0.191113
4	13500001	13600000	0.21179
4	13750001	13850000	0.213996
4	13800001	13900000	0.207975
4	13950001	14050000	0.226207
4	14000001	14100000	0.209593
4	46550001	46650000	0.268825
4	46600001	46700000	0.196788
4	56550001	56650000	0.206889
4	57000001	57100000	0.261924
4	57050001	57150000	0.201209
4	58750001	58850000	0.231991
4	59700001	59800000	0.237789
4	60000001	60100000	0.197856
4	89950001	90050000	0.353777
4	90000001	90100000	0.548742
4	90050001	90150000	0.254938
4	113300001	113400000	0.242564
4	113350001	113450000	0.443617
4	113400001	113500000	0.515472
4	113450001	113550000	0.480252
4	113500001	113600000	0.31331
4	114350001	114450000	0.219966
4	114400001	114500000	0.281273
4	114450001	114550000	0.21057
4	115250001	115350000	0.203926
4	115300001	115400000	0.201618
4	120000001	120100000	0.205515
4	120200001	120300000	0.244571
4	128400001	128500000	0.260681
4	128450001	128550000	0.209536
4	129650001	129750000	0.202348
4	129700001	129800000	0.423907
4	129750001	129850000	0.368294
4	130600001	130700000	0.219733
5	14050001	14150000	0.200513
5	14200001	14300000	0.229078
5	14250001	14350000	0.284697
5	14300001	14400000	0.309838
5	14350001	14450000	0.218691
5	14600001	14700000	0.190271
5	14650001	14750000	0.366033
5	14700001	14800000	0.314401
5	14750001	14850000	0.349951
5	14800001	14900000	0.385626
5	14850001	14950000	0.276782
5	14900001	15000000	0.250663
5	14950001	15050000	0.366943
5	15000001	15100000	0.408671
5	15050001	15150000	0.331264
5	15100001	15200000	0.332095
5	15150001	15250000	0.333968
5	15200001	15300000	0.365495
5	15250001	15350000	0.24345
5	15350001	15450000	0.247545
5	15400001	15500000	0.354715
5	15450001	15550000	0.309962
5	15500001	15600000	0.269091
5	15550001	15650000	0.410714
5	15600001	15700000	0.4805
5	15650001	15750000	0.496424
5	15700001	15800000	0.530951
5	15750001	15850000	0.431291
5	15800001	15900000	0.271753
5	15900001	16000000	0.188225
5	16050001	16150000	0.271815
5	16100001	16200000	0.255194
5	16150001	16250000	0.237292
5	16200001	16300000	0.284407
5	16250001	16350000	0.249122
5	16300001	16400000	0.252199
5	16350001	16450000	0.216126
5	16750001	16850000	0.277588
5	16800001	16900000	0.398583
5	16850001	16950000	0.410727
5	16900001	17000000	0.353633
5	16950001	17050000	0.25393
5	17000001	17100000	0.202973
5	17050001	17150000	0.288396
5	17100001	17200000	0.415799
5	17150001	17250000	0.331239
5	17200001	17300000	0.244046
5	17250001	17350000	0.252668
5	17300001	17400000	0.222586
5	17900001	18000000	0.237651
5	18050001	18150000	0.226666
5	18250001	18350000	0.185701
5	18300001	18400000	0.200954
5	18350001	18450000	0.23735
5	18400001	18500000	0.218885
5	19150001	19250000	0.21297
5	23200001	23300000	0.212308
5	23250001	23350000	0.255918
5	23300001	23400000	0.31263
5	23600001	23700000	0.32801
5	23650001	23750000	0.336407
5	23700001	23800000	0.292341
5	23750001	23850000	0.249817
5	23850001	23950000	0.191172
5	23900001	24000000	0.269019
5	23950001	24050000	0.277446
5	24000001	24100000	0.23929
5	24250001	24350000	0.261195
5	24300001	24400000	0.283736
5	24350001	24450000	0.188808
5	24500001	24600000	0.196241
5	24550001	24650000	0.27748
5	24600001	24700000	0.204287
5	24900001	25000000	0.247025
5	24950001	25050000	0.341262
5	25000001	25100000	0.374678
5	25050001	25150000	0.362339
5	25100001	25200000	0.267126
5	25150001	25250000	0.24954
5	25200001	25300000	0.235385
5	25800001	25900000	0.357467
5	25850001	25950000	0.361369
5	25900001	26000000	0.447126
5	25950001	26050000	0.588634
5	26000001	26100000	0.397712
5	26050001	26150000	0.261689
5	26150001	26250000	0.198139
5	26300001	26400000	0.205281
5	26350001	26450000	0.292341
5	26550001	26650000	0.234072
5	26600001	26700000	0.243138
5	26650001	26750000	0.260592
5	26700001	26800000	0.305848
5	26750001	26850000	0.251194
5	26900001	27000000	0.204705
5	27000001	27100000	0.221834
5	27050001	27150000	0.212596
5	27100001	27200000	0.194433
5	27150001	27250000	0.224479
5	27200001	27300000	0.271064
5	27250001	27350000	0.321825
5	27300001	27400000	0.282834
5	27350001	27450000	0.246355
5	27400001	27500000	0.19398
5	28050001	28150000	0.228227
5	28100001	28200000	0.392708
5	28150001	28250000	0.520534
5	28200001	28300000	0.386192
5	28300001	28400000	0.192524
5	28350001	28450000	0.185764
5	28400001	28500000	0.285719
5	28450001	28550000	0.347096
5	28500001	28600000	0.217145
5	29050001	29150000	0.245125
5	29100001	29200000	0.208909
5	42600001	42700000	0.202062
5	46950001	47050000	0.279773
5	47650001	47750000	0.190441
5	47700001	47800000	0.2211
5	47750001	47850000	0.214981
5	47800001	47900000	0.25586
5	47850001	47950000	0.274071
5	47900001	48000000	0.2553
5	48900001	49000000	0.208847
5	48950001	49050000	0.295533
5	49100001	49200000	0.212757
5	49900001	50000000	0.218157
5	49950001	50050000	0.253903
5	50000001	50100000	0.282333
5	50050001	50150000	0.271015
5	50550001	50650000	0.200304
5	50600001	50700000	0.265542
5	50650001	50750000	0.22419
5	59450001	59550000	0.262877
5	60200001	60300000	0.191234
5	60750001	60850000	0.200498
5	61100001	61200000	0.223939
5	61150001	61250000	0.302731
5	61200001	61300000	0.279162
5	61250001	61350000	0.229067
5	61350001	61450000	0.222961
5	61400001	61500000	0.18939
5	61450001	61550000	0.189839
5	61500001	61600000	0.266465
5	61550001	61650000	0.294884
5	61600001	61700000	0.220364
5	65000001	65100000	0.195369
5	69050001	69150000	0.231924
5	69350001	69450000	0.209563
5	69400001	69500000	0.345489
5	69450001	69550000	0.228913
5	69800001	69900000	0.219489
5	69850001	69950000	0.185891
5	70050001	70150000	0.224339
5	70100001	70200000	0.331692
5	70150001	70250000	0.264818
5	70200001	70300000	0.1917
5	70350001	70450000	0.188464
5	70500001	70600000	0.24661
5	70550001	70650000	0.259358
5	71350001	71450000	0.267631
5	71400001	71500000	0.26853
5	71450001	71550000	0.195657
5	72000001	72100000	0.251654
5	72050001	72150000	0.189649
5	72250001	72350000	0.190441
5	72750001	72850000	0.317037
5	72800001	72900000	0.406137
5	72850001	72950000	0.34112
5	72950001	73050000	0.200626
5	73000001	73100000	0.256345
5	73850001	73950000	0.218347
5	73900001	74000000	0.213362
5	73950001	74050000	0.246113
5	74700001	74800000	0.341584
5	74750001	74850000	0.366663
5	74800001	74900000	0.317668
5	77100001	77200000	0.217596
5	77150001	77250000	0.18815
5	90850001	90950000	0.207043
5	90900001	91000000	0.216872
5	90950001	91050000	0.226596
5	91150001	91250000	0.222717
5	91200001	91300000	0.209507
5	91500001	91600000	0.188921
5	91550001	91650000	0.203089
5	91600001	91700000	0.199028
5	92150001	92250000	0.237488
5	92200001	92300000	0.270224
5	92500001	92600000	0.221866
5	92550001	92650000	0.293608
5	92600001	92700000	0.368309
5	92650001	92750000	0.34113
5	92700001	92800000	0.369011
5	92750001	92850000	0.37659
5	92800001	92900000	0.292926
5	92850001	92950000	0.225552
5	92950001	93050000	0.251131
5	93000001	93100000	0.294462
5	98900001	99000000	0.194969
5	98950001	99050000	0.195758
5	99600001	99700000	0.262979
5	99650001	99750000	0.278482
5	99700001	99800000	0.242924
5	100100001	100200000	0.26401
5	100150001	100250000	0.289426
5	100200001	100300000	0.205468
5	100250001	100350000	0.240423
5	100400001	100500000	0.23036
5	101850001	101950000	0.303245
5	101900001	102000000	0.520539
5	101950001	102050000	0.329833
5	102000001	102100000	0.253557
5	102050001	102150000	0.3849
5	102100001	102200000	0.6175
5	102150001	102250000	0.665659
5	102200001	102300000	0.423462
5	102250001	102350000	0.351259
5	102300001	102400000	0.256318
5	102350001	102450000	0.268937
5	102400001	102500000	0.337708
5	102450001	102550000	0.354901
5	102500001	102600000	0.230128
5	102600001	102700000	0.213801
5	102650001	102750000	0.223795
5	102800001	102900000	0.18798
5	102850001	102950000	0.207221
5	103000001	103100000	0.208235
6	5200001	5300000	0.298298
6	5250001	5350000	0.23591
6	5400001	5500000	0.18582
6	5450001	5550000	0.271848
6	5500001	5600000	0.299541
6	5550001	5650000	0.242322
6	6200001	6300000	0.228537
6	18350001	18450000	0.189661
6	19250001	19350000	0.190367
6	19300001	19400000	0.265564
6	46900001	47000000	0.25222
6	46950001	47050000	0.26891
6	47600001	47700000	0.248392
6	47950001	48050000	0.223033
6	48000001	48100000	0.201539
6	48050001	48150000	0.195981
6	48100001	48200000	0.200297
6	48350001	48450000	0.220429
6	51700001	51800000	0.201805
6	54350001	54450000	0.334592
6	54400001	54500000	0.315449
6	54450001	54550000	0.423312
6	54500001	54600000	0.495845
6	54550001	54650000	0.406346
6	54600001	54700000	0.305158
6	54650001	54750000	0.276277
6	55950001	56050000	0.445433
6	56000001	56100000	0.341431
6	56050001	56150000	0.25366
6	56100001	56200000	0.194536
6	56200001	56300000	0.202556
6	59850001	59950000	0.210518
6	60050001	60150000	0.217706
6	60100001	60200000	0.276275
6	60150001	60250000	0.297531
6	60200001	60300000	0.260175
6	60250001	60350000	0.235912
6	60300001	60400000	0.31168
6	60350001	60450000	0.37727
6	60400001	60500000	0.412786
6	60450001	60550000	0.412803
6	60500001	60600000	0.380414
6	60550001	60650000	0.357335
6	60600001	60700000	0.379984
6	60650001	60750000	0.422584
6	60700001	60800000	0.437318
6	60750001	60850000	0.488649
6	60800001	60900000	0.491651
6	60850001	60950000	0.405948
6	60900001	61000000	0.347115
6	60950001	61050000	0.353444
6	61000001	61100000	0.355515
6	61050001	61150000	0.29783
6	61100001	61200000	0.267639
6	61150001	61250000	0.255548
6	61200001	61300000	0.277272
6	61250001	61350000	0.314262
6	61300001	61400000	0.380651
6	61350001	61450000	0.439041
6	61400001	61500000	0.443385
6	61450001	61550000	0.375468
6	63300001	63400000	0.227053
6	63450001	63550000	0.188732
6	63500001	63600000	0.335182
6	63550001	63650000	0.269367
6	63600001	63700000	0.229322
6	63650001	63750000	0.208625
6	64150001	64250000	0.200733
6	64200001	64300000	0.416841
6	64250001	64350000	0.52282
6	64300001	64400000	0.384133
6	64600001	64700000	0.220191
6	64650001	64750000	0.19969
6	64700001	64800000	0.284861
6	64750001	64850000	0.44839
6	64800001	64900000	0.394494
6	64850001	64950000	0.317943
6	64900001	65000000	0.222423
6	65100001	65200000	0.246397
6	65150001	65250000	0.253059
6	65200001	65300000	0.253541
6	65250001	65350000	0.229023
6	65300001	65400000	0.187497
6	65550001	65650000	0.196468
6	67050001	67150000	0.226848
6	67100001	67200000	0.220952
6	67400001	67500000	0.214367
6	67450001	67550000	0.20249
6	67550001	67650000	0.224936
6	67600001	67700000	0.335138
6	67650001	67750000	0.397549
6	67700001	67800000	0.408885
6	67750001	67850000	0.339666
6	67800001	67900000	0.375589
6	67850001	67950000	0.352679
6	68200001	68300000	0.189193
6	68250001	68350000	0.196317
6	68550001	68650000	0.216829
6	68600001	68700000	0.312454
6	68650001	68750000	0.29401
6	68700001	68800000	0.253942
6	68750001	68850000	0.302175
6	68800001	68900000	0.341428
6	68850001	68950000	0.275837
6	68900001	69000000	0.322609
6	68950001	69050000	0.426386
6	69000001	69100000	0.443025
6	69050001	69150000	0.482401
6	69100001	69200000	0.55388
6	69150001	69250000	0.53943
6	69200001	69300000	0.482839
6	69250001	69350000	0.420744
6	69300001	69400000	0.358938
6	69350001	69450000	0.358647
6	69400001	69500000	0.302871
6	69450001	69550000	0.20195
6	71550001	71650000	0.188068
6	76150001	76250000	0.22821
6	76950001	77050000	0.19805
6	77350001	77450000	0.221943
6	77400001	77500000	0.403886
6	77450001	77550000	0.309459
6	77750001	77850000	0.228
6	77800001	77900000	0.419089
6	77850001	77950000	0.386351
6	77900001	78000000	0.2105
6	78000001	78100000	0.265372
6	78150001	78250000	0.408807
6	78200001	78300000	0.192182
6	78500001	78600000	0.290538
6	78550001	78650000	0.251718
6	78750001	78850000	0.300341
6	78800001	78900000	0.365643
6	78850001	78950000	0.307784
6	78900001	79000000	0.336086
6	78950001	79050000	0.290216
6	79000001	79100000	0.239474
6	79050001	79150000	0.331425
6	79100001	79200000	0.387122
6	79150001	79250000	0.333468
6	79200001	79300000	0.374571
6	79250001	79350000	0.460858
6	79300001	79400000	0.450587
6	79350001	79450000	0.219912
6	79550001	79650000	0.225157
6	79600001	79700000	0.289224
6	79650001	79750000	0.245168
6	79700001	79800000	0.24142
6	79750001	79850000	0.188153
6	79850001	79950000	0.202046
6	80050001	80150000	0.19003
6	80150001	80250000	0.319731
6	80200001	80300000	0.291277
6	80500001	80600000	0.33532
6	80550001	80650000	0.40422
6	80600001	80700000	0.311811
6	80650001	80750000	0.319931
6	80700001	80800000	0.278338
6	80950001	81050000	0.330233
6	81000001	81100000	0.303931
6	81050001	81150000	0.205021
6	81200001	81300000	0.251643
6	81250001	81350000	0.304583
6	81400001	81500000	0.304682
6	81550001	81650000	0.266917
6	81600001	81700000	0.312113
6	81650001	81750000	0.331171
6	81850001	81950000	0.444498
6	81900001	82000000	0.47861
6	81950001	82050000	0.335259
6	82000001	82100000	0.376878
6	82050001	82150000	0.380143
6	82100001	82200000	0.336573
6	82150001	82250000	0.280537
6	82200001	82300000	0.267736
6	82250001	82350000	0.311684
6	82300001	82400000	0.30061
6	82450001	82550000	0.216344
6	82500001	82600000	0.226493
6	82550001	82650000	0.246014
6	86750001	86850000	0.200983
6	90500001	90600000	0.248437
6	93350001	93450000	0.207003
6	93400001	93500000	0.200589
6	96200001	96300000	0.262214
6	96250001	96350000	0.255195
6	96300001	96400000	0.23638
6	96350001	96450000	0.240686
6	96750001	96850000	0.545761
6	96800001	96900000	0.605376
6	96850001	96950000	0.517226
6	96900001	97000000	0.339529
6	96950001	97050000	0.236598
6	97900001	98000000	0.233557
6	99000001	99100000	0.188018
6	99500001	99600000	0.258103
6	99550001	99650000	0.264433
6	101500001	101600000	0.187009
6	104950001	105050000	0.192128
6	105000001	105100000	0.236254
6	105050001	105150000	0.295897
6	105100001	105200000	0.388968
6	105150001	105250000	0.385326
6	105200001	105300000	0.245441
6	105250001	105350000	0.228035
6	127200001	127300000	0.238045
6	130100001	130200000	0.237487
6	130400001	130500000	0.448684
6	130450001	130550000	0.440722
6	130500001	130600000	0.377935
6	130550001	130650000	0.41746
6	130600001	130700000	0.462577
6	130650001	130750000	0.461307
6	130700001	130800000	0.451035
6	130750001	130850000	0.309995
6	132050001	132150000	0.205023
6	132100001	132200000	0.329006
6	132300001	132400000	0.486819
6	132350001	132450000	0.724623
6	132400001	132500000	0.545414
6	132450001	132550000	0.604771
6	132500001	132600000	0.846673
6	132550001	132650000	0.979207
6	132600001	132700000	0.492426
6	135950001	136050000	0.189884
6	139550001	139650000	0.296286
6	139600001	139700000	0.35191
6	139650001	139750000	0.255924
6	139900001	140000000	0.195639
6	140000001	140100000	0.22123
6	140200001	140300000	0.217277
6	140250001	140350000	0.241647
6	141950001	142050000	0.196078
6	149450001	149550000	0.299824
6	149500001	149600000	0.378725
6	158000001	158100000	0.217763
6	158350001	158450000	0.188904
6	158400001	158500000	0.221412
6	158450001	158550000	0.186128
6	158800001	158900000	0.259577
6	158850001	158950000	0.249223
6	158900001	159000000	0.242901
6	158950001	159050000	0.265478
6	164800001	164900000	0.221393
6	164850001	164950000	0.223181
7	13500001	13600000	0.332136
7	13550001	13650000	0.483415
7	13600001	13700000	0.218351
7	15400001	15500000	0.214198
7	15600001	15700000	0.200011
7	15650001	15750000	0.247542
7	15750001	15850000	0.262057
7	15800001	15900000	0.37045
7	15850001	15950000	0.227162
7	16550001	16650000	0.191239
7	16650001	16750000	0.265059
7	16700001	16800000	0.448521
7	16750001	16850000	0.233662
7	17000001	17100000	0.208964
7	17250001	17350000	0.368895
7	17300001	17400000	0.213597
7	19500001	19600000	0.227466
7	21000001	21100000	0.188444
7	21150001	21250000	0.193832
7	21200001	21300000	0.233118
7	21350001	21450000	0.208199
7	21400001	21500000	0.283305
7	21450001	21550000	0.251252
7	21500001	21600000	0.18854
7	21950001	22050000	0.258588
7	22000001	22100000	0.228796
7	22050001	22150000	0.257904
7	22100001	22200000	0.195267
7	22250001	22350000	0.205393
7	22300001	22400000	0.321082
7	22900001	23000000	0.203943
7	23450001	23550000	0.249362
7	25300001	25400000	0.228898
7	25350001	25450000	0.239112
7	25400001	25500000	0.228065
7	25700001	25800000	0.225282
7	26000001	26100000	0.233753
7	26050001	26150000	0.211717
7	26700001	26800000	0.293349
7	29150001	29250000	0.306436
7	30700001	30800000	0.246492
7	30750001	30850000	0.257058
7	31150001	31250000	0.237496
7	31200001	31300000	0.272284
7	32050001	32150000	0.245917
7	32100001	32200000	0.285135
7	32150001	32250000	0.260584
7	32200001	32300000	0.276478
7	32300001	32400000	0.29425
7	32350001	32450000	0.273702
7	33000001	33100000	0.19428
7	34400001	34500000	0.233894
7	45350001	45450000	0.221581
7	45400001	45500000	0.438212
7	45450001	45550000	0.511757
7	46450001	46550000	0.187249
7	47500001	47600000	0.19607
7	47900001	48000000	0.253428
7	47950001	48050000	0.186075
7	48050001	48150000	0.221809
7	48100001	48200000	0.20107
7	48600001	48700000	0.366722
7	48650001	48750000	0.427976
7	48700001	48800000	0.23855
7	49200001	49300000	0.239954
7	49250001	49350000	0.268646
7	84800001	84900000	0.222349
7	84850001	84950000	0.206508
7	85050001	85150000	0.233168
7	85100001	85200000	0.210549
7	85250001	85350000	0.208065
7	85300001	85400000	0.264883
7	85350001	85450000	0.228875
7	85550001	85650000	0.196003
7	85600001	85700000	0.236813
7	85650001	85750000	0.26118
7	85700001	85800000	0.228554
7	85850001	85950000	0.217216
7	86050001	86150000	0.187842
7	86250001	86350000	0.213248
7	86300001	86400000	0.420314
7	86350001	86450000	0.364338
7	86750001	86850000	0.215433
7	86800001	86900000	0.247021
7	86850001	86950000	0.240718
7	86900001	87000000	0.288019
7	86950001	87050000	0.247296
7	87000001	87100000	0.191993
7	87050001	87150000	0.214182
7	87100001	87200000	0.28592
7	87150001	87250000	0.372652
7	87200001	87300000	0.34325
7	87250001	87350000	0.223757
7	87300001	87400000	0.242003
7	87350001	87450000	0.219191
7	87400001	87500000	0.260649
7	87450001	87550000	0.308448
7	87500001	87600000	0.205986
7	87550001	87650000	0.220379
7	87600001	87700000	0.275637
7	87650001	87750000	0.284227
7	87700001	87800000	0.287167
7	87750001	87850000	0.275717
7	87800001	87900000	0.212184
7	88000001	88100000	0.287185
7	88050001	88150000	0.451584
7	88100001	88200000	0.354933
7	88150001	88250000	0.261363
7	88200001	88300000	0.298247
7	88250001	88350000	0.24621
7	88600001	88700000	0.186631
7	91150001	91250000	0.191683
7	91200001	91300000	0.237004
7	91850001	91950000	0.208826
7	92350001	92450000	0.288448
7	92400001	92500000	0.407374
7	92450001	92550000	0.422305
7	92500001	92600000	0.29584
7	92900001	93000000	0.211712
7	92950001	93050000	0.186551
7	93250001	93350000	0.257854
7	93300001	93400000	0.336661
7	93350001	93450000	0.189771
7	93400001	93500000	0.188021
7	93550001	93650000	0.186743
7	93600001	93700000	0.303529
7	93650001	93750000	0.288663
7	93800001	93900000	0.318887
7	93850001	93950000	0.354599
7	93900001	94000000	0.354881
7	93950001	94050000	0.363139
7	94000001	94100000	0.385488
7	94050001	94150000	0.380203
7	94100001	94200000	0.408654
7	94150001	94250000	0.441468
7	95100001	95200000	0.203924
7	95950001	96050000	0.210831
7	99750001	99850000	0.186731
7	99800001	99900000	0.252605
7	100200001	100300000	0.272433
7	100250001	100350000	0.251685
7	100500001	100600000	0.274491
7	100550001	100650000	0.31143
7	100600001	100700000	0.266409
7	100650001	100750000	0.232346
7	102800001	102900000	0.399483
7	102850001	102950000	0.265546
7	108300001	108400000	0.261779
7	112250001	112350000	0.279492
7	112300001	112400000	0.236354
7	113250001	113350000	0.226445
7	113300001	113400000	0.236195
7	113950001	114050000	0.214569
7	114000001	114100000	0.364297
7	114050001	114150000	0.615699
7	114100001	114200000	0.323355
7	114550001	114650000	0.232228
7	114600001	114700000	0.410312
7	114650001	114750000	0.350985
7	115050001	115150000	0.215079
7	115950001	116050000	0.217409
7	116350001	116450000	0.316678
7	116400001	116500000	0.272832
7	116500001	116600000	0.25068
7	116550001	116650000	0.372401
7	116600001	116700000	0.193166
8	20500001	20600000	0.214997
8	23100001	23200000	0.251204
8	23900001	24000000	0.349896
8	23950001	24050000	0.356088
8	27700001	27800000	0.234109
8	27750001	27850000	0.191856
8	30000001	30100000	0.194214
8	30400001	30500000	0.204879
8	30450001	30550000	0.253268
8	31800001	31900000	0.244363
8	31850001	31950000	0.21784
8	48250001	48350000	0.206087
8	53300001	53400000	0.208115
8	53700001	53800000	0.311832
8	53750001	53850000	0.243536
8	55100001	55200000	0.435057
8	55150001	55250000	0.487304
8	55200001	55300000	0.312792
8	64850001	64950000	0.211986
8	64900001	65000000	0.340509
8	64950001	65050000	0.307716
8	65000001	65100000	0.247758
8	65050001	65150000	0.224549
8	66650001	66750000	0.270853
8	66700001	66800000	0.523075
8	66750001	66850000	0.399909
8	66800001	66900000	0.202926
8	66850001	66950000	0.267188
8	66900001	67000000	0.338002
8	66950001	67050000	0.442152
8	67000001	67100000	0.457224
8	67050001	67150000	0.470588
8	67100001	67200000	0.536354
8	67150001	67250000	0.535344
8	67200001	67300000	0.650697
8	67250001	67350000	0.638907
8	67300001	67400000	0.627023
8	67350001	67450000	0.364071
8	67450001	67550000	0.192344
8	67500001	67600000	0.47436
8	67550001	67650000	0.192306
8	71450001	71550000	0.309099
8	71500001	71600000	0.211096
8	71550001	71650000	0.201421
8	71600001	71700000	0.218362
8	78950001	79050000	0.238812
8	79000001	79100000	0.351491
8	79050001	79150000	0.205376
8	79200001	79300000	0.312927
8	79250001	79350000	0.390035
8	79300001	79400000	0.56176
8	79350001	79450000	0.519552
8	79400001	79500000	0.349757
8	79450001	79550000	0.194578
8	84450001	84550000	0.295762
8	84500001	84600000	0.426786
8	84550001	84650000	0.567282
8	84600001	84700000	0.602462
8	85600001	85700000	0.236928
8	86350001	86450000	0.191538
8	86750001	86850000	0.229903
8	86800001	86900000	0.205453
8	87400001	87500000	0.351344
8	87450001	87550000	0.331858
8	87500001	87600000	0.237908
8	88500001	88600000	0.281563
8	88550001	88650000	0.340978
8	89400001	89500000	0.26539
8	90100001	90200000	0.196011
8	90250001	90350000	0.23098
8	90400001	90500000	0.246084
8	90450001	90550000	0.359013
8	90500001	90600000	0.244241
8	90600001	90700000	0.18577
8	90650001	90750000	0.302726
8	90700001	90800000	0.419304
8	90750001	90850000	0.442386
8	90800001	90900000	0.433713
8	90850001	90950000	0.311743
8	91450001	91550000	0.269338
8	91500001	91600000	0.214442
8	91650001	91750000	0.296517
8	91700001	91800000	0.191589
8	91750001	91850000	0.232104
8	91800001	91900000	0.337432
8	92050001	92150000	0.186067
8	92400001	92500000	0.240746
8	92450001	92550000	0.195708
8	92550001	92650000	0.195274
8	92600001	92700000	0.271736
8	92650001	92750000	0.249268
8	93000001	93100000	0.206676
8	93050001	93150000	0.238683
8	93350001	93450000	0.216683
8	93800001	93900000	0.255664
8	93850001	93950000	0.205181
8	93950001	94050000	0.22907
8	94000001	94100000	0.298661
8	94050001	94150000	0.245773
8	94100001	94200000	0.191307
8	94200001	94300000	0.433047
8	94250001	94350000	0.76587
8	94300001	94400000	0.742259
8	94350001	94450000	0.458358
8	94400001	94500000	0.325223
8	94450001	94550000	0.432337
8	94500001	94600000	0.519541
8	94550001	94650000	0.485832
8	94600001	94700000	0.38232
8	94650001	94750000	0.294527
8	94700001	94800000	0.205696
8	95200001	95300000	0.205632
8	95250001	95350000	0.202092
8	95800001	95900000	0.220631
8	96150001	96250000	0.235218
8	96700001	96800000	0.232634
8	96750001	96850000	0.298564
8	96800001	96900000	0.399431
8	96850001	96950000	0.426086
8	96900001	97000000	0.279365
8	97050001	97150000	0.280897
8	97800001	97900000	0.253163
8	97850001	97950000	0.211425
8	98350001	98450000	0.240011
8	98400001	98500000	0.18943
8	99400001	99500000	0.207372
8	99450001	99550000	0.221654
8	99600001	99700000	0.298749
8	99650001	99750000	0.400196
8	99700001	99800000	0.431947
8	99750001	99850000	0.359974
8	99800001	99900000	0.267556
8	99850001	99950000	0.25909
8	99900001	100000000	0.249236
8	99950001	100050000	0.195539
8	100050001	100150000	0.24713
8	100100001	100200000	0.213607
8	100500001	100600000	0.234595
8	100550001	100650000	0.552122
8	100600001	100700000	0.242797
8	101100001	101200000	0.206047
8	101700001	101800000	0.234858
8	101750001	101850000	0.225014
8	101800001	101900000	0.270483
8	101850001	101950000	0.356124
8	101900001	102000000	0.364565
8	101950001	102050000	0.346636
8	102000001	102100000	0.310567
8	102050001	102150000	0.358994
8	102100001	102200000	0.409575
8	102150001	102250000	0.414796
8	102200001	102300000	0.532307
8	102250001	102350000	0.543304
8	102300001	102400000	0.432635
8	102350001	102450000	0.264204
8	102500001	102600000	0.224576
8	102550001	102650000	0.202848
8	102700001	102800000	0.332953
8	102750001	102850000	0.406547
8	102800001	102900000	0.493266
8	102850001	102950000	0.638959
8	102900001	103000000	0.632493
8	102950001	103050000	0.559405
8	103000001	103100000	0.551745
8	103050001	103150000	0.586436
8	103100001	103200000	0.50234
8	103150001	103250000	0.314068
8	103200001	103300000	0.279754
8	103250001	103350000	0.341871
8	103300001	103400000	0.287922
8	103350001	103450000	0.231376
8	103400001	103500000	0.264685
8	103450001	103550000	0.196239
8	103600001	103700000	0.261555
8	103650001	103750000	0.446719
8	103700001	103800000	0.29969
8	104400001	104500000	0.190846
8	104700001	104800000	0.219852
8	104750001	104850000	0.330598
8	104800001	104900000	0.28354
8	104950001	105050000	0.243614
8	105000001	105100000	0.317626
8	105050001	105150000	0.262791
8	105250001	105350000	0.185833
8	105300001	105400000	0.296767
8	105350001	105450000	0.464337
8	105400001	105500000	0.464444
8	105450001	105550000	0.355312
8	105500001	105600000	0.235854
8	105650001	105750000	0.225992
8	105700001	105800000	0.248006
8	105850001	105950000	0.268197
8	105900001	106000000	0.340498
8	105950001	106050000	0.353482
8	106000001	106100000	0.315264
8	106050001	106150000	0.198792
8	106300001	106400000	0.198559
8	106400001	106500000	0.196754
8	106450001	106550000	0.305925
8	116300001	116400000	0.44867
8	116350001	116450000	0.410326
8	116400001	116500000	0.257944
8	116450001	116550000	0.345192
8	116500001	116600000	0.417065
8	116550001	116650000	0.245615
8	116650001	116750000	0.238984
8	116700001	116800000	0.22839
8	116750001	116850000	0.212379
8	116900001	117000000	0.200872
8	117150001	117250000	0.192626
8	117250001	117350000	0.253827
8	117300001	117400000	0.315964
8	117350001	117450000	0.328574
8	117400001	117500000	0.261616
8	117450001	117550000	0.198293
8	117500001	117600000	0.211277
8	117550001	117650000	0.206305
8	117600001	117700000	0.193998
8	117650001	117750000	0.222007
8	117700001	117800000	0.305616
8	117750001	117850000	0.362358
8	117800001	117900000	0.344655
8	117850001	117950000	0.277534
8	117900001	118000000	0.213617
8	117950001	118050000	0.201614
8	118000001	118100000	0.189437
8	118050001	118150000	0.292728
8	118100001	118200000	0.24156
8	121250001	121350000	0.2509
8	121300001	121400000	0.390864
8	121350001	121450000	0.463394
8	121400001	121500000	0.441037
8	121450001	121550000	0.241817
8	121700001	121800000	0.26313
8	121750001	121850000	0.26804
8	122100001	122200000	0.231515
8	122150001	122250000	0.185913
8	123600001	123700000	0.219733
8	123650001	123750000	0.189924
8	124550001	124650000	0.201473
8	138000001	138100000	0.20307
9	1950001	2050000	0.219129
9	2000001	2100000	0.276334
9	2050001	2150000	0.369112
9	2100001	2200000	0.316636
9	6800001	6900000	0.192774
9	10750001	10850000	0.216645
9	10800001	10900000	0.226537
9	11200001	11300000	0.277164
9	11250001	11350000	0.205434
9	12400001	12500000	0.203573
9	13050001	13150000	0.196425
9	13100001	13200000	0.239443
9	13600001	13700000	0.210496
9	13750001	13850000	0.239162
9	13800001	13900000	0.235902
9	14600001	14700000	0.2969
9	14650001	14750000	0.391055
9	15700001	15800000	0.191319
9	16350001	16450000	0.193077
9	16400001	16500000	0.30102
9	16450001	16550000	0.228459
9	17000001	17100000	0.19057
9	17050001	17150000	0.213525
9	17450001	17550000	0.239085
9	17500001	17600000	0.306998
9	17600001	17700000	0.196483
9	17650001	17750000	0.342304
9	17700001	17800000	0.36247
9	17750001	17850000	0.27265
9	17800001	17900000	0.356727
9	17850001	17950000	0.415255
9	17900001	18000000	0.338914
9	17950001	18050000	0.330108
9	18000001	18100000	0.380125
9	18050001	18150000	0.343366
9	18100001	18200000	0.260627
9	18150001	18250000	0.22219
9	18200001	18300000	0.260762
9	18250001	18350000	0.271926
9	18300001	18400000	0.290953
9	18350001	18450000	0.321385
9	18400001	18500000	0.342661
9	18450001	18550000	0.307191
9	18600001	18700000	0.19626
9	18650001	18750000	0.204388
9	19550001	19650000	0.203834
9	19600001	19700000	0.294868
9	20650001	20750000	0.23933
9	20700001	20800000	0.193842
9	21050001	21150000	0.209021
9	21100001	21200000	0.360878
9	21150001	21250000	0.289306
9	21200001	21300000	0.294864
9	21250001	21350000	0.341461
9	21300001	21400000	0.256817
9	21650001	21750000	0.266956
9	21700001	21800000	0.198454
9	21850001	21950000	0.18572
9	21900001	22000000	0.228622
9	22000001	22100000	0.198025
9	22050001	22150000	0.193996
9	23050001	23150000	0.231616
9	23100001	23200000	0.35183
9	23400001	23500000	0.464408
9	23450001	23550000	0.655858
9	23500001	23600000	0.432669
9	26500001	26600000	0.214474
9	26650001	26750000	0.33215
9	26700001	26800000	0.331887
9	26750001	26850000	0.300984
9	26800001	26900000	0.273442
9	26950001	27050000	0.190288
9	27000001	27100000	0.20077
9	27050001	27150000	0.324774
9	28400001	28500000	0.226472
9	28450001	28550000	0.185931
9	29000001	29100000	0.195709
9	30000001	30100000	0.192108
9	30050001	30150000	0.266722
9	30100001	30200000	0.213749
9	30150001	30250000	0.190252
9	31250001	31350000	0.203543
9	31400001	31500000	0.221308
9	32200001	32300000	0.187339
9	32250001	32350000	0.381127
9	33550001	33650000	0.199483
9	33950001	34050000	0.227929
9	34000001	34100000	0.268075
9	37650001	37750000	0.213764
9	44650001	44750000	0.20633
9	55650001	55750000	0.276885
9	69550001	69650000	0.236337
9	69600001	69700000	0.230453
9	70050001	70150000	0.209648
9	78500001	78600000	0.227969
9	78550001	78650000	0.237758
9	78600001	78700000	0.221359
9	79550001	79650000	0.18745
9	79600001	79700000	0.205656
9	85450001	85550000	0.193458
9	85650001	85750000	0.311212
9	85700001	85800000	0.42982
9	85750001	85850000	0.390706
9	85800001	85900000	0.257467
9	95950001	96050000	0.222559
9	96000001	96100000	0.218178
9	96050001	96150000	0.193134
9	102250001	102350000	0.254887
9	102300001	102400000	0.247202
9	102400001	102500000	0.230373
9	102450001	102550000	0.208131
9	103950001	104050000	0.204027
9	104000001	104100000	0.222236
9	110050001	110150000	0.212626
9	110200001	110300000	0.210245
9	110450001	110550000	0.222488
9	110500001	110600000	0.219776
9	113850001	113950000	0.328067
9	113900001	114000000	0.340716
9	113950001	114050000	0.395505
9	114000001	114100000	0.343693
9	114050001	114150000	0.19628
9	137200001	137300000	0.219421
9	137850001	137950000	0.18808
9	138000001	138100000	0.189548
9	138050001	138150000	0.262417
9	138100001	138200000	0.211665
9	138350001	138450000	0.199752
9	138550001	138650000	0.195076
9	138750001	138850000	0.225604
9	138800001	138900000	0.19462
9	138850001	138950000	0.219959
9	138900001	139000000	0.247702
9	138950001	139050000	0.285783
9	139000001	139100000	0.307412
9	139050001	139150000	0.241613
9	139100001	139200000	0.217012
10	3300001	3400000	0.206027
10	3750001	3850000	0.185932
10	3900001	4000000	0.240035
10	3950001	4050000	0.31797
10	4000001	4100000	0.323802
10	4050001	4150000	0.285838
10	4100001	4200000	0.327543
10	4150001	4250000	0.427185
10	4200001	4300000	0.412652
10	4250001	4350000	0.317899
10	34800001	34900000	0.241285
10	34850001	34950000	0.210524
10	34950001	35050000	0.264645
10	35000001	35100000	0.286736
10	35050001	35150000	0.186185
10	59400001	59500000	0.293688
10	59450001	59550000	0.235367
10	65400001	65500000	0.192243
11	5450001	5550000	0.198102
11	15950001	16050000	0.241904
11	16000001	16100000	0.325354
11	30750001	30850000	0.263724
11	30800001	30900000	0.230884
11	32500001	32600000	0.246148
11	32550001	32650000	0.324768
11	32600001	32700000	0.248197
11	32650001	32750000	0.211221
11	32700001	32800000	0.290306
11	32750001	32850000	0.212556
11	32850001	32950000	0.225137
11	32900001	33000000	0.229982
11	32950001	33050000	0.230061
11	33000001	33100000	0.257366
11	41300001	41400000	0.24076
11	41350001	41450000	0.305973
11	43750001	43850000	0.187836
11	43800001	43900000	0.200871
11	43850001	43950000	0.259714
11	43900001	44000000	0.223331
11	43950001	44050000	0.227088
11	44000001	44100000	0.258792
11	44050001	44150000	0.327534
11	44100001	44200000	0.343343
11	44300001	44400000	0.215646
11	44350001	44450000	0.209428
11	44400001	44500000	0.199076
11	44700001	44800000	0.18825
11	44750001	44850000	0.22879
11	44800001	44900000	0.236481
11	44850001	44950000	0.229869
11	44900001	45000000	0.262001
11	44950001	45050000	0.241694
11	45250001	45350000	0.38779
11	45300001	45400000	0.283145
11	45550001	45650000	0.191492
11	46500001	46600000	0.198493
11	56500001	56600000	0.281555
11	60450001	60550000	0.205019
11	61400001	61500000	0.219845
11	61600001	61700000	0.297076
11	61650001	61750000	0.386781
11	61700001	61800000	0.225277
11	66300001	66400000	0.214264
11	66350001	66450000	0.210142
11	66500001	66600000	0.264251
11	66550001	66650000	0.264584
11	66650001	66750000	0.21992
11	66700001	66800000	0.460961
11	66750001	66850000	0.278504
11	66800001	66900000	0.214339
11	66850001	66950000	0.250392
11	67050001	67150000	0.248174
11	67400001	67500000	0.231588
11	67450001	67550000	0.210924
11	67500001	67600000	0.21804
11	67550001	67650000	0.353188
11	67600001	67700000	0.259504
11	68350001	68450000	0.312589
11	68400001	68500000	0.479285
11	68450001	68550000	0.409883
11	68500001	68600000	0.329963
11	68550001	68650000	0.319866
11	68600001	68700000	0.322127
11	68650001	68750000	0.252625
11	68700001	68800000	0.259922
11	68750001	68850000	0.32049
11	68800001	68900000	0.231766
11	69100001	69200000	0.191571
11	69150001	69250000	0.198467
11	69650001	69750000	0.200682
11	70050001	70150000	0.246453
11	70200001	70300000	0.239098
11	70250001	70350000	0.271114
11	70300001	70400000	0.32934
11	70350001	70450000	0.354844
11	70400001	70500000	0.196159
11	70600001	70700000	0.272946
11	70650001	70750000	0.246736
11	70700001	70800000	0.193958
11	70750001	70850000	0.246002
11	70800001	70900000	0.257258
11	70850001	70950000	0.278388
11	70900001	71000000	0.384114
11	70950001	71050000	0.261846
11	71050001	71150000	0.254269
11	71100001	71200000	0.319612
11	71250001	71350000	0.436191
11	71300001	71400000	0.431762
11	71350001	71450000	0.226198
11	71400001	71500000	0.193118
11	71450001	71550000	0.25855
11	71500001	71600000	0.226426
11	71650001	71750000	0.264014
11	71700001	71800000	0.223996
11	71750001	71850000	0.247098
11	71800001	71900000	0.344891
11	71850001	71950000	0.370504
11	71900001	72000000	0.366125
11	71950001	72050000	0.237244
11	72000001	72100000	0.227127
11	72050001	72150000	0.261896
11	72250001	72350000	0.454462
11	72300001	72400000	0.532078
11	72350001	72450000	0.467763
11	72400001	72500000	0.27269
11	72800001	72900000	0.28102
11	72850001	72950000	0.496999
11	72900001	73000000	0.344758
11	73150001	73250000	0.254391
11	73200001	73300000	0.325673
11	73250001	73350000	0.249827
11	73300001	73400000	0.213771
11	73550001	73650000	0.233726
11	73600001	73700000	0.239682
11	73650001	73750000	0.301655
11	73700001	73800000	0.42454
11	73750001	73850000	0.224015
11	74900001	75000000	0.216445
11	74950001	75050000	0.320791
11	75000001	75100000	0.306312
11	75050001	75150000	0.288142
12	300001	400000	0.24836
12	350001	450000	0.26309
12	400001	500000	0.211885
12	550001	650000	0.190467
12	600001	700000	0.201201
12	1650001	1750000	0.208473
12	1750001	1850000	0.186332
12	1800001	1900000	0.188299
12	1900001	2000000	0.206479
12	1950001	2050000	0.200158
12	14950001	15050000	0.217154
12	15000001	15100000	0.188
12	17250001	17350000	0.350524
12	17300001	17400000	0.314217
12	17350001	17450000	0.232513
12	26750001	26850000	0.203168
12	26800001	26900000	0.23583
12	26850001	26950000	0.243918
12	26900001	27000000	0.199364
12	27000001	27100000	0.324554
12	27050001	27150000	0.327867
12	27100001	27200000	0.237949
12	27150001	27250000	0.232176
12	27200001	27300000	0.19151
12	27250001	27350000	0.208109
12	27300001	27400000	0.290331
12	27500001	27600000	0.223993
12	27550001	27650000	0.26045
12	27600001	27700000	0.270357
12	27800001	27900000	0.190136
12	28550001	28650000	0.214829
12	29150001	29250000	0.280762
12	29200001	29300000	0.195342
12	30200001	30300000	0.222464
12	30950001	31050000	0.195697
12	31000001	31100000	0.22148
12	31200001	31300000	0.214122
12	31250001	31350000	0.388525
12	31300001	31400000	0.398955
12	31350001	31450000	0.379696
12	31400001	31500000	0.270208
12	31450001	31550000	0.22957
12	31500001	31600000	0.246805
12	31550001	31650000	0.222533
12	32650001	32750000	0.199428
12	32800001	32900000	0.190011
12	44350001	44450000	0.238495
12	44400001	44500000	0.234599
12	44450001	44550000	0.225646
12	44600001	44700000	0.22053
12	44850001	44950000	0.195289
12	44900001	45000000	0.199608
12	45100001	45200000	0.262843
12	45600001	45700000	0.316966
12	45650001	45750000	0.341126
12	56500001	56600000	0.203943
12	56550001	56650000	0.316682
12	56600001	56700000	0.287431
12	56650001	56750000	0.281608
12	56700001	56800000	0.346283
12	56750001	56850000	0.31378
12	56800001	56900000	0.234733
12	56850001	56950000	0.199008
12	57150001	57250000	0.207623
12	60150001	60250000	0.32849
12	60200001	60300000	0.395232
12	60250001	60350000	0.260085
12	60300001	60400000	0.283353
12	60350001	60450000	0.248949
12	60450001	60550000	0.254251
12	60500001	60600000	0.275641
12	60550001	60650000	0.321934
12	60800001	60900000	0.214905
12	60850001	60950000	0.23773
12	61100001	61200000	0.246906
12	61150001	61250000	0.246238
12	61200001	61300000	0.217836
12	61300001	61400000	0.255709
12	61350001	61450000	0.378504
12	61400001	61500000	0.303012
12	61450001	61550000	0.213333
12	61500001	61600000	0.205706
12	61550001	61650000	0.205706
13	3350001	3450000	0.214757
13	4000001	4100000	0.270063
13	6250001	6350000	0.248698
13	6300001	6400000	0.278709
13	6350001	6450000	0.254398
13	12900001	13000000	0.193073
13	12950001	13050000	0.202495
13	15250001	15350000	0.277562
13	15300001	15400000	0.317445
13	15450001	15550000	0.230527
13	16650001	16750000	0.225796
13	17350001	17450000	0.201239
13	17400001	17500000	0.18945
13	18350001	18450000	0.241221
13	18400001	18500000	0.243461
13	20150001	20250000	0.240984
13	20200001	20300000	0.325167
13	23450001	23550000	0.297828
13	23500001	23600000	0.273126
13	24150001	24250000	0.214983
13	24200001	24300000	0.31942
13	24250001	24350000	0.230537
13	24300001	24400000	0.190414
13	24500001	24600000	0.217702
13	25100001	25200000	0.20748
13	25150001	25250000	0.23139
13	25200001	25300000	0.274079
13	25250001	25350000	0.206314
13	25350001	25450000	0.203438
13	27300001	27400000	0.19684
13	27450001	27550000	0.268733
13	27500001	27600000	0.242794
13	27550001	27650000	0.349209
13	27600001	27700000	0.375296
13	27650001	27750000	0.255518
13	27700001	27800000	0.198926
13	27750001	27850000	0.209643
13	27800001	27900000	0.302665
13	27850001	27950000	0.502255
13	27900001	28000000	0.590854
13	27950001	28050000	0.564497
13	28000001	28100000	0.495327
13	28050001	28150000	0.35616
13	28100001	28200000	0.314494
13	28150001	28250000	0.427715
13	28200001	28300000	0.376737
13	28250001	28350000	0.286087
13	28300001	28400000	0.285204
13	28350001	28450000	0.244326
13	28400001	28500000	0.28455
13	28450001	28550000	0.36309
13	28500001	28600000	0.33935
13	28550001	28650000	0.231858
13	28600001	28700000	0.187474
13	28650001	28750000	0.232168
13	28700001	28800000	0.438445
13	28750001	28850000	0.517788
13	28800001	28900000	0.355267
13	28850001	28950000	0.257138
13	28900001	29000000	0.212157
13	32550001	32650000	0.186101
13	39050001	39150000	0.198395
13	39500001	39600000	0.214455
13	39550001	39650000	0.199459
13	39600001	39700000	0.223271
13	41050001	41150000	0.228642
13	41950001	42050000	0.223575
13	42000001	42100000	0.244069
13	42050001	42150000	0.224111
13	42100001	42200000	0.239198
13	42150001	42250000	0.239838
13	42200001	42300000	0.212207
13	42450001	42550000	0.314357
13	42500001	42600000	0.370169
13	42550001	42650000	0.29113
13	42600001	42700000	0.194089
13	42900001	43000000	0.244984
13	42950001	43050000	0.237054
13	43150001	43250000	0.195989
13	45050001	45150000	0.249777
13	45100001	45200000	0.226345
13	47000001	47100000	0.258941
13	47050001	47150000	0.206998
13	48150001	48250000	0.304826
13	48200001	48300000	0.209575
13	48250001	48350000	0.275902
13	48300001	48400000	0.380696
13	48350001	48450000	0.35505
13	48400001	48500000	0.233151
13	48450001	48550000	0.216518
13	48500001	48600000	0.247772
13	48550001	48650000	0.329346
13	48600001	48700000	0.198126
13	48800001	48900000	0.190399
13	49500001	49600000	0.232946
13	49550001	49650000	0.415673
13	49600001	49700000	0.447618
13	49650001	49750000	0.322699
13	50250001	50350000	0.222238
13	51200001	51300000	0.201318
13	51250001	51350000	0.244593
13	51400001	51500000	0.259328
13	51450001	51550000	0.479811
13	51500001	51600000	0.43376
13	51550001	51650000	0.370923
13	51600001	51700000	0.327179
13	51650001	51750000	0.274954
13	51700001	51800000	0.278293
13	51750001	51850000	0.262265
13	51800001	51900000	0.203042
13	51850001	51950000	0.194823
13	51900001	52000000	0.35546
13	51950001	52050000	0.410464
13	52000001	52100000	0.385156
13	52050001	52150000	0.348245
13	52100001	52200000	0.293482
13	52150001	52250000	0.221531
13	52200001	52300000	0.277045
13	52250001	52350000	0.274195
13	52300001	52400000	0.207828
13	52350001	52450000	0.281915
13	52400001	52500000	0.220026
13	52750001	52850000	0.332757
13	52800001	52900000	0.346591
13	52850001	52950000	0.193709
13	53050001	53150000	0.220934
13	53100001	53200000	0.33197
13	53150001	53250000	0.4103
13	53200001	53300000	0.35138
13	53250001	53350000	0.278875
13	53300001	53400000	0.289243
13	53350001	53450000	0.186403
13	53500001	53600000	0.345755
13	53550001	53650000	0.338054
13	53600001	53700000	0.238839
13	53650001	53750000	0.203664
13	53700001	53800000	0.242364
13	53750001	53850000	0.197675
13	53800001	53900000	0.200848
13	53850001	53950000	0.223908
13	53900001	54000000	0.344351
13	53950001	54050000	0.358402
13	54000001	54100000	0.220615
13	54050001	54150000	0.204887
13	54100001	54200000	0.304707
13	54150001	54250000	0.395401
13	54200001	54300000	0.212519
13	54400001	54500000	0.296188
13	54450001	54550000	0.285754
13	54500001	54600000	0.285355
13	54550001	54650000	0.27807
13	54600001	54700000	0.214669
13	54650001	54750000	0.269211
13	54700001	54800000	0.279259
13	54750001	54850000	0.22013
13	54800001	54900000	0.198782
13	54850001	54950000	0.268605
13	54900001	55000000	0.338011
13	54950001	55050000	0.329746
13	55000001	55100000	0.456791
13	55050001	55150000	0.478152
13	55100001	55200000	0.388486
13	55150001	55250000	0.317437
13	55300001	55400000	0.2002
13	55350001	55450000	0.27575
13	55400001	55500000	0.28049
13	55450001	55550000	0.248803
13	55600001	55700000	0.197955
13	55650001	55750000	0.299569
13	55700001	55800000	0.358787
13	55750001	55850000	0.338798
13	55800001	55900000	0.338306
13	55850001	55950000	0.341749
13	55900001	56000000	0.289723
13	55950001	56050000	0.198254
13	56400001	56500000	0.207567
13	56450001	56550000	0.193963
13	56750001	56850000	0.241112
13	56800001	56900000	0.226539
13	58000001	58100000	0.247649
13	58050001	58150000	0.202539
13	58100001	58200000	0.203416
13	58150001	58250000	0.271329
13	58200001	58300000	0.295888
13	58250001	58350000	0.327861
13	58300001	58400000	0.391431
13	58350001	58450000	0.410315
13	58400001	58500000	0.389297
13	58450001	58550000	0.247098
13	58600001	58700000	0.216462
13	58650001	58750000	0.233134
13	58700001	58800000	0.22433
13	58750001	58850000	0.220971
13	58800001	58900000	0.246715
13	59300001	59400000	0.206872
13	59550001	59650000	0.204276
13	59600001	59700000	0.212681
13	59700001	59800000	0.250622
13	59750001	59850000	0.278735
13	62550001	62650000	0.219205
13	62600001	62700000	0.241115
13	64150001	64250000	0.19067
13	64200001	64300000	0.207961
13	64250001	64350000	0.246982
13	64300001	64400000	0.27108
13	64600001	64700000	0.225562
13	64650001	64750000	0.239351
13	65400001	65500000	0.195798
13	65900001	66000000	0.211875
13	66000001	66100000	0.266758
13	66050001	66150000	0.343379
13	66100001	66200000	0.338115
13	66150001	66250000	0.291196
13	66200001	66300000	0.334319
13	66250001	66350000	0.332909
13	66650001	66750000	0.244859
13	66700001	66800000	0.370905
13	66750001	66850000	0.342896
13	66800001	66900000	0.301067
13	66850001	66950000	0.372042
13	66900001	67000000	0.290153
13	67200001	67300000	0.248861
13	67250001	67350000	0.262587
13	67300001	67400000	0.205743
13	67400001	67500000	0.220432
13	67550001	67650000	0.298731
13	67600001	67700000	0.343823
13	67650001	67750000	0.328875
13	67700001	67800000	0.419518
13	67750001	67850000	0.493517
13	67800001	67900000	0.405122
13	67850001	67950000	0.236459
13	68150001	68250000	0.203782
13	68200001	68300000	0.211507
13	68250001	68350000	0.243439
13	68300001	68400000	0.310076
13	68350001	68450000	0.289551
13	68400001	68500000	0.212461
13	68750001	68850000	0.212325
13	68800001	68900000	0.211661
13	68850001	68950000	0.224198
13	68900001	69000000	0.257651
13	68950001	69050000	0.338118
13	69000001	69100000	0.327675
13	69050001	69150000	0.28138
13	69100001	69200000	0.202295
13	69200001	69300000	0.259118
13	69250001	69350000	0.304562
13	69650001	69750000	0.235305
13	79500001	79600000	0.257917
13	79550001	79650000	0.286723
13	79600001	79700000	0.395406
13	79650001	79750000	0.362291
13	79850001	79950000	0.188039
13	93000001	93100000	0.262107
13	93050001	93150000	0.320383
13	93100001	93200000	0.282178
13	93150001	93250000	0.256259
13	93200001	93300000	0.211958
13	94650001	94750000	0.227149
13	94800001	94900000	0.206503
13	94850001	94950000	0.255282
13	99750001	99850000	0.226703
13	99800001	99900000	0.343545
13	99850001	99950000	0.385003
13	99900001	100000000	0.310106
13	99950001	100050000	0.215552
13	100000001	100100000	0.20454
13	103350001	103450000	0.203109
13	103400001	103500000	0.198681
13	108250001	108350000	0.263374
13	108300001	108400000	0.317294
13	108350001	108450000	0.372309
13	108400001	108500000	0.371163
13	108450001	108550000	0.311042
13	108500001	108600000	0.252977
13	108650001	108750000	0.232245
13	108700001	108800000	0.198345
13	112800001	112900000	0.239839
13	112850001	112950000	0.244683
13	113650001	113750000	0.212599
13	125950001	126050000	0.228938
13	126000001	126100000	0.238532
13	126050001	126150000	0.20093
13	134400001	134500000	0.30005
13	134450001	134550000	0.383928
13	134500001	134600000	0.331854
13	134550001	134650000	0.231414
13	134600001	134700000	0.245953
13	135850001	135950000	0.291223
13	135900001	136000000	0.341689
13	148950001	149050000	0.290177
13	149000001	149100000	0.288286
13	149050001	149150000	0.227125
13	149100001	149200000	0.194275
13	149250001	149350000	0.252273
13	149300001	149400000	0.243269
13	151750001	151850000	0.221432
13	151800001	151900000	0.199582
13	152500001	152600000	0.195934
13	152700001	152800000	0.207176
13	153550001	153650000	0.294468
13	153600001	153700000	0.394953
13	153650001	153750000	0.30948
13	154000001	154100000	0.188876
13	154050001	154150000	0.188477
13	154450001	154550000	0.195966
13	154500001	154600000	0.252118
13	155000001	155100000	0.189618
13	155050001	155150000	0.258175
13	155100001	155200000	0.291851
13	155150001	155250000	0.304453
13	155200001	155300000	0.223446
13	155250001	155350000	0.252592
13	155300001	155400000	0.299743
13	157450001	157550000	0.233876
13	157500001	157600000	0.251756
13	157550001	157650000	0.317543
13	157600001	157700000	0.374784
13	157650001	157750000	0.305358
13	159500001	159600000	0.202483
13	159800001	159900000	0.200682
13	165700001	165800000	0.188347
13	167250001	167350000	0.231552
13	168350001	168450000	0.231906
13	168400001	168500000	0.186939
13	170050001	170150000	0.206207
13	170100001	170200000	0.257336
13	170450001	170550000	0.234072
13	170500001	170600000	0.247479
13	170550001	170650000	0.192738
13	172100001	172200000	0.205848
13	172300001	172400000	0.198815
13	172350001	172450000	0.257883
13	172400001	172500000	0.249148
13	172450001	172550000	0.22844
13	172700001	172800000	0.193095
13	172750001	172850000	0.200284
13	173500001	173600000	0.217795
13	173550001	173650000	0.247516
13	173600001	173700000	0.223633
13	173650001	173750000	0.194641
13	173700001	173800000	0.220786
13	173750001	173850000	0.205931
13	174000001	174100000	0.285368
13	174050001	174150000	0.397616
13	174100001	174200000	0.424095
13	174150001	174250000	0.366626
13	174200001	174300000	0.32356
13	174250001	174350000	0.290721
13	174300001	174400000	0.311331
13	174350001	174450000	0.342505
13	174400001	174500000	0.312806
13	174450001	174550000	0.360818
13	174500001	174600000	0.352812
13	174550001	174650000	0.244395
13	174600001	174700000	0.198756
13	174650001	174750000	0.277791
13	174700001	174800000	0.235274
13	174800001	174900000	0.241924
13	174850001	174950000	0.305914
13	174900001	175000000	0.287178
13	174950001	175050000	0.251155
13	175200001	175300000	0.226563
13	175550001	175650000	0.216018
13	175600001	175700000	0.261307
13	175650001	175750000	0.283366
13	175700001	175800000	0.202083
13	175800001	175900000	0.226161
13	175850001	175950000	0.244103
13	175900001	176000000	0.245274
13	184650001	184750000	0.22036
13	184700001	184800000	0.210156
13	184850001	184950000	0.220545
13	184900001	185000000	0.251807
13	184950001	185050000	0.210131
13	185250001	185350000	0.345548
13	185300001	185400000	0.290745
13	186800001	186900000	0.276273
13	186850001	186950000	0.41475
13	186900001	187000000	0.277895
13	187550001	187650000	0.31521
13	188400001	188500000	0.233425
13	188750001	188850000	0.200616
13	188800001	188900000	0.223584
13	189400001	189500000	0.191437
13	200150001	200250000	0.204327
14	3850001	3950000	0.206458
14	5000001	5100000	0.21284
14	5050001	5150000	0.186248
14	5100001	5200000	0.217566
14	5150001	5250000	0.23396
14	7150001	7250000	0.260075
14	7200001	7300000	0.278991
14	7450001	7550000	0.21004
14	7500001	7600000	0.30088
14	7550001	7650000	0.227888
14	8450001	8550000	0.242907
14	8500001	8600000	0.196525
14	8550001	8650000	0.249748
14	8600001	8700000	0.279833
14	8650001	8750000	0.29943
14	8700001	8800000	0.252306
14	8750001	8850000	0.228969
14	8800001	8900000	0.232697
14	8850001	8950000	0.192075
14	8900001	9000000	0.199212
14	8950001	9050000	0.209959
14	9000001	9100000	0.190932
14	9050001	9150000	0.234042
14	9100001	9200000	0.219257
14	9400001	9500000	0.196014
14	10800001	10900000	0.192369
14	13200001	13300000	0.264949
14	15000001	15100000	0.198223
14	15050001	15150000	0.370026
14	15100001	15200000	0.346774
14	15150001	15250000	0.193684
14	23650001	23750000	0.216879
14	45250001	45350000	0.194381
14	46650001	46750000	0.196592
14	47300001	47400000	0.2322
14	47350001	47450000	0.309599
14	47400001	47500000	0.31366
14	47450001	47550000	0.281001
14	47950001	48050000	0.187389
14	48000001	48100000	0.269173
14	48050001	48150000	0.295315
14	48100001	48200000	0.330993
14	48150001	48250000	0.293452
14	48200001	48300000	0.31883
14	48250001	48350000	0.376411
14	48300001	48400000	0.360006
14	48350001	48450000	0.197823
14	48600001	48700000	0.196865
14	48650001	48750000	0.189037
14	49100001	49200000	0.230761
14	49150001	49250000	0.283303
14	49200001	49300000	0.210651
14	49250001	49350000	0.188807
14	50150001	50250000	0.243342
14	50200001	50300000	0.208114
14	50300001	50400000	0.270113
14	50350001	50450000	0.297659
14	50400001	50500000	0.205103
14	51500001	51600000	0.253587
14	51550001	51650000	0.240025
14	53450001	53550000	0.228248
14	53500001	53600000	0.245438
14	53600001	53700000	0.213655
14	53650001	53750000	0.203924
14	54100001	54200000	0.210523
14	54950001	55050000	0.238272
14	55000001	55100000	0.259843
14	55050001	55150000	0.274746
14	55100001	55200000	0.192482
14	60200001	60300000	0.237996
14	60250001	60350000	0.195819
14	60750001	60850000	0.218907
14	60800001	60900000	0.250231
14	60850001	60950000	0.22026
14	60900001	61000000	0.189585
14	60950001	61050000	0.193634
14	61150001	61250000	0.221909
14	61300001	61400000	0.267912
14	61350001	61450000	0.264169
14	62200001	62300000	0.234698
14	65650001	65750000	0.236054
14	65700001	65800000	0.256873
14	65750001	65850000	0.320857
14	65800001	65900000	0.267243
14	67650001	67750000	0.230748
14	68100001	68200000	0.2081
14	68150001	68250000	0.320009
14	68200001	68300000	0.278514
14	68250001	68350000	0.200981
14	77100001	77200000	0.229319
14	77150001	77250000	0.200328
14	77550001	77650000	0.292563
14	77600001	77700000	0.277192
14	77750001	77850000	0.279828
14	77800001	77900000	0.27628
14	78500001	78600000	0.234509
14	78550001	78650000	0.217556
14	78750001	78850000	0.187553
14	79350001	79450000	0.254875
14	79400001	79500000	0.228953
14	82050001	82150000	0.29382
14	82100001	82200000	0.388841
14	82150001	82250000	0.440204
14	82200001	82300000	0.350087
14	83400001	83500000	0.195452
14	84450001	84550000	0.203879
14	84500001	84600000	0.230307
14	90950001	91050000	0.257477
14	95800001	95900000	0.209649
14	95850001	95950000	0.325027
14	95900001	96000000	0.210028
14	101850001	101950000	0.196518
14	101900001	102000000	0.224383
14	109450001	109550000	0.207487
14	109500001	109600000	0.298505
14	109550001	109650000	0.337145
14	109600001	109700000	0.230544
14	110850001	110950000	0.23245
14	116400001	116500000	0.230038
14	116450001	116550000	0.240234
14	116800001	116900000	0.200407
14	116850001	116950000	0.248016
14	121200001	121300000	0.218353
14	121250001	121350000	0.276233
14	121300001	121400000	0.264237
14	121350001	121450000	0.232123
14	121750001	121850000	0.231728
14	121800001	121900000	0.292931
14	121850001	121950000	0.331108
14	121900001	122000000	0.304783
14	127800001	127900000	0.209636
14	127850001	127950000	0.193034
14	127900001	128000000	0.255766
14	127950001	128050000	0.251084
14	132050001	132150000	0.205792
14	132100001	132200000	0.187901
14	132150001	132250000	0.195492
14	132350001	132450000	0.290996
14	132400001	132500000	0.316368
14	137950001	138050000	0.251164
14	138000001	138100000	0.187385
14	138700001	138800000	0.192096
15	4550001	4650000	0.250426
15	7250001	7350000	0.198776
15	7400001	7500000	0.265303
15	7450001	7550000	0.221432
15	7850001	7950000	0.205546
15	16850001	16950000	0.209176
15	16900001	17000000	0.216302
15	17150001	17250000	0.338736
15	17200001	17300000	0.248001
15	19800001	19900000	0.251937
15	19850001	19950000	0.187171
15	75050001	75150000	0.197176
15	75100001	75200000	0.21204
15	75600001	75700000	0.192275
15	81900001	82000000	0.218252
15	88300001	88400000	0.292308
15	88350001	88450000	0.289077
15	88400001	88500000	0.30234
15	88450001	88550000	0.291628
15	88500001	88600000	0.236889
15	88850001	88950000	0.229537
15	88900001	89000000	0.214638
15	88950001	89050000	0.18786
15	89000001	89100000	0.291392
15	89050001	89150000	0.300856
15	89450001	89550000	0.248458
15	89500001	89600000	0.240898
[truncated: 266 more rows]

## Sheet: Table S4
Table S4. Candidate regions identified by more than two methods
Chr	Start	End	Method
6	54350001	54450000	WEIGHTED_Fst、θπ ratio、 XP-EHH
6	54400001	54500000	WEIGHTED_Fst、θπ ratio、 XP-EHH
6	54450001	54550000	WEIGHTED_Fst、θπ ratio、 XP-EHH
6	54500001	54600000	WEIGHTED_Fst、θπ ratio、 XP-EHH
6	54550001	54650000	WEIGHTED_Fst、θπ ratio、 XP-EHH
6	54600001	54700000	WEIGHTED_Fst、θπ ratio、 XP-EHH
8	53700001	53800000	WEIGHTED_Fst、θπ ratio、 XP-EHH
8	53750001	53850000	WEIGHTED_Fst、θπ ratio、 XP-EHH
8	55100001	55200000	WEIGHTED_Fst、θπ ratio、 XP-EHH
8	55150001	55250000	WEIGHTED_Fst、θπ ratio、 XP-EHH
8	55200001	55300000	WEIGHTED_Fst、θπ ratio、 XP-EHH
8	64900001	65000000	WEIGHTED_Fst、θπ ratio、 XP-EHH
8	64950001	65050000	WEIGHTED_Fst、θπ ratio、 XP-EHH
8	65000001	65100000	WEIGHTED_Fst、θπ ratio、 XP-EHH
8	66650001	66750000	WEIGHTED_Fst、θπ ratio、 XP-EHH
8	66850001	66950000	WEIGHTED_Fst、θπ ratio、 XP-EHH
8	66900001	67000000	WEIGHTED_Fst、θπ ratio、 XP-EHH
8	66950001	67050000	WEIGHTED_Fst、θπ ratio、 XP-EHH
8	67000001	67100000	WEIGHTED_Fst、θπ ratio、 XP-EHH
8	67050001	67150000	WEIGHTED_Fst、θπ ratio、 XP-EHH
8	67100001	67200000	WEIGHTED_Fst、θπ ratio、 XP-EHH
8	67200001	67300000	WEIGHTED_Fst、θπ ratio、 XP-EHH
8	67250001	67350000	WEIGHTED_Fst、θπ ratio、 XP-EHH
8	67300001	67400000	WEIGHTED_Fst、θπ ratio、 XP-EHH
8	67350001	67450000	WEIGHTED_Fst、θπ ratio、 XP-EHH
8	67450001	67550000	WEIGHTED_Fst、θπ ratio、 XP-EHH
8	67550001	67650000	WEIGHTED_Fst、θπ ratio、 XP-EHH
8	78950001	79050000	WEIGHTED_Fst、θπ ratio、 XP-EHH
8	79000001	79100000	WEIGHTED_Fst、θπ ratio、 XP-EHH
8	79050001	79150000	WEIGHTED_Fst、θπ ratio、 XP-EHH
8	79300001	79400000	WEIGHTED_Fst、θπ ratio、 XP-EHH
8	79350001	79450000	WEIGHTED_Fst、θπ ratio、 XP-EHH
8	79450001	79550000	WEIGHTED_Fst、θπ ratio、 XP-EHH
13	134450001	134550000	WEIGHTED_Fst、θπ ratio、 XP-EHH
13	134500001	134600000	WEIGHTED_Fst、θπ ratio、 XP-EHH
14	110850001	110950000	WEIGHTED_Fst、θπ ratio、 XP-EHH
6	93350001	93450000	WEIGHTED_Fst、XP-EHH
6	93400001	93500000	WEIGHTED_Fst、XP-EHH
7	48700001	48800000	WEIGHTED_Fst、XP-EHH
8	64850001	64950000	WEIGHTED_Fst、XP-EHH
8	66800001	66900000	WEIGHTED_Fst、XP-EHH
8	67150001	67250000	WEIGHTED_Fst、XP-EHH
8	79200001	79300000	WEIGHTED_Fst、XP-EHH
8	79250001	79350000	WEIGHTED_Fst、XP-EHH
2	1250001	1350000	WEIGHTED_Fst、θπ ratio
2	1300001	1400000	WEIGHTED_Fst、θπ ratio
6	53200001	53300000	WEIGHTED_Fst、θπ ratio
6	54250001	54350000	WEIGHTED_Fst、θπ ratio
6	54300001	54400000	WEIGHTED_Fst、θπ ratio
6	85050001	85150000	WEIGHTED_Fst、θπ ratio
6	85100001	85200000	WEIGHTED_Fst、θπ ratio
8	39050001	39150000	WEIGHTED_Fst、θπ ratio
8	45050001	45150000	WEIGHTED_Fst、θπ ratio
8	45100001	45200000	WEIGHTED_Fst、θπ ratio
8	48300001	48400000	WEIGHTED_Fst、θπ ratio
8	51900001	52000000	WEIGHTED_Fst、θπ ratio
8	53800001	53900000	WEIGHTED_Fst、θπ ratio
8	55250001	55350000	WEIGHTED_Fst、θπ ratio
8	55300001	55400000	WEIGHTED_Fst、θπ ratio
8	65400001	65500000	WEIGHTED_Fst、θπ ratio
8	65450001	65550000	WEIGHTED_Fst、θπ ratio
8	66550001	66650000	WEIGHTED_Fst、θπ ratio
8	66600001	66700000	WEIGHTED_Fst、θπ ratio
8	67600001	67700000	WEIGHTED_Fst、θπ ratio
8	67850001	67950000	WEIGHTED_Fst、θπ ratio
8	67900001	68000000	WEIGHTED_Fst、θπ ratio
8	67950001	68050000	WEIGHTED_Fst、θπ ratio
8	68000001	68100000	WEIGHTED_Fst、θπ ratio
8	68200001	68300000	WEIGHTED_Fst、θπ ratio
8	68250001	68350000	WEIGHTED_Fst、θπ ratio
8	69200001	69300000	WEIGHTED_Fst、θπ ratio
8	69250001	69350000	WEIGHTED_Fst、θπ ratio
8	69300001	69400000	WEIGHTED_Fst、θπ ratio
8	69350001	69450000	WEIGHTED_Fst、θπ ratio
8	69400001	69500000	WEIGHTED_Fst、θπ ratio
8	69450001	69550000	WEIGHTED_Fst、θπ ratio
8	71050001	71150000	WEIGHTED_Fst、θπ ratio
8	78900001	79000000	WEIGHTED_Fst、θπ ratio
12	14500001	14600000	WEIGHTED_Fst、θπ ratio
1	1450001	1550000	θπ ratio、 XP-EHH
1	1700001	1800000	θπ ratio、 XP-EHH
1	25450001	25550000	θπ ratio、 XP-EHH
1	28450001	28550000	θπ ratio、 XP-EHH
1	42500001	42600000	θπ ratio、 XP-EHH
1	47300001	47400000	θπ ratio、 XP-EHH
1	47350001	47450000	θπ ratio、 XP-EHH
1	47400001	47500000	θπ ratio、 XP-EHH
1	47450001	47550000	θπ ratio、 XP-EHH
1	47500001	47600000	θπ ratio、 XP-EHH
1	47550001	47650000	θπ ratio、 XP-EHH
1	47600001	47700000	θπ ratio、 XP-EHH
1	47650001	47750000	θπ ratio、 XP-EHH
1	47950001	48050000	θπ ratio、 XP-EHH
1	48400001	48500000	θπ ratio、 XP-EHH
1	52300001	52400000	θπ ratio、 XP-EHH
1	52350001	52450000	θπ ratio、 XP-EHH
1	95600001	95700000	θπ ratio、 XP-EHH
1	266850001	266950000	θπ ratio、 XP-EHH
1	266900001	267000000	θπ ratio、 XP-EHH
2	12800001	12900000	θπ ratio、 XP-EHH
2	12900001	13000000	θπ ratio、 XP-EHH
2	23450001	23550000	θπ ratio、 XP-EHH
2	23500001	23600000	θπ ratio、 XP-EHH
2	23550001	23650000	θπ ratio、 XP-EHH
2	30800001	30900000	θπ ratio、 XP-EHH
2	34550001	34650000	θπ ratio、 XP-EHH
2	41900001	42000000	θπ ratio、 XP-EHH
2	43450001	43550000	θπ ratio、 XP-EHH
2	43500001	43600000	θπ ratio、 XP-EHH
2	114200001	114300000	θπ ratio、 XP-EHH
2	115000001	115100000	θπ ratio、 XP-EHH
2	119350001	119450000	θπ ratio、 XP-EHH
3	13850001	13950000	θπ ratio、 XP-EHH
3	13950001	14050000	θπ ratio、 XP-EHH
3	14000001	14100000	θπ ratio、 XP-EHH
3	14050001	14150000	θπ ratio、 XP-EHH
3	14100001	14200000	θπ ratio、 XP-EHH
3	14150001	14250000	θπ ratio、 XP-EHH
3	14200001	14300000	θπ ratio、 XP-EHH
3	20050001	20150000	θπ ratio、 XP-EHH
3	20100001	20200000	θπ ratio、 XP-EHH
3	20150001	20250000	θπ ratio、 XP-EHH
3	20200001	20300000	θπ ratio、 XP-EHH
3	20250001	20350000	θπ ratio、 XP-EHH
3	27650001	27750000	θπ ratio、 XP-EHH
3	27700001	27800000	θπ ratio、 XP-EHH
3	29050001	29150000	θπ ratio、 XP-EHH
3	29100001	29200000	θπ ratio、 XP-EHH
3	106800001	106900000	θπ ratio、 XP-EHH
3	129400001	129500000	θπ ratio、 XP-EHH
3	129450001	129550000	θπ ratio、 XP-EHH
3	129700001	129800000	θπ ratio、 XP-EHH
3	129850001	129950000	θπ ratio、 XP-EHH
3	130000001	130100000	θπ ratio、 XP-EHH
3	130050001	130150000	θπ ratio、 XP-EHH
3	130250001	130350000	θπ ratio、 XP-EHH
3	130300001	130400000	θπ ratio、 XP-EHH
3	130350001	130450000	θπ ratio、 XP-EHH
3	130400001	130500000	θπ ratio、 XP-EHH
3	130450001	130550000	θπ ratio、 XP-EHH
4	12150001	12250000	θπ ratio、 XP-EHH
4	12550001	12650000	θπ ratio、 XP-EHH
4	12600001	12700000	θπ ratio、 XP-EHH
4	12650001	12750000	θπ ratio、 XP-EHH
4	12700001	12800000	θπ ratio、 XP-EHH
4	12750001	12850000	θπ ratio、 XP-EHH
4	13150001	13250000	θπ ratio、 XP-EHH
4	13400001	13500000	θπ ratio、 XP-EHH
4	13450001	13550000	θπ ratio、 XP-EHH
4	46550001	46650000	θπ ratio、 XP-EHH
4	46600001	46700000	θπ ratio、 XP-EHH
4	60000001	60100000	θπ ratio、 XP-EHH
4	89950001	90050000	θπ ratio、 XP-EHH
4	113350001	113450000	θπ ratio、 XP-EHH
4	113400001	113500000	θπ ratio、 XP-EHH
4	113450001	113550000	θπ ratio、 XP-EHH
4	113500001	113600000	θπ ratio、 XP-EHH
4	114350001	114450000	θπ ratio、 XP-EHH
4	114400001	114500000	θπ ratio、 XP-EHH
4	114450001	114550000	θπ ratio、 XP-EHH
4	120200001	120300000	θπ ratio、 XP-EHH
4	129700001	129800000	θπ ratio、 XP-EHH
5	14650001	14750000	θπ ratio、 XP-EHH
5	15050001	15150000	θπ ratio、 XP-EHH
5	15100001	15200000	θπ ratio、 XP-EHH
5	15700001	15800000	θπ ratio、 XP-EHH
5	16050001	16150000	θπ ratio、 XP-EHH
5	16100001	16200000	θπ ratio、 XP-EHH
5	16150001	16250000	θπ ratio、 XP-EHH
5	16200001	16300000	θπ ratio、 XP-EHH
5	16300001	16400000	θπ ratio、 XP-EHH
5	16350001	16450000	θπ ratio、 XP-EHH
5	16750001	16850000	θπ ratio、 XP-EHH
5	17100001	17200000	θπ ratio、 XP-EHH
5	18350001	18450000	θπ ratio、 XP-EHH
5	18400001	18500000	θπ ratio、 XP-EHH
5	23300001	23400000	θπ ratio、 XP-EHH
5	23700001	23800000	θπ ratio、 XP-EHH
5	23750001	23850000	θπ ratio、 XP-EHH
5	23900001	24000000	θπ ratio、 XP-EHH
5	23950001	24050000	θπ ratio、 XP-EHH
5	24550001	24650000	θπ ratio、 XP-EHH
5	25050001	25150000	θπ ratio、 XP-EHH
5	25100001	25200000	θπ ratio、 XP-EHH
5	25150001	25250000	θπ ratio、 XP-EHH
5	25200001	25300000	θπ ratio、 XP-EHH
5	25800001	25900000	θπ ratio、 XP-EHH
5	25850001	25950000	θπ ratio、 XP-EHH
5	25900001	26000000	θπ ratio、 XP-EHH
5	25950001	26050000	θπ ratio、 XP-EHH
5	26350001	26450000	θπ ratio、 XP-EHH
5	26650001	26750000	θπ ratio、 XP-EHH
5	26700001	26800000	θπ ratio、 XP-EHH
5	26750001	26850000	θπ ratio、 XP-EHH
5	27000001	27100000	θπ ratio、 XP-EHH
5	27050001	27150000	θπ ratio、 XP-EHH
5	27100001	27200000	θπ ratio、 XP-EHH
5	27250001	27350000	θπ ratio、 XP-EHH
5	27300001	27400000	θπ ratio、 XP-EHH
5	29100001	29200000	θπ ratio、 XP-EHH
5	61100001	61200000	θπ ratio、 XP-EHH
5	61150001	61250000	θπ ratio、 XP-EHH
5	61200001	61300000	θπ ratio、 XP-EHH
5	61250001	61350000	θπ ratio、 XP-EHH
5	61350001	61450000	θπ ratio、 XP-EHH
5	69050001	69150000	θπ ratio、 XP-EHH
5	69800001	69900000	θπ ratio、 XP-EHH
5	70550001	70650000	θπ ratio、 XP-EHH
5	72250001	72350000	θπ ratio、 XP-EHH
5	72800001	72900000	θπ ratio、 XP-EHH
5	72950001	73050000	θπ ratio、 XP-EHH
5	73850001	73950000	θπ ratio、 XP-EHH
5	73900001	74000000	θπ ratio、 XP-EHH
5	91150001	91250000	θπ ratio、 XP-EHH
5	91200001	91300000	θπ ratio、 XP-EHH
5	91500001	91600000	θπ ratio、 XP-EHH
5	91550001	91650000	θπ ratio、 XP-EHH
5	91600001	91700000	θπ ratio、 XP-EHH
5	92600001	92700000	θπ ratio、 XP-EHH
5	92650001	92750000	θπ ratio、 XP-EHH
5	92700001	92800000	θπ ratio、 XP-EHH
5	92750001	92850000	θπ ratio、 XP-EHH
5	92800001	92900000	θπ ratio、 XP-EHH
5	92850001	92950000	θπ ratio、 XP-EHH
5	92950001	93050000	θπ ratio、 XP-EHH
5	93000001	93100000	θπ ratio、 XP-EHH
5	100400001	100500000	θπ ratio、 XP-EHH
5	101900001	102000000	θπ ratio、 XP-EHH
5	102050001	102150000	θπ ratio、 XP-EHH
5	102100001	102200000	θπ ratio、 XP-EHH
5	102150001	102250000	θπ ratio、 XP-EHH
5	102200001	102300000	θπ ratio、 XP-EHH
5	102250001	102350000	θπ ratio、 XP-EHH
6	5200001	5300000	θπ ratio、 XP-EHH
6	5500001	5600000	θπ ratio、 XP-EHH
6	5550001	5650000	θπ ratio、 XP-EHH
6	19250001	19350000	θπ ratio、 XP-EHH
6	19300001	19400000	θπ ratio、 XP-EHH
6	47950001	48050000	θπ ratio、 XP-EHH
6	48100001	48200000	θπ ratio、 XP-EHH
6	54650001	54750000	θπ ratio、 XP-EHH
6	59850001	59950000	θπ ratio、 XP-EHH
6	60050001	60150000	θπ ratio、 XP-EHH
6	60100001	60200000	θπ ratio、 XP-EHH
6	60150001	60250000	θπ ratio、 XP-EHH
6	60200001	60300000	θπ ratio、 XP-EHH
6	60250001	60350000	θπ ratio、 XP-EHH
6	60300001	60400000	θπ ratio、 XP-EHH
6	60350001	60450000	θπ ratio、 XP-EHH
6	60400001	60500000	θπ ratio、 XP-EHH
6	60450001	60550000	θπ ratio、 XP-EHH
6	60500001	60600000	θπ ratio、 XP-EHH
6	60550001	60650000	θπ ratio、 XP-EHH
6	60600001	60700000	θπ ratio、 XP-EHH
6	60650001	60750000	θπ ratio、 XP-EHH
6	60700001	60800000	θπ ratio、 XP-EHH
6	60750001	60850000	θπ ratio、 XP-EHH
6	60800001	60900000	θπ ratio、 XP-EHH
6	60850001	60950000	θπ ratio、 XP-EHH
6	60900001	61000000	θπ ratio、 XP-EHH
6	60950001	61050000	θπ ratio、 XP-EHH
6	61000001	61100000	θπ ratio、 XP-EHH
6	61050001	61150000	θπ ratio、 XP-EHH
6	61100001	61200000	θπ ratio、 XP-EHH
6	61150001	61250000	θπ ratio、 XP-EHH
6	61200001	61300000	θπ ratio、 XP-EHH
6	61250001	61350000	θπ ratio、 XP-EHH
6	61300001	61400000	θπ ratio、 XP-EHH
6	61350001	61450000	θπ ratio、 XP-EHH
6	61400001	61500000	θπ ratio、 XP-EHH
6	61450001	61550000	θπ ratio、 XP-EHH
6	63300001	63400000	θπ ratio、 XP-EHH
6	63650001	63750000	θπ ratio、 XP-EHH
6	64200001	64300000	θπ ratio、 XP-EHH
6	64750001	64850000	θπ ratio、 XP-EHH
6	65550001	65650000	θπ ratio、 XP-EHH
6	68800001	68900000	θπ ratio、 XP-EHH
6	69000001	69100000	θπ ratio、 XP-EHH
6	69050001	69150000	θπ ratio、 XP-EHH
6	69100001	69200000	θπ ratio、 XP-EHH
6	69150001	69250000	θπ ratio、 XP-EHH
6	69200001	69300000	θπ ratio、 XP-EHH
6	69250001	69350000	θπ ratio、 XP-EHH
6	71550001	71650000	θπ ratio、 XP-EHH
6	76150001	76250000	θπ ratio、 XP-EHH
6	77400001	77500000	θπ ratio、 XP-EHH
6	77450001	77550000	θπ ratio、 XP-EHH
6	77750001	77850000	θπ ratio、 XP-EHH
6	77800001	77900000	θπ ratio、 XP-EHH
6	77850001	77950000	θπ ratio、 XP-EHH
6	78000001	78100000	θπ ratio、 XP-EHH
6	78150001	78250000	θπ ratio、 XP-EHH
6	78750001	78850000	θπ ratio、 XP-EHH
6	78800001	78900000	θπ ratio、 XP-EHH
6	78850001	78950000	θπ ratio、 XP-EHH
6	78900001	79000000	θπ ratio、 XP-EHH
6	78950001	79050000	θπ ratio、 XP-EHH
6	79000001	79100000	θπ ratio、 XP-EHH
6	79050001	79150000	θπ ratio、 XP-EHH
6	79100001	79200000	θπ ratio、 XP-EHH
6	79200001	79300000	θπ ratio、 XP-EHH
6	79250001	79350000	θπ ratio、 XP-EHH
6	79300001	79400000	θπ ratio、 XP-EHH
6	79350001	79450000	θπ ratio、 XP-EHH
6	79600001	79700000	θπ ratio、 XP-EHH
6	79700001	79800000	θπ ratio、 XP-EHH
6	80050001	80150000	θπ ratio、 XP-EHH
6	80150001	80250000	θπ ratio、 XP-EHH
6	80200001	80300000	θπ ratio、 XP-EHH
6	80500001	80600000	θπ ratio、 XP-EHH
6	80550001	80650000	θπ ratio、 XP-EHH
6	80600001	80700000	θπ ratio、 XP-EHH
6	80650001	80750000	θπ ratio、 XP-EHH
6	80950001	81050000	θπ ratio、 XP-EHH
6	81000001	81100000	θπ ratio、 XP-EHH
6	81200001	81300000	θπ ratio、 XP-EHH
6	81400001	81500000	θπ ratio、 XP-EHH
6	81550001	81650000	θπ ratio、 XP-EHH
6	81600001	81700000	θπ ratio、 XP-EHH
6	81650001	81750000	θπ ratio、 XP-EHH
6	81850001	81950000	θπ ratio、 XP-EHH
6	81900001	82000000	θπ ratio、 XP-EHH
6	82000001	82100000	θπ ratio、 XP-EHH
6	82150001	82250000	θπ ratio、 XP-EHH
6	82200001	82300000	θπ ratio、 XP-EHH
6	82250001	82350000	θπ ratio、 XP-EHH
6	86750001	86850000	θπ ratio、 XP-EHH
6	90500001	90600000	θπ ratio、 XP-EHH
6	96200001	96300000	θπ ratio、 XP-EHH
6	96250001	96350000	θπ ratio、 XP-EHH
6	96300001	96400000	θπ ratio、 XP-EHH
6	96350001	96450000	θπ ratio、 XP-EHH
6	96750001	96850000	θπ ratio、 XP-EHH
6	96800001	96900000	θπ ratio、 XP-EHH
6	96850001	96950000	θπ ratio、 XP-EHH
6	96900001	97000000	θπ ratio、 XP-EHH
6	96950001	97050000	θπ ratio、 XP-EHH
6	97900001	98000000	θπ ratio、 XP-EHH
6	99000001	99100000	θπ ratio、 XP-EHH
6	104950001	105050000	θπ ratio、 XP-EHH
6	105000001	105100000	θπ ratio、 XP-EHH
6	105050001	105150000	θπ ratio、 XP-EHH
6	105100001	105200000	θπ ratio、 XP-EHH
6	105150001	105250000	θπ ratio、 XP-EHH
6	105200001	105300000	θπ ratio、 XP-EHH
6	105250001	105350000	θπ ratio、 XP-EHH
6	127200001	127300000	θπ ratio、 XP-EHH
6	130100001	130200000	θπ ratio、 XP-EHH
6	130400001	130500000	θπ ratio、 XP-EHH
6	130450001	130550000	θπ ratio、 XP-EHH
6	130500001	130600000	θπ ratio、 XP-EHH
6	130550001	130650000	θπ ratio、 XP-EHH
6	130600001	130700000	θπ ratio、 XP-EHH
6	130650001	130750000	θπ ratio、 XP-EHH
6	130700001	130800000	θπ ratio、 XP-EHH
6	130750001	130850000	θπ ratio、 XP-EHH
6	132350001	132450000	θπ ratio、 XP-EHH
6	132400001	132500000	θπ ratio、 XP-EHH
6	132450001	132550000	θπ ratio、 XP-EHH
6	132500001	132600000	θπ ratio、 XP-EHH
6	132550001	132650000	θπ ratio、 XP-EHH
6	132600001	132700000	θπ ratio、 XP-EHH
6	139600001	139700000	θπ ratio、 XP-EHH
6	139650001	139750000	θπ ratio、 XP-EHH
6	141950001	142050000	θπ ratio、 XP-EHH
6	149500001	149600000	θπ ratio、 XP-EHH
6	158350001	158450000	θπ ratio、 XP-EHH
6	158400001	158500000	θπ ratio、 XP-EHH
6	158800001	158900000	θπ ratio、 XP-EHH
7	13550001	13650000	θπ ratio、 XP-EHH
7	13600001	13700000	θπ ratio、 XP-EHH
7	15400001	15500000	θπ ratio、 XP-EHH
7	15600001	15700000	θπ ratio、 XP-EHH
7	15650001	15750000	θπ ratio、 XP-EHH
7	15750001	15850000	θπ ratio、 XP-EHH
7	16550001	16650000	θπ ratio、 XP-EHH
7	16650001	16750000	θπ ratio、 XP-EHH
7	16700001	16800000	θπ ratio、 XP-EHH
7	16750001	16850000	θπ ratio、 XP-EHH
7	17250001	17350000	θπ ratio、 XP-EHH
7	19500001	19600000	θπ ratio、 XP-EHH
7	22100001	22200000	θπ ratio、 XP-EHH
7	22300001	22400000	θπ ratio、 XP-EHH
7	32050001	32150000	θπ ratio、 XP-EHH
7	32100001	32200000	θπ ratio、 XP-EHH
7	32150001	32250000	θπ ratio、 XP-EHH
7	32200001	32300000	θπ ratio、 XP-EHH
7	32350001	32450000	θπ ratio、 XP-EHH
7	45450001	45550000	θπ ratio、 XP-EHH
7	47500001	47600000	θπ ratio、 XP-EHH
7	47900001	48000000	θπ ratio、 XP-EHH
7	47950001	48050000	θπ ratio、 XP-EHH
7	48050001	48150000	θπ ratio、 XP-EHH
7	48100001	48200000	θπ ratio、 XP-EHH
7	48600001	48700000	θπ ratio、 XP-EHH
7	48650001	48750000	θπ ratio、 XP-EHH
7	85350001	85450000	θπ ratio、 XP-EHH
7	85600001	85700000	θπ ratio、 XP-EHH
7	85650001	85750000	θπ ratio、 XP-EHH
7	85700001	85800000	θπ ratio、 XP-EHH
7	86250001	86350000	θπ ratio、 XP-EHH
7	86850001	86950000	θπ ratio、 XP-EHH
7	86900001	87000000	θπ ratio、 XP-EHH
7	86950001	87050000	θπ ratio、 XP-EHH
7	87200001	87300000	θπ ratio、 XP-EHH
7	87250001	87350000	θπ ratio、 XP-EHH
7	87450001	87550000	θπ ratio、 XP-EHH
7	87500001	87600000	θπ ratio、 XP-EHH
7	87550001	87650000	θπ ratio、 XP-EHH
7	87600001	87700000	θπ ratio、 XP-EHH
7	87750001	87850000	θπ ratio、 XP-EHH
7	88050001	88150000	θπ ratio、 XP-EHH
7	88100001	88200000	θπ ratio、 XP-EHH
7	88150001	88250000	θπ ratio、 XP-EHH
7	91150001	91250000	θπ ratio、 XP-EHH
7	92400001	92500000	θπ ratio、 XP-EHH
7	93250001	93350000	θπ ratio、 XP-EHH
7	93300001	93400000	θπ ratio、 XP-EHH
7	93650001	93750000	θπ ratio、 XP-EHH
7	93800001	93900000	θπ ratio、 XP-EHH
7	93850001	93950000	θπ ratio、 XP-EHH
7	93900001	94000000	θπ ratio、 XP-EHH
7	93950001	94050000	θπ ratio、 XP-EHH
7	94000001	94100000	θπ ratio、 XP-EHH
7	94050001	94150000	θπ ratio、 XP-EHH
7	94100001	94200000	θπ ratio、 XP-EHH
7	94150001	94250000	θπ ratio、 XP-EHH
7	95100001	95200000	θπ ratio、 XP-EHH
7	112250001	112350000	θπ ratio、 XP-EHH
7	112300001	112400000	θπ ratio、 XP-EHH
7	113250001	113350000	θπ ratio、 XP-EHH
7	113950001	114050000	θπ ratio、 XP-EHH
7	114000001	114100000	θπ ratio、 XP-EHH
7	114050001	114150000	θπ ratio、 XP-EHH
7	114100001	114200000	θπ ratio、 XP-EHH
7	114550001	114650000	θπ ratio、 XP-EHH
7	114600001	114700000	θπ ratio、 XP-EHH
7	114650001	114750000	θπ ratio、 XP-EHH
8	20500001	20600000	θπ ratio、 XP-EHH
8	23100001	23200000	θπ ratio、 XP-EHH
8	23900001	24000000	θπ ratio、 XP-EHH
8	23950001	24050000	θπ ratio、 XP-EHH
8	27700001	27800000	θπ ratio、 XP-EHH
8	27750001	27850000	θπ ratio、 XP-EHH
8	30000001	30100000	θπ ratio、 XP-EHH
8	30450001	30550000	θπ ratio、 XP-EHH
8	31800001	31900000	θπ ratio、 XP-EHH
8	48250001	48350000	θπ ratio、 XP-EHH
8	66700001	66800000	θπ ratio、 XP-EHH
8	66750001	66850000	θπ ratio、 XP-EHH
8	67500001	67600000	θπ ratio、 XP-EHH
8	79400001	79500000	θπ ratio、 XP-EHH
8	84450001	84550000	θπ ratio、 XP-EHH
8	84500001	84600000	θπ ratio、 XP-EHH
8	84550001	84650000	θπ ratio、 XP-EHH
8	84600001	84700000	θπ ratio、 XP-EHH
8	85600001	85700000	θπ ratio、 XP-EHH
8	87400001	87500000	θπ ratio、 XP-EHH
8	87450001	87550000	θπ ratio、 XP-EHH
8	87500001	87600000	θπ ratio、 XP-EHH
8	88500001	88600000	θπ ratio、 XP-EHH
8	88550001	88650000	θπ ratio、 XP-EHH
8	90450001	90550000	θπ ratio、 XP-EHH
8	90750001	90850000	θπ ratio、 XP-EHH
8	90800001	90900000	θπ ratio、 XP-EHH
8	90850001	90950000	θπ ratio、 XP-EHH
8	91450001	91550000	θπ ratio、 XP-EHH
8	91800001	91900000	θπ ratio、 XP-EHH
8	92550001	92650000	θπ ratio、 XP-EHH
8	92600001	92700000	θπ ratio、 XP-EHH
8	93800001	93900000	θπ ratio、 XP-EHH
8	93850001	93950000	θπ ratio、 XP-EHH
8	94000001	94100000	θπ ratio、 XP-EHH
8	94050001	94150000	θπ ratio、 XP-EHH
8	94250001	94350000	θπ ratio、 XP-EHH
8	94300001	94400000	θπ ratio、 XP-EHH
8	94350001	94450000	θπ ratio、 XP-EHH
8	94400001	94500000	θπ ratio、 XP-EHH
8	94450001	94550000	θπ ratio、 XP-EHH
8	94500001	94600000	θπ ratio、 XP-EHH
8	94550001	94650000	θπ ratio、 XP-EHH
8	94600001	94700000	θπ ratio、 XP-EHH
8	95800001	95900000	θπ ratio、 XP-EHH
8	96750001	96850000	θπ ratio、 XP-EHH
8	96800001	96900000	θπ ratio、 XP-EHH
8	96850001	96950000	θπ ratio、 XP-EHH
8	96900001	97000000	θπ ratio、 XP-EHH
8	97050001	97150000	θπ ratio、 XP-EHH
8	98350001	98450000	θπ ratio、 XP-EHH
8	99600001	99700000	θπ ratio、 XP-EHH
8	99650001	99750000	θπ ratio、 XP-EHH
8	99700001	99800000	θπ ratio、 XP-EHH
8	99750001	99850000	θπ ratio、 XP-EHH
8	99800001	99900000	θπ ratio、 XP-EHH
8	99850001	99950000	θπ ratio、 XP-EHH
8	99900001	100000000	θπ ratio、 XP-EHH
8	99950001	100050000	θπ ratio、 XP-EHH
8	100050001	100150000	θπ ratio、 XP-EHH
8	100550001	100650000	θπ ratio、 XP-EHH
8	101100001	101200000	θπ ratio、 XP-EHH
8	101850001	101950000	θπ ratio、 XP-EHH
8	101900001	102000000	θπ ratio、 XP-EHH
8	101950001	102050000	θπ ratio、 XP-EHH
8	102100001	102200000	θπ ratio、 XP-EHH
8	102150001	102250000	θπ ratio、 XP-EHH
8	102200001	102300000	θπ ratio、 XP-EHH
8	102250001	102350000	θπ ratio、 XP-EHH
8	102300001	102400000	θπ ratio、 XP-EHH
8	102550001	102650000	θπ ratio、 XP-EHH
8	102800001	102900000	θπ ratio、 XP-EHH
8	102850001	102950000	θπ ratio、 XP-EHH
8	102900001	103000000	θπ ratio、 XP-EHH
8	102950001	103050000	θπ ratio、 XP-EHH
8	103000001	103100000	θπ ratio、 XP-EHH
8	103050001	103150000	θπ ratio、 XP-EHH
8	103100001	103200000	θπ ratio、 XP-EHH
8	103150001	103250000	θπ ratio、 XP-EHH
8	103250001	103350000	θπ ratio、 XP-EHH
8	103300001	103400000	θπ ratio、 XP-EHH
8	103650001	103750000	θπ ratio、 XP-EHH
8	104400001	104500000	θπ ratio、 XP-EHH
8	105350001	105450000	θπ ratio、 XP-EHH
8	105400001	105500000	θπ ratio、 XP-EHH
8	105700001	105800000	θπ ratio、 XP-EHH
8	105900001	106000000	θπ ratio、 XP-EHH
8	105950001	106050000	θπ ratio、 XP-EHH
8	106000001	106100000	θπ ratio、 XP-EHH
8	106450001	106550000	θπ ratio、 XP-EHH
8	116300001	116400000	θπ ratio、 XP-EHH
8	116350001	116450000	θπ ratio、 XP-EHH
8	116400001	116500000	θπ ratio、 XP-EHH
8	116750001	116850000	θπ ratio、 XP-EHH
8	116900001	117000000	θπ ratio、 XP-EHH
8	117250001	117350000	θπ ratio、 XP-EHH
8	117650001	117750000	θπ ratio、 XP-EHH
8	117700001	117800000	θπ ratio、 XP-EHH
8	117850001	117950000	θπ ratio、 XP-EHH
8	118050001	118150000	θπ ratio、 XP-EHH
8	118100001	118200000	θπ ratio、 XP-EHH
8	121250001	121350000	θπ ratio、 XP-EHH
8	121300001	121400000	θπ ratio、 XP-EHH
8	121350001	121450000	θπ ratio、 XP-EHH
8	123650001	123750000	θπ ratio、 XP-EHH
8	138000001	138100000	θπ ratio、 XP-EHH
9	12400001	12500000	θπ ratio、 XP-EHH
9	13050001	13150000	θπ ratio、 XP-EHH
9	13100001	13200000	θπ ratio、 XP-EHH
9	13600001	13700000	θπ ratio、 XP-EHH
9	17650001	17750000	θπ ratio、 XP-EHH
9	17700001	17800000	θπ ratio、 XP-EHH
9	17750001	17850000	θπ ratio、 XP-EHH
9	17800001	17900000	θπ ratio、 XP-EHH
9	17850001	17950000	θπ ratio、 XP-EHH
9	17900001	18000000	θπ ratio、 XP-EHH
9	17950001	18050000	θπ ratio、 XP-EHH
9	18000001	18100000	θπ ratio、 XP-EHH
9	18050001	18150000	θπ ratio、 XP-EHH
9	18100001	18200000	θπ ratio、 XP-EHH
9	18150001	18250000	θπ ratio、 XP-EHH
9	18200001	18300000	θπ ratio、 XP-EHH
9	18250001	18350000	θπ ratio、 XP-EHH
9	21100001	21200000	θπ ratio、 XP-EHH
9	21150001	21250000	θπ ratio、 XP-EHH
9	21250001	21350000	θπ ratio、 XP-EHH
9	21300001	21400000	θπ ratio、 XP-EHH
9	21650001	21750000	θπ ratio、 XP-EHH
9	21900001	22000000	θπ ratio、 XP-EHH
9	23050001	23150000	θπ ratio、 XP-EHH
9	23100001	23200000	θπ ratio、 XP-EHH
9	23400001	23500000	θπ ratio、 XP-EHH
9	23450001	23550000	θπ ratio、 XP-EHH
9	23500001	23600000	θπ ratio、 XP-EHH
9	26650001	26750000	θπ ratio、 XP-EHH
9	26700001	26800000	θπ ratio、 XP-EHH
9	28400001	28500000	θπ ratio、 XP-EHH
9	32250001	32350000	θπ ratio、 XP-EHH
9	70050001	70150000	θπ ratio、 XP-EHH
9	78550001	78650000	θπ ratio、 XP-EHH
9	78600001	78700000	θπ ratio、 XP-EHH
9	79550001	79650000	θπ ratio、 XP-EHH
9	79600001	79700000	θπ ratio、 XP-EHH
9	85650001	85750000	θπ ratio、 XP-EHH
9	85700001	85800000	θπ ratio、 XP-EHH
9	85750001	85850000	θπ ratio、 XP-EHH
9	85800001	85900000	θπ ratio、 XP-EHH
9	102250001	102350000	θπ ratio、 XP-EHH
9	102300001	102400000	θπ ratio、 XP-EHH
9	102400001	102500000	θπ ratio、 XP-EHH
9	102450001	102550000	θπ ratio、 XP-EHH
9	113850001	113950000	θπ ratio、 XP-EHH
9	113900001	114000000	θπ ratio、 XP-EHH
9	113950001	114050000	θπ ratio、 XP-EHH
9	138900001	139000000	θπ ratio、 XP-EHH
9	138950001	139050000	θπ ratio、 XP-EHH
9	139000001	139100000	θπ ratio、 XP-EHH
9	139050001	139150000	θπ ratio、 XP-EHH
9	139100001	139200000	θπ ratio、 XP-EHH
10	34800001	34900000	θπ ratio、 XP-EHH
10	35050001	35150000	θπ ratio、 XP-EHH
11	15950001	16050000	θπ ratio、 XP-EHH
11	16000001	16100000	θπ ratio、 XP-EHH
11	30750001	30850000	θπ ratio、 XP-EHH
11	32500001	32600000	θπ ratio、 XP-EHH
11	32550001	32650000	θπ ratio、 XP-EHH
11	32600001	32700000	θπ ratio、 XP-EHH
11	32650001	32750000	θπ ratio、 XP-EHH
11	32700001	32800000	θπ ratio、 XP-EHH
11	32950001	33050000	θπ ratio、 XP-EHH
11	33000001	33100000	θπ ratio、 XP-EHH
11	44800001	44900000	θπ ratio、 XP-EHH
11	56500001	56600000	θπ ratio、 XP-EHH
11	66700001	66800000	θπ ratio、 XP-EHH
11	66750001	66850000	θπ ratio、 XP-EHH
11	67550001	67650000	θπ ratio、 XP-EHH
11	68450001	68550000	θπ ratio、 XP-EHH
11	68500001	68600000	θπ ratio、 XP-EHH
11	70300001	70400000	θπ ratio、 XP-EHH
11	70350001	70450000	θπ ratio、 XP-EHH
11	71850001	71950000	θπ ratio、 XP-EHH
11	71900001	72000000	θπ ratio、 XP-EHH
11	71950001	72050000	θπ ratio、 XP-EHH
11	72000001	72100000	θπ ratio、 XP-EHH
11	72350001	72450000	θπ ratio、 XP-EHH
11	73150001	73250000	θπ ratio、 XP-EHH
11	73200001	73300000	θπ ratio、 XP-EHH
11	73300001	73400000	θπ ratio、 XP-EHH
11	73550001	73650000	θπ ratio、 XP-EHH
11	73600001	73700000	θπ ratio、 XP-EHH
11	73650001	73750000	θπ ratio、 XP-EHH
11	73700001	73800000	θπ ratio、 XP-EHH
11	73750001	73850000	θπ ratio、 XP-EHH
11	74900001	75000000	θπ ratio、 XP-EHH
11	74950001	75050000	θπ ratio、 XP-EHH
11	75000001	75100000	θπ ratio、 XP-EHH
11	75050001	75150000	θπ ratio、 XP-EHH
12	17250001	17350000	θπ ratio、 XP-EHH
12	17300001	17400000	θπ ratio、 XP-EHH
12	27050001	27150000	θπ ratio、 XP-EHH
12	27300001	27400000	θπ ratio、 XP-EHH
12	27600001	27700000	θπ ratio、 XP-EHH
12	27800001	27900000	θπ ratio、 XP-EHH
12	29200001	29300000	θπ ratio、 XP-EHH
12	31200001	31300000	θπ ratio、 XP-EHH
12	31250001	31350000	θπ ratio、 XP-EHH
12	31350001	31450000	θπ ratio、 XP-EHH
12	44350001	44450000	θπ ratio、 XP-EHH
12	44400001	44500000	θπ ratio、 XP-EHH
12	44900001	45000000	θπ ratio、 XP-EHH
12	45600001	45700000	θπ ratio、 XP-EHH
12	45650001	45750000	θπ ratio、 XP-EHH
12	56700001	56800000	θπ ratio、 XP-EHH
12	56850001	56950000	θπ ratio、 XP-EHH
12	60850001	60950000	θπ ratio、 XP-EHH
12	61300001	61400000	θπ ratio、 XP-EHH
13	15250001	15350000	θπ ratio、 XP-EHH
13	15300001	15400000	θπ ratio、 XP-EHH
13	15450001	15550000	θπ ratio、 XP-EHH
13	17400001	17500000	θπ ratio、 XP-EHH
13	18350001	18450000	θπ ratio、 XP-EHH
13	18400001	18500000	θπ ratio、 XP-EHH
13	20150001	20250000	θπ ratio、 XP-EHH
13	20200001	20300000	θπ ratio、 XP-EHH
13	23450001	23550000	θπ ratio、 XP-EHH
13	23500001	23600000	θπ ratio、 XP-EHH
13	24200001	24300000	θπ ratio、 XP-EHH
13	24250001	24350000	θπ ratio、 XP-EHH
13	24500001	24600000	θπ ratio、 XP-EHH
13	25100001	25200000	θπ ratio、 XP-EHH
13	25150001	25250000	θπ ratio、 XP-EHH
13	25200001	25300000	θπ ratio、 XP-EHH
13	25250001	25350000	θπ ratio、 XP-EHH
13	25350001	25450000	θπ ratio、 XP-EHH
13	27650001	27750000	θπ ratio、 XP-EHH
13	27700001	27800000	θπ ratio、 XP-EHH
13	27850001	27950000	θπ ratio、 XP-EHH
13	27900001	28000000	θπ ratio、 XP-EHH
13	27950001	28050000	θπ ratio、 XP-EHH
13	28000001	28100000	θπ ratio、 XP-EHH
13	28050001	28150000	θπ ratio、 XP-EHH
13	28100001	28200000	θπ ratio、 XP-EHH
13	28150001	28250000	θπ ratio、 XP-EHH
13	28200001	28300000	θπ ratio、 XP-EHH
13	28250001	28350000	θπ ratio、 XP-EHH
13	28450001	28550000	θπ ratio、 XP-EHH
13	28500001	28600000	θπ ratio、 XP-EHH
13	28550001	28650000	θπ ratio、 XP-EHH
13	28750001	28850000	θπ ratio、 XP-EHH
13	41050001	41150000	θπ ratio、 XP-EHH
13	41950001	42050000	θπ ratio、 XP-EHH
13	42450001	42550000	θπ ratio、 XP-EHH
13	42500001	42600000	θπ ratio、 XP-EHH
13	42550001	42650000	θπ ratio、 XP-EHH
13	42900001	43000000	θπ ratio、 XP-EHH
13	42950001	43050000	θπ ratio、 XP-EHH
13	47000001	47100000	θπ ratio、 XP-EHH
13	47050001	47150000	θπ ratio、 XP-EHH
13	48250001	48350000	θπ ratio、 XP-EHH
13	48300001	48400000	θπ ratio、 XP-EHH
13	48350001	48450000	θπ ratio、 XP-EHH
13	48800001	48900000	θπ ratio、 XP-EHH
13	49550001	49650000	θπ ratio、 XP-EHH
13	49600001	49700000	θπ ratio、 XP-EHH
13	50250001	50350000	θπ ratio、 XP-EHH
13	51450001	51550000	θπ ratio、 XP-EHH
13	51500001	51600000	θπ ratio、 XP-EHH
13	51550001	51650000	θπ ratio、 XP-EHH
13	51600001	51700000	θπ ratio、 XP-EHH
13	51800001	51900000	θπ ratio、 XP-EHH
13	51850001	51950000	θπ ratio、 XP-EHH
13	51900001	52000000	θπ ratio、 XP-EHH
13	51950001	52050000	θπ ratio、 XP-EHH
13	52000001	52100000	θπ ratio、 XP-EHH
13	52050001	52150000	θπ ratio、 XP-EHH
13	52100001	52200000	θπ ratio、 XP-EHH
13	52300001	52400000	θπ ratio、 XP-EHH
13	52350001	52450000	θπ ratio、 XP-EHH
13	52400001	52500000	θπ ratio、 XP-EHH
13	52750001	52850000	θπ ratio、 XP-EHH
13	52800001	52900000	θπ ratio、 XP-EHH
13	52850001	52950000	θπ ratio、 XP-EHH
13	53050001	53150000	θπ ratio、 XP-EHH
13	53100001	53200000	θπ ratio、 XP-EHH
13	53150001	53250000	θπ ratio、 XP-EHH
13	53200001	53300000	θπ ratio、 XP-EHH
13	53250001	53350000	θπ ratio、 XP-EHH
13	53300001	53400000	θπ ratio、 XP-EHH
13	53350001	53450000	θπ ratio、 XP-EHH
13	53500001	53600000	θπ ratio、 XP-EHH
13	53550001	53650000	θπ ratio、 XP-EHH
13	53600001	53700000	θπ ratio、 XP-EHH
13	53900001	54000000	θπ ratio、 XP-EHH
13	53950001	54050000	θπ ratio、 XP-EHH
13	54000001	54100000	θπ ratio、 XP-EHH
13	54050001	54150000	θπ ratio、 XP-EHH
13	54100001	54200000	θπ ratio、 XP-EHH
13	54150001	54250000	θπ ratio、 XP-EHH
13	54200001	54300000	θπ ratio、 XP-EHH
13	54400001	54500000	θπ ratio、 XP-EHH
13	54500001	54600000	θπ ratio、 XP-EHH
13	54550001	54650000	θπ ratio、 XP-EHH
13	54600001	54700000	θπ ratio、 XP-EHH
13	54650001	54750000	θπ ratio、 XP-EHH
13	54700001	54800000	θπ ratio、 XP-EHH
13	54750001	54850000	θπ ratio、 XP-EHH
13	54800001	54900000	θπ ratio、 XP-EHH
13	54850001	54950000	θπ ratio、 XP-EHH
13	54900001	55000000	θπ ratio、 XP-EHH
13	54950001	55050000	θπ ratio、 XP-EHH
13	55000001	55100000	θπ ratio、 XP-EHH
13	55050001	55150000	θπ ratio、 XP-EHH
13	55300001	55400000	θπ ratio、 XP-EHH
13	55350001	55450000	θπ ratio、 XP-EHH
13	55400001	55500000	θπ ratio、 XP-EHH
13	55450001	55550000	θπ ratio、 XP-EHH
13	55600001	55700000	θπ ratio、 XP-EHH
13	55650001	55750000	θπ ratio、 XP-EHH
13	55700001	55800000	θπ ratio、 XP-EHH
13	55750001	55850000	θπ ratio、 XP-EHH
13	55800001	55900000	θπ ratio、 XP-EHH
13	55850001	55950000	θπ ratio、 XP-EHH
13	55900001	56000000	θπ ratio、 XP-EHH
13	55950001	56050000	θπ ratio、 XP-EHH
13	56400001	56500000	θπ ratio、 XP-EHH
13	56450001	56550000	θπ ratio、 XP-EHH
13	56750001	56850000	θπ ratio、 XP-EHH
13	56800001	56900000	θπ ratio、 XP-EHH
13	58000001	58100000	θπ ratio、 XP-EHH
13	58100001	58200000	θπ ratio、 XP-EHH
13	58150001	58250000	θπ ratio、 XP-EHH
13	58200001	58300000	θπ ratio、 XP-EHH
13	58300001	58400000	θπ ratio、 XP-EHH
13	58350001	58450000	θπ ratio、 XP-EHH
13	58400001	58500000	θπ ratio、 XP-EHH
13	58450001	58550000	θπ ratio、 XP-EHH
13	58600001	58700000	θπ ratio、 XP-EHH
13	58650001	58750000	θπ ratio、 XP-EHH
13	58700001	58800000	θπ ratio、 XP-EHH
13	58750001	58850000	θπ ratio、 XP-EHH
13	58800001	58900000	θπ ratio、 XP-EHH
13	59600001	59700000	θπ ratio、 XP-EHH
13	59700001	59800000	θπ ratio、 XP-EHH
13	62550001	62650000	θπ ratio、 XP-EHH
13	62600001	62700000	θπ ratio、 XP-EHH
13	64250001	64350000	θπ ratio、 XP-EHH
13	64300001	64400000	θπ ratio、 XP-EHH
13	64650001	64750000	θπ ratio、 XP-EHH
13	65900001	66000000	θπ ratio、 XP-EHH
13	66000001	66100000	θπ ratio、 XP-EHH
13	66050001	66150000	θπ ratio、 XP-EHH
13	66100001	66200000	θπ ratio、 XP-EHH
13	66150001	66250000	θπ ratio、 XP-EHH
13	66200001	66300000	θπ ratio、 XP-EHH
13	66250001	66350000	θπ ratio、 XP-EHH
13	66650001	66750000	θπ ratio、 XP-EHH
13	66700001	66800000	θπ ratio、 XP-EHH
13	66750001	66850000	θπ ratio、 XP-EHH
13	66800001	66900000	θπ ratio、 XP-EHH
13	66850001	66950000	θπ ratio、 XP-EHH
13	66900001	67000000	θπ ratio、 XP-EHH
13	67200001	67300000	θπ ratio、 XP-EHH
13	67250001	67350000	θπ ratio、 XP-EHH
13	67300001	67400000	θπ ratio、 XP-EHH
13	67400001	67500000	θπ ratio、 XP-EHH
13	67550001	67650000	θπ ratio、 XP-EHH
13	67600001	67700000	θπ ratio、 XP-EHH
13	67650001	67750000	θπ ratio、 XP-EHH
13	67700001	67800000	θπ ratio、 XP-EHH
13	67750001	67850000	θπ ratio、 XP-EHH
13	67800001	67900000	θπ ratio、 XP-EHH
13	67850001	67950000	θπ ratio、 XP-EHH
13	68150001	68250000	θπ ratio、 XP-EHH
13	68200001	68300000	θπ ratio、 XP-EHH
13	68250001	68350000	θπ ratio、 XP-EHH
13	68300001	68400000	θπ ratio、 XP-EHH
13	68400001	68500000	θπ ratio、 XP-EHH
13	68750001	68850000	θπ ratio、 XP-EHH
13	68800001	68900000	θπ ratio、 XP-EHH
13	68850001	68950000	θπ ratio、 XP-EHH
13	68900001	69000000	θπ ratio、 XP-EHH
13	68950001	69050000	θπ ratio、 XP-EHH
13	69000001	69100000	θπ ratio、 XP-EHH
13	69050001	69150000	θπ ratio、 XP-EHH
13	69100001	69200000	θπ ratio、 XP-EHH
13	69200001	69300000	θπ ratio、 XP-EHH
13	69250001	69350000	θπ ratio、 XP-EHH
13	79500001	79600000	θπ ratio、 XP-EHH
13	79550001	79650000	θπ ratio、 XP-EHH
13	79600001	79700000	θπ ratio、 XP-EHH
13	79650001	79750000	θπ ratio、 XP-EHH
13	94800001	94900000	θπ ratio、 XP-EHH
13	99750001	99850000	θπ ratio、 XP-EHH
13	99800001	99900000	θπ ratio、 XP-EHH
13	99850001	99950000	θπ ratio、 XP-EHH
13	99900001	100000000	θπ ratio、 XP-EHH
13	99950001	100050000	θπ ratio、 XP-EHH
13	100000001	100100000	θπ ratio、 XP-EHH
13	103400001	103500000	θπ ratio、 XP-EHH
13	108400001	108500000	θπ ratio、 XP-EHH
13	108450001	108550000	θπ ratio、 XP-EHH
13	108500001	108600000	θπ ratio、 XP-EHH
13	108700001	108800000	θπ ratio、 XP-EHH
13	134400001	134500000	θπ ratio、 XP-EHH
13	134550001	134650000	θπ ratio、 XP-EHH
13	151750001	151850000	θπ ratio、 XP-EHH
13	153550001	153650000	θπ ratio、 XP-EHH
13	153600001	153700000	θπ ratio、 XP-EHH
13	153650001	153750000	θπ ratio、 XP-EHH
13	154450001	154550000	θπ ratio、 XP-EHH
13	154500001	154600000	θπ ratio、 XP-EHH
13	155000001	155100000	θπ ratio、 XP-EHH
13	155050001	155150000	θπ ratio、 XP-EHH
13	155100001	155200000	θπ ratio、 XP-EHH
13	155150001	155250000	θπ ratio、 XP-EHH
13	155200001	155300000	θπ ratio、 XP-EHH
13	155250001	155350000	θπ ratio、 XP-EHH
13	155300001	155400000	θπ ratio、 XP-EHH
13	157450001	157550000	θπ ratio、 XP-EHH
13	157500001	157600000	θπ ratio、 XP-EHH
13	157550001	157650000	θπ ratio、 XP-EHH
13	157600001	157700000	θπ ratio、 XP-EHH
13	157650001	157750000	θπ ratio、 XP-EHH
13	159500001	159600000	θπ ratio、 XP-EHH
13	159800001	159900000	θπ ratio、 XP-EHH
13	170100001	170200000	θπ ratio、 XP-EHH
13	172100001	172200000	θπ ratio、 XP-EHH
13	172750001	172850000	θπ ratio、 XP-EHH
13	173600001	173700000	θπ ratio、 XP-EHH
13	173650001	173750000	θπ ratio、 XP-EHH
13	173700001	173800000	θπ ratio、 XP-EHH
13	173750001	173850000	θπ ratio、 XP-EHH
13	174000001	174100000	θπ ratio、 XP-EHH
13	174050001	174150000	θπ ratio、 XP-EHH
13	174100001	174200000	θπ ratio、 XP-EHH
13	174150001	174250000	θπ ratio、 XP-EHH
13	174200001	174300000	θπ ratio、 XP-EHH
13	174250001	174350000	θπ ratio、 XP-EHH
13	174300001	174400000	θπ ratio、 XP-EHH
13	174350001	174450000	θπ ratio、 XP-EHH
13	174400001	174500000	θπ ratio、 XP-EHH
13	174450001	174550000	θπ ratio、 XP-EHH
13	174500001	174600000	θπ ratio、 XP-EHH
13	174850001	174950000	θπ ratio、 XP-EHH
13	174900001	175000000	θπ ratio、 XP-EHH
13	174950001	175050000	θπ ratio、 XP-EHH
13	175200001	175300000	θπ ratio、 XP-EHH
13	185250001	185350000	θπ ratio、 XP-EHH
13	185300001	185400000	θπ ratio、 XP-EHH
13	188400001	188500000	θπ ratio、 XP-EHH
14	5100001	5200000	θπ ratio、 XP-EHH
14	9400001	9500000	θπ ratio、 XP-EHH
14	15050001	15150000	θπ ratio、 XP-EHH
14	15100001	15200000	θπ ratio、 XP-EHH
14	15150001	15250000	θπ ratio、 XP-EHH
14	47300001	47400000	θπ ratio、 XP-EHH
14	47350001	47450000	θπ ratio、 XP-EHH
14	47400001	47500000	θπ ratio、 XP-EHH
14	47450001	47550000	θπ ratio、 XP-EHH
14	48050001	48150000	θπ ratio、 XP-EHH
14	48100001	48200000	θπ ratio、 XP-EHH
14	48150001	48250000	θπ ratio、 XP-EHH
14	48200001	48300000	θπ ratio、 XP-EHH
14	48250001	48350000	θπ ratio、 XP-EHH
14	48300001	48400000	θπ ratio、 XP-EHH
14	48350001	48450000	θπ ratio、 XP-EHH
14	48600001	48700000	θπ ratio、 XP-EHH
14	50150001	50250000	θπ ratio、 XP-EHH
14	50200001	50300000	θπ ratio、 XP-EHH
14	50300001	50400000	θπ ratio、 XP-EHH
14	50350001	50450000	θπ ratio、 XP-EHH
14	50400001	50500000	θπ ratio、 XP-EHH
14	60750001	60850000	θπ ratio、 XP-EHH
14	60800001	60900000	θπ ratio、 XP-EHH
14	60850001	60950000	θπ ratio、 XP-EHH
14	61150001	61250000	θπ ratio、 XP-EHH
14	61300001	61400000	θπ ratio、 XP-EHH
14	61350001	61450000	θπ ratio、 XP-EHH
14	62200001	62300000	θπ ratio、 XP-EHH
14	67650001	67750000	θπ ratio、 XP-EHH
14	79350001	79450000	θπ ratio、 XP-EHH
14	79400001	79500000	θπ ratio、 XP-EHH
14	82100001	82200000	θπ ratio、 XP-EHH
14	82150001	82250000	θπ ratio、 XP-EHH
14	84500001	84600000	θπ ratio、 XP-EHH
14	95900001	96000000	θπ ratio、 XP-EHH
14	101850001	101950000	θπ ratio、 XP-EHH
14	101900001	102000000	θπ ratio、 XP-EHH
14	116400001	116500000	θπ ratio、 XP-EHH
14	116450001	116550000	θπ ratio、 XP-EHH
14	116800001	116900000	θπ ratio、 XP-EHH
14	116850001	116950000	θπ ratio、 XP-EHH
14	121200001	121300000	θπ ratio、 XP-EHH
14	121250001	121350000	θπ ratio、 XP-EHH
14	121300001	121400000	θπ ratio、 XP-EHH
14	121350001	121450000	θπ ratio、 XP-EHH
14	121750001	121850000	θπ ratio、 XP-EHH
14	121800001	121900000	θπ ratio、 XP-EHH
15	7400001	7500000	θπ ratio、 XP-EHH
15	7450001	7550000	θπ ratio、 XP-EHH
15	17150001	17250000	θπ ratio、 XP-EHH
15	17200001	17300000	θπ ratio、 XP-EHH
15	19800001	19900000	θπ ratio、 XP-EHH
15	19850001	19950000	θπ ratio、 XP-EHH
15	75100001	75200000	θπ ratio、 XP-EHH
15	89000001	89100000	θπ ratio、 XP-EHH
15	89050001	89150000	θπ ratio、 XP-EHH
15	107400001	107500000	θπ ratio、 XP-EHH
15	107450001	107550000	θπ ratio、 XP-EHH
15	124900001	125000000	θπ ratio、 XP-EHH
15	124950001	125050000	θπ ratio、 XP-EHH
15	125000001	125100000	θπ ratio、 XP-EHH
16	2450001	2550000	θπ ratio、 XP-EHH
16	2500001	2600000	θπ ratio、 XP-EHH
16	40600001	40700000	θπ ratio、 XP-EHH
16	41500001	41600000	θπ ratio、 XP-EHH
16	41550001	41650000	θπ ratio、 XP-EHH
16	41650001	41750000	θπ ratio、 XP-EHH
16	41700001	41800000	θπ ratio、 XP-EHH
16	41750001	41850000	θπ ratio、 XP-EHH
16	47700001	47800000	θπ ratio、 XP-EHH
16	55950001	56050000	θπ ratio、 XP-EHH
16	56000001	56100000	θπ ratio、 XP-EHH
16	56050001	56150000	θπ ratio、 XP-EHH
16	56100001	56200000	θπ ratio、 XP-EHH
16	56150001	56250000	θπ ratio、 XP-EHH
16	57450001	57550000	θπ ratio、 XP-EHH
16	57500001	57600000	θπ ratio、 XP-EHH
16	57550001	57650000	θπ ratio、 XP-EHH
16	57600001	57700000	θπ ratio、 XP-EHH
16	57650001	57750000	θπ ratio、 XP-EHH
16	57700001	57800000	θπ ratio、 XP-EHH
16	57750001	57850000	θπ ratio、 XP-EHH
16	57800001	57900000	θπ ratio、 XP-EHH
16	57850001	57950000	θπ ratio、 XP-EHH
16	57900001	58000000	θπ ratio、 XP-EHH
16	57950001	58050000	θπ ratio、 XP-EHH
16	58000001	58100000	θπ ratio、 XP-EHH
16	58050001	58150000	θπ ratio、 XP-EHH
16	58100001	58200000	θπ ratio、 XP-EHH
16	58150001	58250000	θπ ratio、 XP-EHH
16	58200001	58300000	θπ ratio、 XP-EHH
16	60750001	60850000	θπ ratio、 XP-EHH
16	60800001	60900000	θπ ratio、 XP-EHH
16	61150001	61250000	θπ ratio、 XP-EHH
16	61200001	61300000	θπ ratio、 XP-EHH
16	61250001	61350000	θπ ratio、 XP-EHH
16	65400001	65500000	θπ ratio、 XP-EHH
16	67050001	67150000	θπ ratio、 XP-EHH
16	67100001	67200000	θπ ratio、 XP-EHH
16	67350001	67450000	θπ ratio、 XP-EHH
16	67400001	67500000	θπ ratio、 XP-EHH
16	67450001	67550000	θπ ratio、 XP-EHH
16	67500001	67600000	θπ ratio、 XP-EHH
16	67600001	67700000	θπ ratio、 XP-EHH
16	67650001	67750000	θπ ratio、 XP-EHH
16	67700001	67800000	θπ ratio、 XP-EHH
16	67750001	67850000	θπ ratio、 XP-EHH
16	67800001	67900000	θπ ratio、 XP-EHH
16	67850001	67950000	θπ ratio、 XP-EHH
16	67900001	68000000	θπ ratio、 XP-EHH
16	67950001	68050000	θπ ratio、 XP-EHH
16	68400001	68500000	θπ ratio、 XP-EHH
16	68450001	68550000	θπ ratio、 XP-EHH
16	68500001	68600000	θπ ratio、 XP-EHH
16	68550001	68650000	θπ ratio、 XP-EHH
16	68600001	68700000	θπ ratio、 XP-EHH
16	68650001	68750000	θπ ratio、 XP-EHH
16	68700001	68800000	θπ ratio、 XP-EHH
16	68750001	68850000	θπ ratio、 XP-EHH
16	68800001	68900000	θπ ratio、 XP-EHH
16	68850001	68950000	θπ ratio、 XP-EHH
16	68900001	69000000	θπ ratio、 XP-EHH
16	69150001	69250000	θπ ratio、 XP-EHH
16	69200001	69300000	θπ ratio、 XP-EHH
16	69600001	69700000	θπ ratio、 XP-EHH
16	69650001	69750000	θπ ratio、 XP-EHH
16	69700001	69800000	θπ ratio、 XP-EHH
16	69750001	69850000	θπ ratio、 XP-EHH
16	69800001	69900000	θπ ratio、 XP-EHH
16	70050001	70150000	θπ ratio、 XP-EHH
16	70100001	70200000	θπ ratio、 XP-EHH
16	70400001	70500000	θπ ratio、 XP-EHH
16	70450001	70550000	θπ ratio、 XP-EHH
16	70550001	70650000	θπ ratio、 XP-EHH
16	70800001	70900000	θπ ratio、 XP-EHH
16	71100001	71200000	θπ ratio、 XP-EHH
16	71150001	71250000	θπ ratio、 XP-EHH
16	71250001	71350000	θπ ratio、 XP-EHH
16	71300001	71400000	θπ ratio、 XP-EHH
16	72350001	72450000	θπ ratio、 XP-EHH
16	72400001	72500000	θπ ratio、 XP-EHH
16	72600001	72700000	θπ ratio、 XP-EHH
16	72650001	72750000	θπ ratio、 XP-EHH
16	72800001	72900000	θπ ratio、 XP-EHH
17	1850001	1950000	θπ ratio、 XP-EHH
17	11400001	11500000	θπ ratio、 XP-EHH
17	11450001	11550000	θπ ratio、 XP-EHH
18	6750001	6850000	θπ ratio、 XP-EHH
18	6800001	6900000	θπ ratio、 XP-EHH
18	10050001	10150000	θπ ratio、 XP-EHH
18	10100001	10200000	θπ ratio、 XP-EHH
18	11500001	11600000	θπ ratio、 XP-EHH
18	11550001	11650000	θπ ratio、 XP-EHH
18	11600001	11700000	θπ ratio、 XP-EHH
18	11650001	11750000	θπ ratio、 XP-EHH
18	11800001	11900000	θπ ratio、 XP-EHH
18	11850001	11950000	θπ ratio、 XP-EHH
18	11900001	12000000	θπ ratio、 XP-EHH
18	12250001	12350000	θπ ratio、 XP-EHH
18	12300001	12400000	θπ ratio、 XP-EHH
18	21150001	21250000	θπ ratio、 XP-EHH
18	23550001	23650000	θπ ratio、 XP-EHH
18	24050001	24150000	θπ ratio、 XP-EHH
18	25300001	25400000	θπ ratio、 XP-EHH
18	25350001	25450000	θπ ratio、 XP-EHH
18	25700001	25800000	θπ ratio、 XP-EHH
18	27400001	27500000	θπ ratio、 XP-EHH
18	27450001	27550000	θπ ratio、 XP-EHH
18	27500001	27600000	θπ ratio、 XP-EHH
18	27550001	27650000	θπ ratio、 XP-EHH
18	27600001	27700000	θπ ratio、 XP-EHH
18	29750001	29850000	θπ ratio、 XP-EHH
18	29800001	29900000	θπ ratio、 XP-EHH
18	29850001	29950000	θπ ratio、 XP-EHH
18	29900001	30000000	θπ ratio、 XP-EHH
18	29950001	30050000	θπ ratio、 XP-EHH
18	45800001	45900000	θπ ratio、 XP-EHH
18	46850001	46950000	θπ ratio、 XP-EHH
18	47400001	47500000	θπ ratio、 XP-EHH
18	47450001	47550000	θπ ratio、 XP-EHH
18	47500001	47600000	θπ ratio、 XP-EHH
18	47550001	47650000	θπ ratio、 XP-EHH
18	47600001	47700000	θπ ratio、 XP-EHH
18	47650001	47750000	θπ ratio、 XP-EHH
18	50000001	50100000	θπ ratio、 XP-EHH
18	50250001	50350000	θπ ratio、 XP-EHH
18	50300001	50400000	θπ ratio、 XP-EHH
18	50350001	50450000	θπ ratio、 XP-EHH
18	50600001	50700000	θπ ratio、 XP-EHH
18	50650001	50750000	θπ ratio、 XP-EHH
18	50700001	50800000	θπ ratio、 XP-EHH
18	50950001	51050000	θπ ratio、 XP-EHH

## Sheet: Table S5
Table S5. Gene annotation of candidate regions
Chr	Start	End	Gene name	Gene stable ID
6	54337488	54366064	HRC	ENSSSCG00000003156
6	54342508	54377555	TRPM4	ENSSSCG00000022672
6	54387260	54394127		ENSSSCG00000038264
6	54440695	54452214	CD37	ENSSSCG00000033849
6	54448188	54462285	TEAD2	ENSSSCG00000025568
6	54463492	54471767	DKKL1	ENSSSCG00000038579
6	54479770	54500887	CCDC155	ENSSSCG00000003172
6	54504908	54505692	PTH2	ENSSSCG00000003171
6	54507149	54510819	GFY	ENSSSCG00000035723
6	54511126	54521616	SLC17A7	ENSSSCG00000003170
6	54522564	54537588	PIH1D1	ENSSSCG00000003169
6	54528848	54548146	ALDH16A1	ENSSSCG00000003168
6	54552624	54563806	FLT3LG	ENSSSCG00000003167
6	54564818	54572616		ENSSSCG00000034448
6	54566454	54566537	SNORD33	ENSSSCG00000028483
6	54567160	54567240	SNORD33	ENSSSCG00000025540
6	54567450	54567519	SNORD34	ENSSSCG00000023143
6	54567728	54567807	SNORD35	ENSSSCG00000027829
6	54577414	54580846	RPS11	ENSSSCG00000003165
6	54578888	54578978	SNORD35	ENSSSCG00000024521
6	54580912	54580988	ssc-mir-150-1	ENSSSCG00000027317
6	54581133	54600340	FCGRT	ENSSSCG00000003187
6	54599464	54611273	RCN3	ENSSSCG00000024823
6	54618956	54635964	NOSIP	ENSSSCG00000029154
6	54637563	54643738	PRRG2	ENSSSCG00000003161
6	54646574	54674285	PRR12	ENSSSCG00000032668
6	54680597	54684719	RRAS	ENSSSCG00000003183
6	54689248	54700375	SCAF1	ENSSSCG00000038807
8	53704913	53706274	APELA	ENSSSCG00000031750
8	53738862	53761213		ENSSSCG00000035142
8	55124254	55124354	U6	ENSSSCG00000020369
8	55139767	55156980	EXOC1L	ENSSSCG00000022882
8	55189324	55246528	EXOC1	ENSSSCG00000023269
8	55219313	55219886		ENSSSCG00000027301
8	55250621	55325388	CEP135	ENSSSCG00000022283
8	65084754	65084886	SNORA31	ENSSSCG00000020337
8	66646240	66663405		ENSSSCG00000034976
8	66711237	66761168		ENSSSCG00000032414
8	66725943	66748873	SULT1B1	ENSSSCG00000032374
8	66868566	66874540		ENSSSCG00000036508
8	66888231	66908305	CSN1S1	ENSSSCG00000009262
8	66915923	66920190	CSN2	ENSSSCG00000009261
8	66926670	66932260		ENSSSCG00000038155
8	66944849	66953345	STATH	ENSSSCG00000023797
8	66971139	67009131		ENSSSCG00000009263
8	67059284	67068116	ODAM	ENSSSCG00000009266
8	67099131	67109111	CSN3	ENSSSCG00000009267
8	67161879	67163057	CABS1	ENSSSCG00000039238
8	67255906	67269788		ENSSSCG00000036999
8	67304325	67305962		ENSSSCG00000033464
8	67312972	67326085	AMTN	ENSSSCG00000008936
8	67381125	67394611	AMBN	ENSSSCG00000008937
8	67416482	67431188	ENAM	ENSSSCG00000008938
8	67439218	67495044	JCHAIN	ENSSSCG00000035379
8	67454568	67458814		ENSSSCG00000040525
8	67475893	67477583	UTP3	ENSSSCG00000028466
8	67495464	67582142		ENSSSCG00000025514
8	67571236	67571405		ENSSSCG00000031777
8	67590969	67607304	GRSF1	ENSSSCG00000008940
8	67647857	67731081	DCK	ENSSSCG00000008942
8	79016578	79017088		ENSSSCG00000040704
8	79141068	79497012		ENSSSCG00000035623
8	79334757	79334829		ENSSSCG00000033075
13	134405169	134539326	LRCH3	ENSSSCG00000011854
13	134492460	134492586	SNORA31	ENSSSCG00000020163
13	134495552	134495852		ENSSSCG00000038638
13	134540368	134588271	IQCG	ENSSSCG00000011855
13	134588328	134638645		ENSSSCG00000040273
13	134596155	134653434	LMLN	ENSSSCG00000011857
14	110827900	110877943	ENTPD7	ENSSSCG00000010540
14	110864531	110864971		ENSSSCG00000034135
14	110875619	110895002	COX15	ENSSSCG00000010541
14	110895036	110921907	CUTC	ENSSSCG00000010542
7	48666931	48873818		ENSSSCG00000038708
8	66810462	66838682		ENSSSCG00000039341
2	1247139	1250129	SYT8	ENSSSCG00000023537
2	1251527	1254226	TNNI2	ENSSSCG00000033260
2	1261674	1299439	LSP1	ENSSSCG00000031487
2	1291929	1297517		ENSSSCG00000036244
2	1299273	1316514	TNNT3	ENSSSCG00000031903
2	1346905	1352948		ENSSSCG00000038364
2	1384046	1384113	H19_2	ENSSSCG00000033344
6	53200659	53231802	SLC8A2	ENSSSCG00000029567
6	53238629	53245886	KPTN	ENSSSCG00000003121
6	53249330	53275306	NAPA	ENSSSCG00000003120
6	53280048	53306736	ZNF541	ENSSSCG00000003119
6	54231329	54250317	GYS1	ENSSSCG00000003154
6	54241129	54266893	RUVBL2	ENSSSCG00000003152
6	54247483	54283701		ENSSSCG00000039749
6	54263576	54268682		ENSSSCG00000031086
6	54271246	54274092	NTF4	ENSSSCG00000003160
6	54278887	54286838	KCNA7	ENSSSCG00000003159
6	54288367	54304270		ENSSSCG00000023792
6	54302892	54308064		ENSSSCG00000040351
6	54309536	54313138	LIN7B	ENSSSCG00000003157
6	54313981	54337339	PPFIA3	ENSSSCG00000022324
6	85059871	85088137	SMPDL3B	ENSSSCG00000003582
6	85085030	85093156	XKR8	ENSSSCG00000030623
6	85095413	85185861	EYA3	ENSSSCG00000003580
8	38982680	39060713	DCUN1D4	ENSSSCG00000008831
8	39104074	39126800	LRRC66	ENSSSCG00000008832
8	39126925	39141517	SGCB	ENSSSCG00000008833
8	39148874	39203956	SPATA18	ENSSSCG00000008834
8	48354058	48354631		ENSSSCG00000037727
8	51972277	52012788	NAF1	ENSSSCG00000008887
8	55336005	55598257	KIAA1211	ENSSSCG00000008903
8	65381061	65489092	UBA6	ENSSSCG00000008924
8	65474819	65500864		ENSSSCG00000034007
8	65493156	65561989		ENSSSCG00000029658
8	65498204	65498822		ENSSSCG00000030310
8	66412150	66640734		ENSSSCG00000034442
8	67706874	68177218	SLC4A4	ENSSSCG00000008943
8	68326287	68364937	GC	ENSSSCG00000027609
8	69274028	69354896	COX18	ENSSSCG00000008947
8	69361213	69531286	ANKRD17	ENSSSCG00000024592
8	69531487	69681699	ALB	ENSSSCG00000008948
12	14507846	14572477	CEP95	ENSSSCG00000028925
12	14571687	14582970	DDX5	ENSSSCG00000032092
12	14577665	14577765		ENSSSCG00000040685
12	14578144	14578209	MIR3064	ENSSSCG00000035742
12	14582544	14601538	POLG2	ENSSSCG00000036057
1	1495818	1521666		ENSSSCG00000004017
1	1527530	1537814	KIF25	ENSSSCG00000004016
1	25480923	25565277	REPS1	ENSSSCG00000004146
1	42541796	42545383		ENSSSCG00000004243
1	52435434	52435826		ENSSSCG00000033341
1	95498733	95603018	EPG5	ENSSSCG00000021072
1	95625801	95727801	PSTPIP2	ENSSSCG00000004497
1	266933532	267105789	MVB12B	ENSSSCG00000036926
1	266995347	266995453	U6	ENSSSCG00000040052
2	12802630	12803603		ENSSSCG00000040200
2	12843402	12844358	OR10Q1	ENSSSCG00000037952
2	12854653	12855690		ENSSSCG00000031718
2	12865950	12866891		ENSSSCG00000035545
2	12878051	12878983	OR9Q1	ENSSSCG00000031726
2	12928006	12928940		ENSSSCG00000036193
2	12951936	12952874	OR9I1	ENSSSCG00000035278
2	12988754	12990030		ENSSSCG00000032557
2	12992797	12993746		ENSSSCG00000013170
2	41933429	42022209	PIK3C2A	ENSSSCG00000025406
2	113822532	114206930	FER	ENSSSCG00000027074
2	119304484	119352465	TRIM36	ENSSSCG00000014214
2	119386053	119440325	PGGT1B	ENSSSCG00000014215
2	119444287	119459542	CCDC112	ENSSSCG00000029866
3	13565750	14465935		ENSSSCG00000035984
3	14087562	14088350		ENSSSCG00000036945
3	27685452	27685569	5S_rRNA	ENSSSCG00000019735
3	28964754	29239741	MKL2	ENSSSCG00000039171
3	106822395	106999390	TTC27	ENSSSCG00000008512
3	129798854	129800197	SOX11	ENSSSCG00000008649
4	12192698	12192811	PVT1_6	ENSSSCG00000040011
4	12596051	12631394		ENSSSCG00000033717
4	13445378	13451327	FAM84B	ENSSSCG00000005967
4	89931886	89979897		ENSSSCG00000039632
4	89932340	89969665	CD84	ENSSSCG00000006381
4	89980780	90003645		ENSSSCG00000006382
4	119931393	120712461	DPYD	ENSSSCG00000006878
4	129476422	129804203	ODF2L	ENSSSCG00000006936
4	129668254	129705211	CLCA2	ENSSSCG00000006935
5	14720120	14755815	C12orf75	ENSSSCG00000031661
5	15049830	15070225		ENSSSCG00000035856
5	15058089	15084043		ENSSSCG00000000191
5	15093609	15097764	RHEBL1	ENSSSCG00000000186
5	15114527	15119577	DHH	ENSSSCG00000000188
5	15119638	15135704	LMBR1L	ENSSSCG00000000189
5	15150224	15190862	TUBA1B	ENSSSCG00000000190
5	15153184	15270100		ENSSSCG00000000194
5	15199872	15200149		ENSSSCG00000039949
5	15711253	15761537	NCKAP5L	ENSSSCG00000000209
5	15750504	15761536	BCDIN3D	ENSSSCG00000040144
5	15774938	15775449		ENSSSCG00000000207
5	15779334	15813034	FAIM2	ENSSSCG00000000206
5	16038921	16070076	CERS5	ENSSSCG00000024932
5	16056486	16056611		ENSSSCG00000038103
5	16071925	16177130	LIMA1	ENSSSCG00000032269
5	16233993	16279903		ENSSSCG00000026061
5	16284949	16353555	LARP4	ENSSSCG00000028516
5	16842280	16977611	SLC4A8	ENSSSCG00000028060
5	16977701	17169541	SCN8A	ENSSSCG00000000228
5	17167275	17167493		ENSSSCG00000037693
5	17181436	17182743	FIGNL2	ENSSSCG00000033660
5	18293254	18353113	SPRYD3	ENSSSCG00000000262
5	18353171	18357225	IGFBP6	ENSSSCG00000000261
5	18358673	18374288	SOAT2	ENSSSCG00000000260
5	18379344	18410396	CSAD	ENSSSCG00000000259
5	18409397	18418986	ZNF740	ENSSSCG00000036564
5	18417198	18434526	ITGB7	ENSSSCG00000000257
5	18436268	18458624	RARG	ENSSSCG00000000258
5	18476366	18478737	MFSD5	ENSSSCG00000000264
5	18487563	18509753	ESPL1	ENSSSCG00000000265
5	26391833	26552119	FAM19A2	ENSSSCG00000034686
5	26964788	27083336	USP15	ENSSSCG00000000457
5	27126040	27241940	MON2	ENSSSCG00000000458
5	27252802	27252886	ssc-let-7i	ENSSSCG00000019827
5	27299778	27572618	PPM1H	ENSSSCG00000036751
5	29025549	29113891	RASSF3	ENSSSCG00000039060
5	29128756	29190331	GNS	ENSSSCG00000023715
5	61144284	61145234	TAS2R42	ENSSSCG00000032322
5	61160149	61163287		ENSSSCG00000037609
5	61162905	61163111		ENSSSCG00000038603
5	61181192	61182244		ENSSSCG00000038461
5	61242636	61243565	TAS2R10	ENSSSCG00000038925
5	61253928	61254863	TAS2R9	ENSSSCG00000000631
5	61262331	61263269	TAS2R7	ENSSSCG00000035471
5	61324894	61325000	U6	ENSSSCG00000033705
5	61337862	61361282	YBX3	ENSSSCG00000000633
5	61402731	61417472	STYK1	ENSSSCG00000000634
5	61425829	61433947		ENSSSCG00000000635
5	61441125	61457839		ENSSSCG00000000636
5	69778622	69841781	BCL2L13	ENSSSCG00000040373
5	69849002	69875853	BID	ENSSSCG00000000769
5	69890145	69985424	MICAL3	ENSSSCG00000000770
5	70394576	70659819	CPNE8	ENSSSCG00000000778
5	72168532	72495728	CNTN1	ENSSSCG00000000789
5	72787914	72940818	PDZRN4	ENSSSCG00000000791
5	73898262	73947405		ENSSSCG00000039286
5	73920425	73920765	7SK	ENSSSCG00000027887
5	91150317	91150423	5S_rRNA	ENSSSCG00000019326
5	91678608	91713925	DCN	ENSSSCG00000000915
5	92936006	93061412	ATP2B1	ENSSSCG00000027898
5	100270239	100429204	ACSS3	ENSSSCG00000000939
5	101871314	102394307	SYT1	ENSSSCG00000000948
6	4806014	5684863	CDH13	ENSSSCG00000002684
6	19278391	19279214		ENSSSCG00000040078
6	19296637	19302737	CCL22	ENSSSCG00000002821
6	19312447	19324088	CX3CL1	ENSSSCG00000024759
6	19345764	19348965	CCL17	ENSSSCG00000023852
6	19356589	19373812	CIAPIN1	ENSSSCG00000029519
6	19373047	19390735	COQ9	ENSSSCG00000025284
6	19379525	19379823	Metazoa_SRP	ENSSSCG00000024387
6	19393564	19402212	POLR2C	ENSSSCG00000025454
6	47951925	47953282	IL28B	ENSSSCG00000040814
6	47972099	47978430	LRFN1	ENSSSCG00000032407
6	47986147	47997228	GMFG	ENSSSCG00000040981
6	47991410	47991515	U6	ENSSSCG00000019381
6	48018184	48045767		ENSSSCG00000010706
6	48046497	48054189	PAF1	ENSSSCG00000022442
6	48102456	48124845	SUPT5H	ENSSSCG00000023556
6	48127014	48134086	TIMM50	ENSSSCG00000026612
6	48147834	48154909	DLL3	ENSSSCG00000002987
6	48162428	48167437	SELENOV	ENSSSCG00000002986
6	48184566	48185185	EID2	ENSSSCG00000024773
6	54701672	54707124	IRF3	ENSSSCG00000003178
6	54707237	54714132	BCL2L12	ENSSSCG00000003177
6	54718843	54732570	PRMT1	ENSSSCG00000003189
6	54731557	54748750	ADM5	ENSSSCG00000032629
6	54732826	54749248	CPT1C	ENSSSCG00000024872
6	59860495	59868085		ENSSSCG00000003303
6	59878673	59878743	SNORD34	ENSSSCG00000020299
6	59915643	59931611	HELZ2	ENSSSCG00000003306
6	59949004	59973856	NLRP9	ENSSSCG00000003307
6	60061358	60063950		ENSSSCG00000039067
6	60075986	60077406		ENSSSCG00000031667
6	60082261	60083002		ENSSSCG00000003311
6	60098895	60100014		ENSSSCG00000032895
6	60173139	60217552	NLRP11	ENSSSCG00000003314
6	60287201	60337958	NLRP13	ENSSSCG00000024227
6	60350622	60375307	NLRP8	ENSSSCG00000003315
6	60381491	60381740		ENSSSCG00000031929
6	60403403	60412523		ENSSSCG00000028861
6	60422391	60446188	ZNF787	ENSSSCG00000003317
6	60457830	60471145	ZNF444	ENSSSCG00000035770
6	60476326	60506579		ENSSSCG00000034183
6	60487517	60493138	GALP	ENSSSCG00000003318
6	60511110	60511448		ENSSSCG00000034600
6	60520803	60521141		ENSSSCG00000037756
6	60594907	60596016		ENSSSCG00000032606
6	60638779	60665393	ZNF667	ENSSSCG00000024622
6	60685337	60688631		ENSSSCG00000024113
6	60685364	60757894		ENSSSCG00000032086
6	60721485	60750617	ZNF582	ENSSSCG00000003322
6	60759168	60773371		ENSSSCG00000026045
6	60784524	60804616		ENSSSCG00000003324
6	60791566	60791956		ENSSSCG00000035614
6	60817461	60844444		ENSSSCG00000035252
6	60857066	60881008	ZNF71	ENSSSCG00000026141
6	60890688	60900884	ZNF470	ENSSSCG00000039914
6	60904998	60927200	ZFP28	ENSSSCG00000027774
6	60934781	60940662	ZNF835	ENSSSCG00000040067
6	60963992	60964957		ENSSSCG00000028467
6	60973562	60974110		ENSSSCG00000037768
6	60984603	60985538		ENSSSCG00000036167
6	60991371	60992342		ENSSSCG00000039565
6	61000864	61001799		ENSSSCG00000033565
6	61007742	61008677		ENSSSCG00000035329
6	61014632	61015573		ENSSSCG00000022529
6	61045941	61046846		ENSSSCG00000028128
6	61159297	61182477		ENSSSCG00000032669
6	61202482	61274232		ENSSSCG00000036306
6	61249550	61259495		ENSSSCG00000003325
6	61283952	61307765		ENSSSCG00000003326
6	61307944	61308026	MIMT1_1	ENSSSCG00000040601
6	61308456	61489219		ENSSSCG00000035785
6	61314916	61315051		ENSSSCG00000031574
6	61516685	61519361	USP29	ENSSSCG00000033319
6	61525269	61531780	ZIM3	ENSSSCG00000035575
6	62935423	63320640	A1BG	ENSSSCG00000004001
6	63289455	63311243	SAMD11	ENSSSCG00000033509
6	63305465	63320751	NOC2L	ENSSSCG00000023973
6	63322190	63336139	KLHL17	ENSSSCG00000030000
6	63328054	63339777	PLEKHN1	ENSSSCG00000030505
6	63335440	63341947	PERM1	ENSSSCG00000033735
6	63351598	63356478	HES4	ENSSSCG00000035420
6	63362889	63365398	ISG15	ENSSSCG00000040575
6	63365988	63398724	AGRN	ENSSSCG00000022204
6	63656119	63658000	AURKAIP1	ENSSSCG00000038474
6	63657729	63668056	CCNL2	ENSSSCG00000003354
6	63668254	63675712	MRPL20	ENSSSCG00000033374
6	63675164	63677258		ENSSSCG00000035994
6	63680993	63682758	ANKRD65	ENSSSCG00000003346
6	63686853	63691516	TMEM88B	ENSSSCG00000034013
6	63695170	63700287	VWA1	ENSSSCG00000003344
6	63706116	63722384		ENSSSCG00000003343
6	63720120	63727588	TMEM240	ENSSSCG00000038530
6	63727680	63755198		ENSSSCG00000003348
6	63737671	63737967	7SK	ENSSSCG00000019097
6	64188029	64242593	SKI	ENSSSCG00000040944
6	64254908	64302801	MORN1	ENSSSCG00000028706
6	64804366	64804719		ENSSSCG00000037480
6	68957283	69211169	RERE	ENSSSCG00000033497
6	71583818	71640940	DISP3	ENSSSCG00000003417
6	76064142	76230107	ARHGEF10L	ENSSSCG00000003486
6	77374001	77404015	ALDH4A1	ENSSSCG00000024752
6	77410697	77456290		ENSSSCG00000022839
6	77747561	77757721	MRTO4	ENSSSCG00000034814
6	77754173	77761667	AKR7A2	ENSSSCG00000003491
6	77760752	77778577	PQLC2	ENSSSCG00000003492
6	77780682	77913339	CAPZB	ENSSSCG00000003493
6	77928051	77928981		ENSSSCG00000014938
6	78011542	78045913		ENSSSCG00000028414
6	78045818	78046074		ENSSSCG00000034033
6	78059392	78071604		ENSSSCG00000024669
6	78077847	78091581	HTR6	ENSSSCG00000025244
6	78094370	78169738	TMCO4	ENSSSCG00000027489
6	78197831	78198510	RNF186	ENSSSCG00000035365
6	78241624	78273539	OTUD3	ENSSSCG00000039652
6	78747691	78758805	MUL1	ENSSSCG00000028045
6	78788545	78794367	FAM43B	ENSSSCG00000030706
6	78788773	78789207		ENSSSCG00000031559
6	78824248	78849547	CDA	ENSSSCG00000021259
6	78863289	78886692	PINK1	ENSSSCG00000003506
6	78885268	78895853	DDOST	ENSSSCG00000003505
6	78898383	78952925	KIF17	ENSSSCG00000003508
6	78953362	78967384	SH2D5	ENSSSCG00000003509
6	78975510	79007994	HP1BP3	ENSSSCG00000003511
6	79022021	79286820	EIF4G3	ENSSSCG00000003512
6	79410669	79466047	ECE1	ENSSSCG00000003513
6	79589691	79649644	ALPL	ENSSSCG00000032607
6	79662137	79735361	RAP1GAP	ENSSSCG00000022029
6	79744936	79810724	USP48	ENSSSCG00000024197
6	80035048	80090934	CDC42	ENSSSCG00000003520
6	80068259	80088564		ENSSSCG00000035899
6	80112277	80139670		ENSSSCG00000003521
6	80521572	80548696	EPHA8	ENSSSCG00000003523
6	80586183	80591269	C1QA	ENSSSCG00000003524
6	80592198	80599440	C1QC	ENSSSCG00000038706
6	80601303	80608011	C1QB	ENSSSCG00000033512
6	80649143	80843567	EPHB2	ENSSSCG00000003527
6	80903358	80973632	KDM1A	ENSSSCG00000003531
6	80973261	81112327	LUZP1	ENSSSCG00000003532
6	81089662	81112347	HTR1D	ENSSSCG00000025500
6	81196062	81239387	HNRNPR	ENSSSCG00000023761
6	81250123	81261853	ZNF436	ENSSSCG00000035332
6	81268514	81304581	TCEA3	ENSSSCG00000032674
6	81422546	81424169	ID3	ENSSSCG00000039514
6	81566801	81582028		ENSSSCG00000025440
6	81590951	81598872	PITHD1	ENSSSCG00000023495
6	81601486	81605912	LYPLA2	ENSSSCG00000023191
6	81605918	81630365	GALE	ENSSSCG00000027827
6	81610427	81630470	HMGCL	ENSSSCG00000026025
6	81637698	81723231	FUCA1	ENSSSCG00000027659
6	81659186	81692550	CNR2	ENSSSCG00000027849
6	81706663	81741526	SRSF10	ENSSSCG00000036293
6	81722026	81726489	PNRC2	ENSSSCG00000023326
6	81799570	81903971	MYOM3	ENSSSCG00000036534
6	81867848	81885589	IL22RA1	ENSSSCG00000038848
6	81892890	81914142	IFNLR1	ENSSSCG00000032860
6	82013992	82051066	GRHL3	ENSSSCG00000003539
6	82053705	82102928	STPG1	ENSSSCG00000003541
6	82111641	82198909	NIPAL3	ENSSSCG00000003543
6	82186310	82226131	RCAN3	ENSSSCG00000024818
6	82212592	82212697	U6	ENSSSCG00000019303
6	82275777	82280957	NCMAP	ENSSSCG00000003547
6	82286211	82345834	SRRM1	ENSSSCG00000032947
6	82298535	82298936		ENSSSCG00000003546
6	96265764	96266657	MC2R	ENSSSCG00000039227
6	96322422	96323387	MC5R	ENSSSCG00000028411
6	96342914	96360169	RNMT	ENSSSCG00000025855
6	96384381	96393999	FAM210A	ENSSSCG00000030438
6	96401652	96577621	LDLRAD4	ENSSSCG00000027417
6	96770225	96847128		ENSSSCG00000021738
6	96877429	96893434		ENSSSCG00000031730
6	96893571	96912389		ENSSSCG00000027007
6	96934265	97114587	SPIRE1	ENSSSCG00000039769
6	97883894	97948747		ENSSSCG00000021899
6	97958219	97975143	NAPG	ENSSSCG00000038533
6	97992233	98027373	APCDD1	ENSSSCG00000039797
6	99062352	99178054	MTCL1	ENSSSCG00000003684
6	105201146	105201334	U2	ENSSSCG00000018323
6	130153377	130153483	U6	ENSSSCG00000035517
6	130600007	130600114		ENSSSCG00000032958
6	131727085	132365891	ADGRL2	ENSSSCG00000003761
6	132570837	132570994		ENSSSCG00000031548
6	141959397	142159718	PTGER3	ENSSSCG00000003788
6	149562742	149563175		ENSSSCG00000034748
6	158338599	158366188	HSPB11	ENSSSCG00000026264
6	158352331	158376286		ENSSSCG00000037689
6	158375602	158392783	DIO1	ENSSSCG00000028896
6	158403258	158445513	YIPF1	ENSSSCG00000028506
6	158458570	158512371	NDC1	ENSSSCG00000028748
6	158797088	158803006	DMRTB1	ENSSSCG00000003847
6	158798205	158982381	LRP8	ENSSSCG00000003848
7	13498222	13717603	KIF13A	ENSSSCG00000020858
7	13579544	13582658		ENSSSCG00000036241
7	15532073	15643988	MBOAT1	ENSSSCG00000001078
7	15793995	15870059	E2F3	ENSSSCG00000040178
7	15910494	16674989	CDKAL1	ENSSSCG00000001080
7	19488920	19502546	TDP2	ENSSSCG00000001092
7	19502552	19519820	ACOT13	ENSSSCG00000036411
7	19509689	19524895	C6orf62	ENSSSCG00000038752
7	19520081	19524321		ENSSSCG00000040906
7	19585946	19595344	GMNN	ENSSSCG00000001095
7	19587685	19838096	RIPOR2	ENSSSCG00000001097
7	19599099	19601900	C6orf229	ENSSSCG00000001096
7	22093092	22101837		ENSSSCG00000001204
7	22108647	22110123	NKAPL	ENSSSCG00000001205
7	22114800	22133148	ZSCAN26	ENSSSCG00000001206
7	22121180	22126823		ENSSSCG00000040938
7	22134995	22155657	PGBD1	ENSSSCG00000001207
7	22173468	22181176	ZSCAN31	ENSSSCG00000025335
7	22189821	22208745	ZSCAN12	ENSSSCG00000001209
7	22289114	22301521	GPX5	ENSSSCG00000001214
7	22316447	22332344		ENSSSCG00000001216
7	32032485	32054703	C6orf222	ENSSSCG00000001560
7	32087432	32108185	ETV7	ENSSSCG00000001561
7	32110530	32125098	PXT1	ENSSSCG00000036420
7	32115084	32195072	KCTD20	ENSSSCG00000001562
7	32206534	32253679	STK38	ENSSSCG00000001563
7	32282457	32310904		ENSSSCG00000035219
7	32289460	32302716		ENSSSCG00000001564
7	32359455	32362271	CDKN1A	ENSSSCG00000001565
7	32372459	32401798	RAB44	ENSSSCG00000001566
7	32398573	32508361	CPNE5	ENSSSCG00000001567
7	32405435	32406583		ENSSSCG00000036130
7	45450936	45925155	PKHD1	ENSSSCG00000001746
7	45534405	45535006		ENSSSCG00000039768
7	47481539	47529187	IREB2	ENSSSCG00000001756
7	47839079	47929092	TBC1D2B	ENSSSCG00000027477
7	47929033	47994484	ADAMTS7	ENSSSCG00000001765
7	48050045	48075796	MORF4L1	ENSSSCG00000001769
7	48083572	48106074	CTSH	ENSSSCG00000001770
7	48118209	48246288	RASGRF1	ENSSSCG00000001771
7	85613437	85629935		ENSSSCG00000038216
7	85679666	85715208		ENSSSCG00000034247
7	86269052	86289228	FAM174B	ENSSSCG00000002265
7	86777922	87103823	SLCO3A1	ENSSSCG00000002263
7	87568016	87766913	SV2B	ENSSSCG00000002262
7	87783550	87784111		ENSSSCG00000002261
7	88105684	88219075		ENSSSCG00000002259
7	91184610	91185112	TMEM229B	ENSSSCG00000023791
7	91231631	91245669		ENSSSCG00000036829
7	92403574	92403930	7SK	ENSSSCG00000018485
7	92407506	92412117		ENSSSCG00000034839
7	92488010	92495427	ZFP36L1	ENSSSCG00000028304
7	93253722	93344188	SUSD6	ENSSSCG00000002311
7	93324366	93421776	SLC10A1	ENSSSCG00000002313
7	93393360	93447648	SRSF5	ENSSSCG00000032583
7	93643618	93796801	SLC8A3	ENSSSCG00000002315
7	93861142	93882359	COX16	ENSSSCG00000002316
7	93896210	93898402		ENSSSCG00000002317
7	93908967	93974366	SYNJ2BP	ENSSSCG00000026389
7	93947289	93949505		ENSSSCG00000040955
7	94014154	94016388		ENSSSCG00000002326
7	94025655	94030695		ENSSSCG00000002321
7	94084810	94086963	ADAM21	ENSSSCG00000002322
7	94127694	94129907	ADAM20	ENSSSCG00000034126
7	94157622	94184551	MED6	ENSSSCG00000034290
7	94157732	94163433		ENSSSCG00000037679
7	94218649	94254730	TTC9	ENSSSCG00000020701
7	94790539	95171117	SIPA1L1	ENSSSCG00000002332
7	112268301	112519208	TTC7B	ENSSSCG00000002436
7	113197964	113293597	CATSPERB	ENSSSCG00000002442
7	113337825	113392337	TC2N	ENSSSCG00000002443
7	113836230	114014949	SLC24A4	ENSSSCG00000002450
7	114035383	114541592	RIN3	ENSSSCG00000002451
7	114128023	114128086	SNORD77	ENSSSCG00000039831
7	114175183	114217319	LGMN	ENSSSCG00000002452
7	114574139	114575889	TMEM251	ENSSSCG00000002458
7	114586306	114590804	GON7	ENSSSCG00000002459
7	114590945	114612481	UBR7	ENSSSCG00000002460
7	114619396	114707051	BTBD7	ENSSSCG00000002461
7	114727655	114729235	COX8C	ENSSSCG00000002462
8	20456243	20609281		ENSSSCG00000008762
8	20592121	20609036		ENSSSCG00000032413
8	27771337	28100520	ARAP2	ENSSSCG00000008768
8	30024830	30060982	KLF3	ENSSSCG00000036488
8	30026788	30027255		ENSSSCG00000035208
8	30463781	30553703	WDR19	ENSSSCG00000008789
8	31809830	31918084	NSUN7	ENSSSCG00000024496
8	48020695	48277458	RAPGEF2	ENSSSCG00000008881
8	66763052	66786534		ENSSSCG00000039518
8	84567221	84601054	USP38	ENSSSCG00000009049
8	85668366	85678374	IL15	ENSSSCG00000009051
8	87478520	87527189	SETD7	ENSSSCG00000030396
8	87545116	87570545	RAB33B	ENSSSCG00000020711
8	88608030	88734637	SLC7A11	ENSSSCG00000022649
8	90839817	90840150		ENSSSCG00000037741
8	93940060	93940690		ENSSSCG00000036969
8	95894176	95949421		ENSSSCG00000009069
8	96751303	96856344		ENSSSCG00000034280
8	96890147	96916015	ABHD18	ENSSSCG00000009074
8	96929890	96970451	MFSD8	ENSSSCG00000009075
8	96961578	97089996	HSPA4L	ENSSSCG00000009077
8	97068135	97068227	ZNFX1-AS1_2	ENSSSCG00000031183
8	97096224	97120827	SLC25A31	ENSSSCG00000009078
8	97123064	97204659	INTU	ENSSSCG00000009079
8	99782806	99828653	ANKRD50	ENSSSCG00000022173
8	100016281	100016615		ENSSSCG00000032258
8	101138023	101241099	SPATA5	ENSSSCG00000009084
8	101737599	101937111	KIAA1109	ENSSSCG00000009090
8	102129037	102206946	TRPC3	ENSSSCG00000009092
8	102213138	102266309	BBS7	ENSSSCG00000009093
8	102264470	102303842	EXOSC9	ENSSSCG00000009096
8	102294319	102294425	U6	ENSSSCG00000033274
8	102327133	102328800		ENSSSCG00000031558
8	102387828	102421352	ANXA5	ENSSSCG00000009097
8	102957352	102995268	TNIP3	ENSSSCG00000009100
8	103028687	103032398		ENSSSCG00000035060
8	103047238	103090045	NDNF	ENSSSCG00000029260
8	103189313	103381913	PRDM5	ENSSSCG00000009101
8	103293637	103293740	U6	ENSSSCG00000019649
8	104270893	104420953	PDE5A	ENSSSCG00000009106
8	104434878	104435036		ENSSSCG00000033754
8	104464044	104471343	FABP2	ENSSSCG00000037272
8	104494157	104497289		ENSSSCG00000031773
8	104498713	104560640	USP53	ENSSSCG00000023174
8	105219093	105370067	NDST3	ENSSSCG00000009115
8	116158074	116334013		ENSSSCG00000022788
8	116415272	116545514	TET2	ENSSSCG00000009157
8	117661792	117721591	TACR3	ENSSSCG00000009160
8	117888970	117965792	CENPE	ENSSSCG00000023296
8	117996843	118079194	SLC9B2	ENSSSCG00000028101
8	118052500	118128281		ENSSSCG00000009162
8	118152701	118164654	CISD2	ENSSSCG00000009164
8	121225473	121251574	ADH4	ENSSSCG00000009184
8	121266764	121282310	ADH5	ENSSSCG00000009185
8	121291848	121352515	METAP1	ENSSSCG00000009186
8	121409716	121466897	EIF4E	ENSSSCG00000028420
8	121427999	121452085		ENSSSCG00000036313
8	138065470	138065574	U6	ENSSSCG00000020131
9	12313482	12432126		ENSSSCG00000014884
9	12442414	12451687		ENSSSCG00000031979
9	12479594	12485139	THRSP	ENSSSCG00000033822
9	12485886	12492520	NDUFC2	ENSSSCG00000039494
9	12499772	12532378	ALG8	ENSSSCG00000014887
9	13045272	13282261	TENM4	ENSSSCG00000014894
9	17576151	18495897	DLG2	ENSSSCG00000014904
9	21712712	21712746		ENSSSCG00000038293
9	21726570	21761760	CTSC	ENSSSCG00000014924
9	21734055	21781238		ENSSSCG00000038831
9	21918736	22438208	GRM5	ENSSSCG00000029865
9	23061453	23062667		ENSSSCG00000014929
9	23080378	23087916		ENSSSCG00000024966
9	23110277	23164144	NAALAD2	ENSSSCG00000014933
9	23183802	23209543	CHORDC1	ENSSSCG00000014934
9	26648086	26669961	C11orf97	ENSSSCG00000014957
9	26680274	26682701	FUT4	ENSSSCG00000014958
9	26703539	26752001	PIWIL4	ENSSSCG00000014959
9	28375047	28407374	CCDC82	ENSSSCG00000014972
9	28406863	28407200		ENSSSCG00000039752
9	28407434	28412041	JRKL	ENSSSCG00000034924
9	32348438	32439187	TRPC6	ENSSSCG00000024022
9	78611367	78611520	U1	ENSSSCG00000020167
9	78653608	79836589	NXPH1	ENSSSCG00000037207
9	85423951	85711528	ISPD	ENSSSCG00000015358
9	85743256	85748158	SOSTDC1	ENSSSCG00000021126
9	85804153	85844660	LRRC72	ENSSSCG00000015361
9	85850647	85887485	ANKMY2	ENSSSCG00000015360
9	85886158	85947430	BZW2	ENSSSCG00000023118
9	102199673	102348751	PHTF2	ENSSSCG00000015410
9	102349016	102354639	TMEM60	ENSSSCG00000038541
9	102363944	102435215	RSBN1L	ENSSSCG00000038977
9	102435376	102455903		ENSSSCG00000031818
9	102444111	102444240	SNORA11	ENSSSCG00000038698
9	102480918	102564148	PTPN12	ENSSSCG00000015411
9	113835357	113875895	ADORA1	ENSSSCG00000021059
9	113873490	113895024	MYBPH	ENSSSCG00000030681
9	113882214	113895510	CHI3L1	ENSSSCG00000015476
9	113927720	113941433	CHIT1	ENSSSCG00000015477
9	113973268	114067553	PRRC2C	ENSSSCG00000015480
9	138990704	139016780	VSTM2A	ENSSSCG00000015636
9	139128296	139135405	SEC61G	ENSSSCG00000035434
11	15977286	15977945	CCDC70	ENSSSCG00000009383
11	16047607	16086572	DHRS12	ENSSSCG00000033483
11	16078058	16301828		ENSSSCG00000040538
11	32494290	32994840	DIAPH3	ENSSSCG00000009448
11	44839470	44839638	uc_338	ENSSSCG00000035970
11	44897445	44898508		ENSSSCG00000009458
11	56508751	56522599	SLITRK6	ENSSSCG00000009486
11	66679193	66720045	RAP2A	ENSSSCG00000039812
11	67458352	67565647	STK24	ENSSSCG00000009511
11	68408371	68469947	TM9SF2	ENSSSCG00000031808
11	68460859	68460965	U6	ENSSSCG00000037423
11	68507809	68765591	CLYBL	ENSSSCG00000009519
11	70252397	70422164	FGF14	ENSSSCG00000009527
11	73285975	73286168	DAOA-AS1_1	ENSSSCG00000033867
11	73289686	73289886	DAOA-AS1_2	ENSSSCG00000037113
12	17252020	17306275		ENSSSCG00000017313
12	17289361	17293502		ENSSSCG00000031204
12	27093233	27100483	WFIKKN2	ENSSSCG00000017557
12	27115824	27119928	TOB1	ENSSSCG00000040773
12	27198946	27425463	SPAG9	ENSSSCG00000033228
12	31206680	31272764	TOM1L1	ENSSSCG00000017601
12	31267742	31267812		ENSSSCG00000040312
12	31267884	31277855	COX11	ENSSSCG00000031433
12	31298157	31469457	STXBP4	ENSSSCG00000017602
12	44402995	44553518	NLK	ENSSSCG00000017756
12	44896789	44907103	SDF2	ENSSSCG00000017772
12	44906847	44940742	SUPT6H	ENSSSCG00000017773
12	44916745	44916905		ENSSSCG00000036782
12	44941373	44949188	PROCA1	ENSSSCG00000017770
12	44949476	44956119	RAB34	ENSSSCG00000017769
12	44957152	44962723		ENSSSCG00000035080
12	44957658	44957724	SNORD42	ENSSSCG00000019783
12	44959453	44962999	TLCD1	ENSSSCG00000038650
12	44959554	44959625	snoZ17	ENSSSCG00000020020
12	44960228	44960299	SNORD42	ENSSSCG00000038123
12	44960488	44960564	snoZ17	ENSSSCG00000027915
12	44965187	44975613	NEK8	ENSSSCG00000017766
12	44975647	44985746	TRAF4	ENSSSCG00000032658
12	44985699	44985800	U6	ENSSSCG00000020350
12	44986178	45076178	FAM222B	ENSSSCG00000039321
12	45597002	45744809	TAOK1	ENSSSCG00000017790
12	56896838	56915518		ENSSSCG00000038836
12	56931150	57029258	MYOCD	ENSSSCG00000031988
12	60750091	60854790	RAI1	ENSSSCG00000038164
12	60892688	60919279	PEMT	ENSSSCG00000018055
12	60922422	60926283	RASD1	ENSSSCG00000034044
12	60925162	60934004	MED9	ENSSSCG00000018053
12	61273943	61308353	USP22	ENSSSCG00000035671
12	61320760	61347538	DHRS7B	ENSSSCG00000031802
12	61350803	61363583	TMEM11	ENSSSCG00000034040
12	61368878	61378907	NATD1	ENSSSCG00000033762
12	61376916	61421579	MAP2K3	ENSSSCG00000034379
13	15320292	15324674		ENSSSCG00000039728
13	18243374	18350381	CMTM8	ENSSSCG00000022618
13	18371985	18424129		ENSSSCG00000011234
13	18464104	18485450	CMTM6	ENSSSCG00000038362
13	23481999	23570379	SCN10A	ENSSSCG00000011260
13	23483005	23485925		ENSSSCG00000034667
13	24382668	24554630	MYRIP	ENSSSCG00000011269
13	24574910	24577591	EIF1B	ENSSSCG00000011270
13	25138284	25138560		ENSSSCG00000034115
13	25159603	25208313	CTNNB1	ENSSSCG00000011274
13	25210498	25751513	ULK4	ENSSSCG00000025408
13	25321495	25321597	U6	ENSSSCG00000018451
13	27647870	27703546	TCAIM	ENSSSCG00000031304
13	27748438	27783513	ZNF445	ENSSSCG00000024556
13	27779158	27821395		ENSSSCG00000032596
13	27839195	27854302		ENSSSCG00000022195
13	27867535	27868838	ZNF660	ENSSSCG00000011310
13	27875474	27901238	ZNF197	ENSSSCG00000011304
13	27897518	27917788	ZNF35	ENSSSCG00000032080
13	27930928	27944375	ZNF502	ENSSSCG00000011306
13	27940364	27944375		ENSSSCG00000032507
13	27949670	27955035	ZNF501	ENSSSCG00000011307
13	27955217	27966593	KIAA1143	ENSSSCG00000032344
13	27966742	28043177	KIF15	ENSSSCG00000011309
13	28045346	28053157	TMEM42	ENSSSCG00000031576
13	28098007	28219535	ZDHHC3	ENSSSCG00000011301
13	28151111	28209334	EXOSC7	ENSSSCG00000011300
13	28176793	28229719	CLEC3B	ENSSSCG00000011299
13	28257417	28319243	CDCP1	ENSSSCG00000011298
13	28524805	28692328	LARS2	ENSSSCG00000011312
13	28730192	28811615	LIMD1	ENSSSCG00000011313
13	28817244	28892013	SACM1L	ENSSSCG00000027176
13	42628322	42628430	5S_rRNA	ENSSSCG00000019903
13	46897427	47160117	MAGI1	ENSSSCG00000011497
13	48650866	49090696	SUCLG2	ENSSSCG00000011501
13	50147905	50353410	FAM19A4	ENSSSCG00000033199
13	51629377	51742671	MDFIC2	ENSSSCG00000040266
13	51813063	51813556		ENSSSCG00000036126
13	52175665	52263769		ENSSSCG00000036165
13	52348094	52974267	FOXP1	ENSSSCG00000027675
13	52928740	52928857		ENSSSCG00000019661
13	53083645	53152333	EIF4E3	ENSSSCG00000011516
13	53152062	53153192	GPR27	ENSSSCG00000036580
13	53170525	53184664	PROK2	ENSSSCG00000026200
13	54073726	54180746	SHQ1	ENSSSCG00000011518
13	54225345	54297366	GXYLT2	ENSSSCG00000011519
13	54414796	54415547		ENSSSCG00000032209
13	54659589	54707478	PDZRN3	ENSSSCG00000011521
13	54881130	54903980		ENSSSCG00000039134
13	55648514	56019207	CNTN3	ENSSSCG00000011522
13	55667728	55667834	U6	ENSSSCG00000037943
13	56804304	57034184	CHL1	ENSSSCG00000011524
13	57842302	58014806	CNTN6	ENSSSCG00000038152
13	58447107	58447213	U6	ENSSSCG00000018941
13	59310665	59639576	CNTN4	ENSSSCG00000011527
13	59652755	59690184	IL5RA	ENSSSCG00000011528
13	59711013	59735400	TRNT1	ENSSSCG00000011529
13	59733513	59757706	CRBN	ENSSSCG00000011530
13	59736393	59736583	U2	ENSSSCG00000028732
13	65869652	65919781	LHFPL4	ENSSSCG00000011543
13	65948479	66039153	MTMR14	ENSSSCG00000011546
13	66021325	66037445	BRPF1	ENSSSCG00000011548
13	66034700	66044558	OGG1	ENSSSCG00000011549
13	66043142	66055295	CAMK1	ENSSSCG00000011550
13	66068002	66080479	TADA3	ENSSSCG00000011551
13	66079815	66108968	ARPC4	ENSSSCG00000011552
13	66095847	66123977		ENSSSCG00000011553
13	66126124	66134072	RPUSD3	ENSSSCG00000011555
13	66141206	66149851	CIDEC	ENSSSCG00000011557
13	66155766	66157838	JAGN1	ENSSSCG00000032623
13	66166273	66177967		ENSSSCG00000011556
13	66179298	66194619	IL17RC	ENSSSCG00000011559
13	66195464	66202958	CRELD1	ENSSSCG00000011560
13	66199666	66211628	PRRT3	ENSSSCG00000011561
13	66221207	66241963	EMC3	ENSSSCG00000011562
13	66241664	66310433	FANCD2	ENSSSCG00000011563
13	66258328	66258431	U6	ENSSSCG00000032118
13	66308667	66312846	FANCD2OS	ENSSSCG00000034155
13	66315550	66324827		ENSSSCG00000011565
13	66334588	66342640		ENSSSCG00000011567
13	66528452	66897163	ATP2B2	ENSSSCG00000023084
13	66998267	67118249	SLC6A11	ENSSSCG00000039850
13	67156796	67200042	SLC6A1	ENSSSCG00000011577
13	67209260	67411314	HRH1	ENSSSCG00000011576
13	67262752	67263609		ENSSSCG00000025515
13	67417938	67699655	ATG7	ENSSSCG00000011575
13	67613229	67614657		ENSSSCG00000040585
13	67698085	67873529	VGLL4	ENSSSCG00000030581
13	67896465	67896749		ENSSSCG00000037887
13	67921697	67983788	TAMM41	ENSSSCG00000011578
13	68170499	68220753	SYN2	ENSSSCG00000023225
13	68179806	68213261	TIMP4	ENSSSCG00000033000
13	68229013	68260269		ENSSSCG00000039791
13	68301566	68433963	PPARG	ENSSSCG00000011579
13	68467860	68520720	TSEN2	ENSSSCG00000011580
13	68758232	68788160	CAND2	ENSSSCG00000011582
13	68786856	68793244	RPL32	ENSSSCG00000035811
13	68792024	68792163	SNORA7	ENSSSCG00000030032
13	68794490	68813987	EFCAB12	ENSSSCG00000011587
13	68814823	68828964	MBD4	ENSSSCG00000033303
13	68828618	68905345	IFT122	ENSSSCG00000011589
13	68908578	68913651	RHO	ENSSSCG00000011590
13	68921491	68942744	H1FOO	ENSSSCG00000011591
13	68946661	68996606	PLXND1	ENSSSCG00000011592
13	69036428	69290104	TMCC1	ENSSSCG00000011593
13	69155560	69160347		ENSSSCG00000040441
13	69200396	69200492	U6	ENSSSCG00000020539
13	69261187	69268942		ENSSSCG00000039086
13	79425840	79610840	PIK3CB	ENSSSCG00000021203
13	79708693	79709825		ENSSSCG00000028562
13	99745467	99786519		ENSSSCG00000027790
13	99925083	99925801		ENSSSCG00000035535
13	99925521	99926273	C3orf80	ENSSSCG00000035935
13	99939722	100078148		ENSSSCG00000011733
13	100077867	100133166	SMC4	ENSSSCG00000011731
13	100083172	100083269	ssc-mir-15b	ENSSSCG00000019020
13	100083329	100083405	ssc-mir-16-1	ENSSSCG00000019389
13	108426066	108426495	Telomerase-vert	ENSSSCG00000023605
13	108427272	108432185	ACTRT3	ENSSSCG00000039994
13	108435189	108451888	MYNN	ENSSSCG00000026829
13	108459865	108487610	LRRC34	ENSSSCG00000024714
13	108498550	108519777	LRRIQ4	ENSSSCG00000023679
13	108517310	108550382	LRRC31	ENSSSCG00000032225
13	108748089	108790585	GPR160	ENSSSCG00000035883
13	108775289	108775411	SNORA40	ENSSSCG00000020952
13	108795364	108913621	PHC3	ENSSSCG00000030467
13	134363714	134403062	FYTTD1	ENSSSCG00000027139
13	134600010	134600114	U6	ENSSSCG00000020428
13	151722098	152005232	BBX	ENSSSCG00000011943
13	153479925	153700111	CBLB	ENSSSCG00000022486
13	153720002	153720823		ENSSSCG00000031765
13	154455136	154458928		ENSSSCG00000036856
13	154502043	154502187	U1	ENSSSCG00000040347
13	154546664	154547941		ENSSSCG00000035590
13	157422018	157460212	ZBTB11	ENSSSCG00000011953
13	157470048	157491211		ENSSSCG00000036491
13	157500348	157521693	TRMT10C	ENSSSCG00000011956
13	157504281	157672814	SENP7	ENSSSCG00000021791
13	157504281	157522344		ENSSSCG00000028677
13	157577523	157577647	5S_rRNA	ENSSSCG00000025501
13	157675265	157761358	IMPG2	ENSSSCG00000031273
13	159540281	159671459		ENSSSCG00000039367
13	173634661	173910739	GBE1	ENSSSCG00000012000
13	185352128	185352247	5S_rRNA	ENSSSCG00000035049
14	9258114	9434099	DOCK5	ENSSSCG00000009650
14	9442971	9447521	GNRH1	ENSSSCG00000009651
14	9455083	9518452	KCTD9	ENSSSCG00000009652
14	14967273	15104179	FDFT1	ENSSSCG00000026044
14	15097689	15097988	RNaseP_nuc	ENSSSCG00000021726
14	15110003	15110680		ENSSSCG00000032865
14	15116472	15120073		ENSSSCG00000036170
14	15143174	15145111	DEFB135	ENSSSCG00000039911
14	15170853	15176926		ENSSSCG00000032245
14	47269091	47301554		ENSSSCG00000009999
14	47304808	47335398	SF3A1	ENSSSCG00000010002
14	47341323	47349662	CCDC157	ENSSSCG00000010003
14	47351295	47357149	RNF215	ENSSSCG00000010005
14	47369658	47392873		ENSSSCG00000010006
14	47388883	47389095	ACEA_U3	ENSSSCG00000036615
14	47388884	47389095	U3	ENSSSCG00000032812
14	47392776	47395607	MTFP1	ENSSSCG00000010007
14	47405809	47421277	SEC14L3	ENSSSCG00000010008
14	47432234	47442975	SEC14L4	ENSSSCG00000038709
14	47453679	47476472	GAL3ST1	ENSSSCG00000010009
14	47478380	47495983	PES1	ENSSSCG00000010010
14	47496303	47517204	TCN2	ENSSSCG00000010011
14	47520089	47526704	SLC35E4	ENSSSCG00000010012
14	47539106	47550502		ENSSSCG00000033833
14	47540359	47554963	C5orf52	ENSSSCG00000010014
14	48038183	48051269	PIK3IP1	ENSSSCG00000010026
14	48075348	48094136	PATZ1	ENSSSCG00000010027
14	48126802	48153152	DRG1	ENSSSCG00000010029
14	48156841	48204338	EIF4ENIF1	ENSSSCG00000010030
14	48210542	48266038		ENSSSCG00000035290
14	48210570	48303508		ENSSSCG00000010031
14	48303455	48381597	PISD	ENSSSCG00000010032
14	48351979	48418167	PRR14L	ENSSSCG00000010033
14	48421875	48523593	DEPDC5	ENSSSCG00000010034
14	48447408	48447514	U6	ENSSSCG00000039075
14	48566343	48707223	SLC5A1	ENSSSCG00000010036
14	50083538	50165828	MAPK1	ENSSSCG00000010081
14	50190736	50208727	YPEL1	ENSSSCG00000037288
14	50201475	50232839	PPIL2	ENSSSCG00000010083
14	50234156	50244784		ENSSSCG00000010084
14	50245041	50245120	ssc-mir-130b	ENSSSCG00000018360
14	50245368	50245459		ENSSSCG00000019987
14	50249610	50251642	SDF2L1	ENSSSCG00000010085
14	50256517	50258933		ENSSSCG00000010086
14	50260799	50262550	YDJC	ENSSSCG00000010087
14	50264868	50315445		ENSSSCG00000037143
14	50325277	50329782		ENSSSCG00000010089
14	50365057	50368634	HIC2	ENSSSCG00000036472
14	50380759	50382936		ENSSSCG00000038652
14	50390410	50492013	PI4KA	ENSSSCG00000010092
14	50417201	50436468	SERPIND1	ENSSSCG00000010093
14	50492115	50509222	SNAP29	ENSSSCG00000010094
14	60794333	60861636		ENSSSCG00000031589
14	60884782	60905183		ENSSSCG00000028345
14	60938912	60968872	ZNF25	ENSSSCG00000010196
14	61331108	61359479	RET	ENSSSCG00000010199
14	61371454	61415843	CSGALNACT2	ENSSSCG00000010200
14	61422264	61566555	RASGEF1A	ENSSSCG00000010201
14	79353006	80106018	KCNMA1	ENSSSCG00000010325
14	82099487	82100569		ENSSSCG00000032975
14	82111316	82126341	MAT1A	ENSSSCG00000010337
14	82126803	82197770	DYDC1	ENSSSCG00000010338
14	82196856	82209280	DYDC2	ENSSSCG00000010339
14	82249269	82273169	FAM213A	ENSSSCG00000010340
14	84556677	84831020		ENSSSCG00000031127
14	95920700	96372532	PCDH15	ENSSSCG00000010426
14	116402778	116402935	U1	ENSSSCG00000033470
14	116482334	116482426	U8	ENSSSCG00000018956
14	116841197	116841303	U6	ENSSSCG00000020604
14	121210318	121266919	RBM20	ENSSSCG00000010626
14	121271513	121338546	PDCD4	ENSSSCG00000010627
14	121334300	121348549		ENSSSCG00000035869
14	121347933	121445558	SHOC2	ENSSSCG00000010628
15	7498158	7498235	ZEB2_AS1_4	ENSSSCG00000032773
15	7498746	7498852	ZEB2_AS1_3	ENSSSCG00000035500
15	7498897	7632655	ZEB2	ENSSSCG00000021343
15	7499602	7499662	ZEB2_AS1_2	ENSSSCG00000036031
15	7500702	7500829	ZEB2_AS1_1	ENSSSCG00000034691
15	17106724	17164740	ACMSD	ENSSSCG00000015699
15	17262138	17543398	TMEM163	ENSSSCG00000015700
15	19874452	19879760		ENSSSCG00000015708
15	19924305	19971733	SLC35F5	ENSSSCG00000015709
15	74927130	75261557	CERS6	ENSSSCG00000032715
15	107416220	107434421		ENSSSCG00000040137
15	124911922	124918536	KCNE4	ENSSSCG00000038149
15	124946377	124959572		ENSSSCG00000032296
16	41121007	41522669	IPO11	ENSSSCG00000016938
16	47738777	47777373		ENSSSCG00000016970
16	47792889	47796656		ENSSSCG00000016969
16	47795400	47795518	5S_rRNA	ENSSSCG00000018150
16	55625320	56086379	TENM2	ENSSSCG00000017018
16	57867823	57867928	U6	ENSSSCG00000020610
16	65497232	65555313	CLINT1	ENSSSCG00000017047
16	67738337	67738465	5S_rRNA	ENSSSCG00000020631
16	67861780	67861959		ENSSSCG00000033775
16	68393572	68484918	LARP1	ENSSSCG00000017069
16	68534134	68534227	U6	ENSSSCG00000033769
16	68677963	68683342	HAND1	ENSSSCG00000031080
16	68695896	68709742	SAP30L	ENSSSCG00000033176
16	68723995	68961287	GALNT10	ENSSSCG00000017072
16	69121537	69159408	FAM114A2	ENSSSCG00000017073
16	69332587	69687855	GRIA1	ENSSSCG00000022569
16	70471961	70472067	U6	ENSSSCG00000035184
16	70485599	70487296		ENSSSCG00000038311
16	70827922	70828384		ENSSSCG00000033604
16	70893235	70893705		ENSSSCG00000017077
16	71142397	71230158	GLRA1	ENSSSCG00000017078
16	71236096	71276084	G3BP1	ENSSSCG00000035676
16	71299321	71314597	ATOX1	ENSSSCG00000026414
16	71368164	71380972	SPARC	ENSSSCG00000017082
16	72720854	72721753	TAS2R1	ENSSSCG00000028554
16	72796449	73271224	SEMA5A	ENSSSCG00000017095
17	11410215	11475338	VDAC3	ENSSSCG00000007026
17	11436674	11486382	SLC20A2	ENSSSCG00000007027
17	11549516	11569655	SMIM19	ENSSSCG00000031857
18	6757476	6758405		ENSSSCG00000036539
18	6759297	6759521		ENSSSCG00000037073
18	6780808	6781731	TAS2R41	ENSSSCG00000016457
18	6807649	6808593	TAS2R60	ENSSSCG00000016458
18	6843135	6862568	EPHA1	ENSSSCG00000016459
18	6861287	6870582	ZYX	ENSSSCG00000016461
18	6893317	6903124	FAM131B	ENSSSCG00000028274
18	9940157	10134790	HIPK2	ENSSSCG00000026733
18	10160032	10176090	CLEC2L	ENSSSCG00000038147
18	11533183	11666127	CREB3L2	ENSSSCG00000016520
18	11600170	11600512		ENSSSCG00000033603
18	11705141	12176859	DGKI	ENSSSCG00000016521
18	12219744	12311922	PTN	ENSSSCG00000016522
18	12396472	12396765	Metazoa_SRP	ENSSSCG00000024209
18	20951003	21758168	GRM8	ENSSSCG00000022865
18	21158693	21158786		ENSSSCG00000038400
18	23590098	23596216	SPAM1	ENSSSCG00000016601
18	23603846	23603948	U6	ENSSSCG00000020314
18	23626982	23660397	HYAL4	ENSSSCG00000016602
18	23647134	23660354		ENSSSCG00000016603
18	24059332	24060184		ENSSSCG00000035710
18	24136575	24219235	SLC13A1	ENSSSCG00000016609
18	25654451	25937923	CPED1	ENSSSCG00000016618
18	29892028	29936366	TES	ENSSSCG00000040344
18	47298300	47491238	OSBPL3	ENSSSCG00000016715
18	47525838	47580503	GSDME	ENSSSCG00000016716
18	47593299	47711918	MPP6	ENSSSCG00000016717
18	49984804	50022799	IGFBP1	ENSSSCG00000016728
18	50000101	50035762	IGFBP3	ENSSSCG00000038783
18	50051364	50143549	ADCY1	ENSSSCG00000016726
18	50319797	50343287	RAMP3	ENSSSCG00000031144
18	50359886	50361775		ENSSSCG00000016731
18	50366902	50378086	TBRG4	ENSSSCG00000016732
18	50370931	50371067	SNORA21	ENSSSCG00000040616
18	50373717	50373851	SNORA5	ENSSSCG00000019629
18	50374218	50374351	SNORA5	ENSSSCG00000021904
18	50384976	50399855		ENSSSCG00000016733
18	50392909	50450585	CCM2	ENSSSCG00000016734
18	50609417	50685674	OGDH	ENSSSCG00000016743
18	50699566	50705525	TMED4	ENSSSCG00000016744
18	50705606	50715033	DDX56	ENSSSCG00000016745
18	50726717	50758524	NPC1L1	ENSSSCG00000016746
18	50759064	50830332	NUDCD3	ENSSSCG00000016747
18	50862294	50958782	CAMK2B	ENSSSCG00000039535
18	50960109	50971384	YKT6	ENSSSCG00000016750
18	50979777	51031335	GCK	ENSSSCG00000016751
18	51038260	51048413	POLD2	ENSSSCG00000016753
18	51045450	51056983	AEBP1	ENSSSCG00000016754

## Sheet: Table S6
Table S6. GO terms enriched (p < 0.05) based on candidate genes
Category	GO term	Term	Count	%	P-Value
GOTERM_BP	GO:0065008	regulation of biological quality	94	15.8	0.00012
GOTERM_BP	GO:0051649	establishment of localization	126	21.2	0.00049
GOTERM_BP	GO:0048856	anatomical structure development	146	24.6	0.0019
GOTERM_BP	GO:0050789	regulation of biological process	365	61.4	0.0023
GOTERM_BP	GO:0007275	multicellular organism development	112	18.9	0.005
GOTERM_BP	GO:0071840	cellular component organization or biogenesis	166	27.9	0.011
GOTERM_BP	GO:0016058	export from cell	20	3.4	0.012
GOTERM_BP	GO:0008219	cell death	32	5.4	0.013
GOTERM_BP	GO:0007610	behavior	23	3.9	0.014
GOTERM_BP	GO:0009653	anatomical structure morphogenesis	68	11.4	0.018
GOTERM_BP	GO:0048646	anatomical structure formation involved in morphogenesis	32	5.4	0.022
GOTERM_BP	GO:0008366	ensheathment of neurons	8	1.3	0.023
GOTERM_BP	GO:0016192	vesicle-mediated transport	43	7.2	0.025
GOTERM_BP	GO:0048468	cellular developmental process	97	16.3	0.033
GOTERM_BP	GO:0009719	response to endogenous stimulus	33	5.6	0.037
GOTERM_CC	GO:0030054	cell junction	85	14.3	7.4e-07
GOTERM_CC	GO:0045211	postsynapse	34	5.7	5.2e-06
GOTERM_CC	GO:0005622	intracellular anatomical structure	419	70.5	8.3e-06
GOTERM_CC	GO:0043226	organelle	384	64.6	1.1e-05
GOTERM_CC	GO:0005737	cytoplasm	331	55.7	1.3e-05
GOTERM_CC	GO:0042995	cell projection	76	12.8	0.00021
GOTERM_CC	GO:0045212	presynapse	26	4.4	0.00055
GOTERM_CC	GO:0005654	nucleoplasm	106	17.8	0.013
GOTERM_CC	GO:0005829	cytosol	114	19.2	0.023
GOTERM_CC	GO:0031974	membrane-enclosed lumen	125	21	0.038
GOTERM_MF	GO:0005515	protein binding	271	45.6	5.7e-06
GOTERM_MF	GO:0036094	small molecule binding	185	31.1	0.0037
GOTERM_MF	GO:0003682	chromatin binding	25	4.2	0.011
GOTERM_MF	GO:0008289	lipid binding	29	4.9	0.047
GOTERM_MF	GO:0008365	structural constituent of myelin sheath	3	0.5	0.049

## Sheet: Table S7
Table S7. KEGG pathway enriched (p < 0.05) based on candidate genes
Category	KEGG	Pathway	Count	%	P-Value
KEGG_PATHWAY	ssc04022	cGMP-PKG signaling pathway	13	2.2	0.0022
KEGG_PATHWAY	ssc04020	Calcium signaling pathway	16	2.7	0.005
KEGG_PATHWAY	ssc04024	cAMP signaling pathway	14	2.4	0.0097
KEGG_PATHWAY	ssc04218	Cellular senescence	11	1.9	0.01
KEGG_PATHWAY	ssc04742	Taste transduction	7	1.2	0.014
KEGG_PATHWAY	ssc05222	Alcoholic liver disease	10	1.7	0.016
KEGG_PATHWAY	ssc05216	Thyroid cancer	5	0.8	0.017
KEGG_PATHWAY	ssc04978	Mineral absorption	6	1	0.018
KEGG_PATHWAY	ssc04360	Axon guidance	11	1.9	0.03
KEGG_PATHWAY	ssc05161	Hepatitis B	10	1.7	0.042
KEGG_PATHWAY	ssc04925	Aldosterone synthesis and secretion	7	1.2	0.044
KEGG_PATHWAY	ssc05214	Glioma	6	1	0.046
