# Supplementary material for: Analysis of the genetic structure and selection signature of Xiangyang Black pigs using whole-genome resequencing data
Source: Research Square preprint supplement (doi:10.21203/rs.3.rs-7454947/v1), 2025-09-17

**Analysis of the genetic structure and selection signature of Xiangyang Black pigs using whole-genome resequencing data**

Zhong Xu1†, Zipeng Li1†, Mu Qiao1, Jiawei Zhou1, Yu Zhang1,Yue Feng1, Hua Sun1, Tong Chen1, Dake Chen1, Favour Oluwapelumi Oyelami2, Shuqi Mei1,3, Junjing Wu1*, Xianwen Peng1,3*

† These authors contributed equally to this work.

* Correspondence:

Junjing Wu

jeanne1106@126.com

Xianwen Peng

pxwpal@163.com

1 Hubei Key Laboratory of Animal Embryo and Molecular Breeding, Institute of Animal Husbandry and Veterinary, Hubei Provincial Academy of Agricultural Sciences, Wuhan 430064, China

2 The John Curtin School of Medical Research, Australian National University, Canberra 2600, Australia

3 Hubei Hongshan Laboratory, Wuhan 430064, China

Figure.S1 Genome-wide distribution of detected SNPs on 19 chromosomes for the Xiangyang Black pigs.


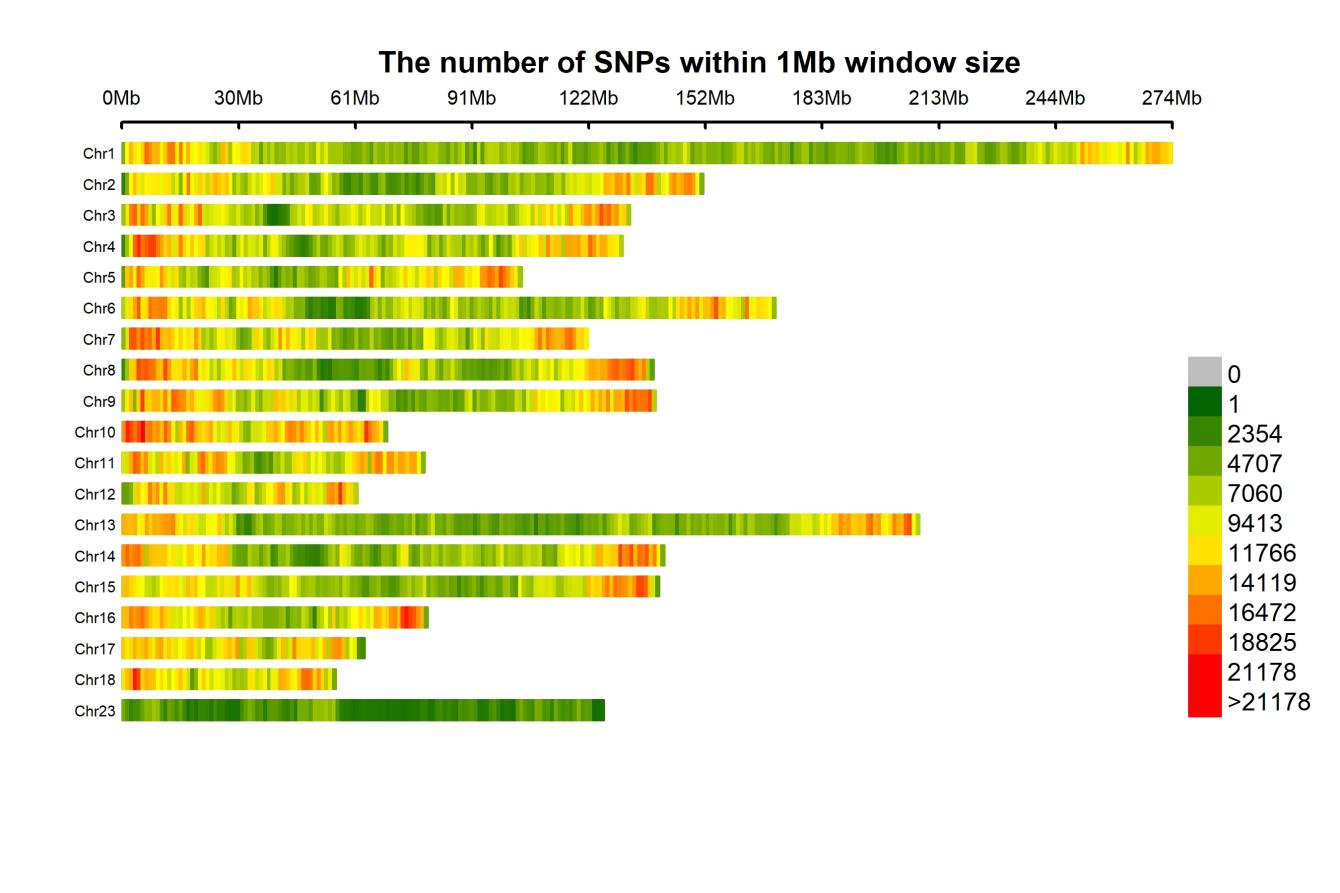


Figure.S2 ADMIXTURE analysis with presumed ancestral groups (K=2 to 5)
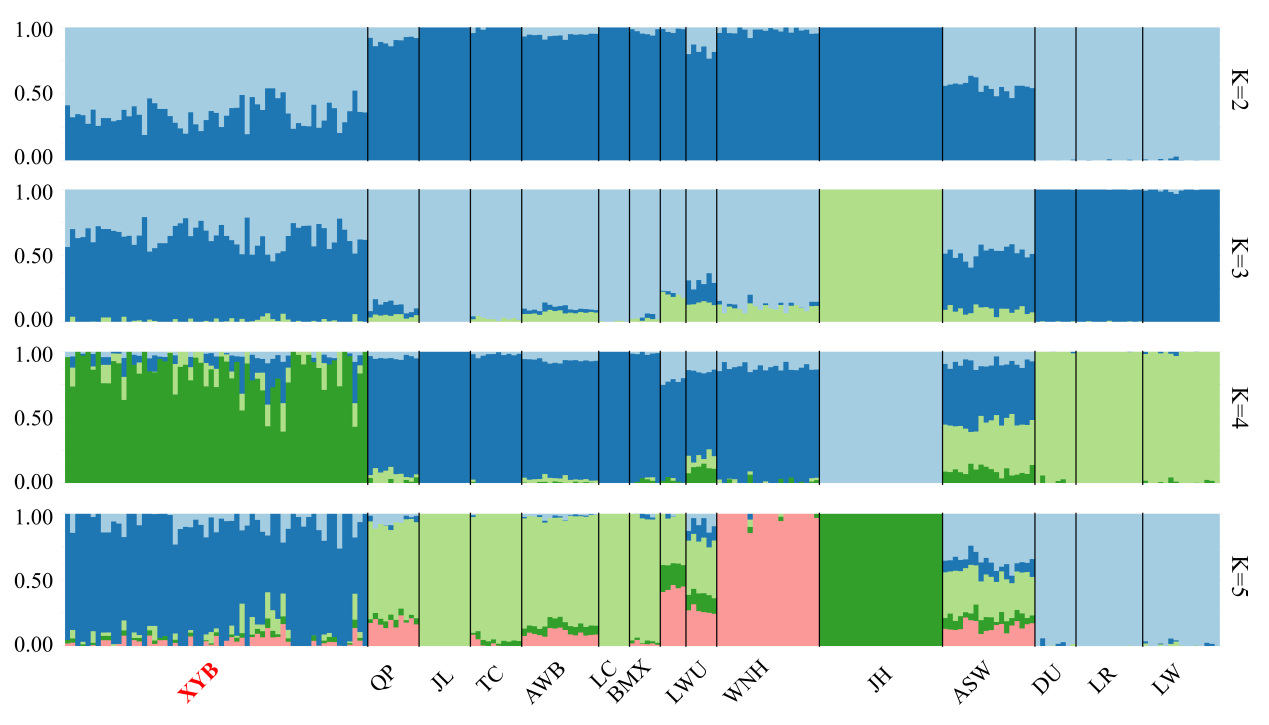

Supplement: Supplementary file 2 [file f34565322b8ba50bdb6796c6.docx]
